# Supplementary material
Source: PubMed Central journal article supplement (PMC3724194)
Supplement: supp_blood-2013-02-485094_blood-2013-02-485094-1.pdf [file supp_blood-2013-02-485094_blood-2013-02-485094-1.pdf]

## **Supplemental Methods**

### *Atherosclerosis Risk in Communities (ARIC)*

The ARIC study is a prospective population-based study evaluating atherosclerosis and cardiovascular diseases in 15,792 men and women, including 11,478 non-Hispanic whites and 4,314 African Americans, in 4 U.S. communities (suburban Minneapolis, Minnesota; Washington County, Maryland; Forsyth County, North Carolina, and Jackson, Mississippi) [1]. Participants were age 45- 64 years at their baseline examination in 1987-1989 when blood was drawn for DNA extraction and coagulation testing [2]. VWF antigen was determined by a commercial ELISA kit (American Bioproducts) and reported as a percentage of the Universal Coagulation Reference Plasma (Thromboscreen, Pacific Hemostasis; Curtin Matheson Scientific Inc) or IU/dL. FVIII activity was measured by the ability of a testing sample to correct the clotting time of human FVIII-deficient plasma and reported as IU/dL (George King Biomedical Inc). The reliability coefficient ( $1 - \text{intra-individual variance}/\text{total variance}$ ) obtained from repeat testing of individuals over several weeks was 0.68 for VWF and 0.86 for FVIII. Baseline measures of VWF and FVIII were available on 2,354 AA individuals from the ARIC cohort. Of these, 324 were sequenced as part of ESP and 2,030 were imputed using CARE GWAS data.

### *Coronary Artery Risk Development in Young Adults (CARDIA)*

The CARDIA study is a prospective, multi-center investigation of the natural history and etiology of cardiovascular disease in African Americans and whites 18-30 years of age at the time of initial examination [3,4]. Participants were recruited at random during 1985-86 primarily from geographically based populations in Birmingham AL, Chicago IL, and Minneapolis MN and, in Oakland, CA, from the membership of the Kaiser-Permanente Health Plan. The initial examination included 5,115 participants selectively recruited to represent proportionate racial, gender, age, and education groups from each of the four communities. Seven follow-up examinations have been conducted at years 2, 5, 7, 10, 15, 20, and 25. The blood collection and processing was virtually identical to that of the ARIC study. DNA extraction for genetic studies was performed at the year 10 examination. VWF and FVIII testing were performed in 698

AA at year 5, and ristocetin cofactor activity was measured in 324 AA at Year 7 [21]. FVIII coagulant activity was assayed by a one-stage system with reagents from Pacific Hemostasis and George King Biomedical, Inc. VWF antigen was measured by ELISA (American Bioproducts Co). VWF activity was measured using the ristocetin cofactor assay. VWF antigen or FVIII coagulant activity were available on 353 AA individuals from CARDIA for the current analysis. Of these, 40 were sequenced as part of ESP and 313 were imputed using CARE GWAS data.

#### *Multi-Ethnic Study of Atherosclerosis (MESA)*

The MESA is evaluating preclinical atherosclerosis and its progression in 4 racial/ethnic groups. Details of the design have been published [5]. Briefly, 6814 men and women age 45-84 years whose self-reported race/ethnicity was white, black, Chinese, or Hispanic were recruited from six US communities: Baltimore City and Baltimore County, MD; Chicago, IL; Forsyth County, NC; Los Angeles County, CA; Northern Manhattan and the Bronx, NY; and St. Paul, MN. All participants were free of clinical diagnoses of CVD. Laboratory assays were performed at the University of Vermont (Burlington, VT) [6]. Factor VIII coagulant activity was measured at baseline in all MESA participants using the Sta-R analyzer (STA-Deficient VIII; Diagnostica Stago, Parsippany, NJ, USA) (CV=10%). VWF antigen was measured at baseline in a random sample of 1000 individuals chosen from the first 5030 enrolled participants using immunoturbidometric methods on the Sta-R analyzer (Liatest VWF; Diagnostica Stago, Parsippany, NJ, USA). Data on FVIII were available for 1,607 AA individuals and on VWF for 193 individuals. Of these, 151 were sequenced as part of ESP and 1456 were imputed using CARE GWAS data.

#### *Women's Health Initiative (WHI)*

The WHI clinical trial of conjugated equine estrogen with or without medroxyprogesterone acetate, compared to placebo included 27,347 postmenopausal women aged 50 to 79 years at 40 US centers [7]. Factor VIII activity and VWF antigen were measured at the baseline WHI exam in the same lab with the same methods as in MESA. We included 153 AA women (132 with VWF antigen and 154 with factor VIII activity) from the clinical trial of hormone therapy who had consented to genetic research and who

were sampled as part of a case-control study of laboratory risk factors for MI, stroke and venous thrombosis [8,9]. Of these, 80 were sequenced as part of ESP and 74 were imputed using SHARe GWAS data.

### **Meta-analysis of cohort-specific results and tests of homogeneity**

All analyses were performed separately within each cohort (for those with imputed genotype data) and separately for those with sequence data. Study-level regression results were then combined using inverse-variance weighted fixed-effects meta-analysis to derive an overall  $P$ -value and effect estimate ( $\beta$  coefficients and standard error) for each single nucleotide variant [10]. We tested for consistency of results between studies by using Cochran's  $Q$  statistic and the  $I^2$  inconsistency metric [11]. The  $I^2$  metric ranges from 0-100%, and measures the degree of inconsistency across studies in a meta-analysis as the percentage of total variation across studies that is due to heterogeneity rather than chance. Low, moderate, and high degrees of heterogeneity between studies is defined as  $I^2$  values of 25%, 50%, and 75%, respectively.

### ***In silico* prediction of VWF missense variants as functionally deleterious vs. neutral**

We characterized the potential impact of each VWF missense variant on VWF structure/function using the algorithm Condel (CONsensus DELeteriousness score of non-synonymous single nucleotide variants) [10]. Condel integrates the output of three widely used *in silico* approaches that assess the impact of non-synonymous SNVs on protein function: SIFT [11], Polyphen2 [12] and MutationAssessor [13]. A combination of multiple algorithms can improve prediction accuracy of classifying mutations as deleterious or neutral [10]. SIFT and MutationAssessor are based on evolutionary conservation of amino acids in a particular protein family, while Polyphen2 compares various protein structural- and sequence-based features between a wild-type and mutant. In the consensus prediction made by Condel, the probability that a predicted deleterious mutation is not a false positive and the probability that a predicted neutral mutation is not a false negative are employed as weights. As an additional method to predict the functional consequences of a VWF missense variant, we used a DNA sequence conservation-based

method called Genomic Evolutionary Rate Profiling (GERP) [14], which identifies functionally constrained DNA sequence elements using multiple sequence alignments to quantify nucleotide substitution deficits ("rejected substitutions") that reflect the strength of past purifying selection.

### References:

1. The Atherosclerosis Risk in Communities (ARIC) Study: design and objectives. The ARIC investigators. *Am J Epidemiol*. 1987;129(4): 687-702.
2. Conlan MG, Folsom AR, Finch A, et al. Associations of factor VIII and von Willebrand factor with age, race, sex, and risk factors for atherosclerosis. The Atherosclerosis Risk in Communities (ARIC) Study. *Thromb Haemost*. 1993;70(3):380-5.
3. Friedman GD, Cutter GR, Donahue RP, et al. CARDIA: study design, recruitment, and some characteristics of the examined subjects. *J Clin Epidemiol*. 1988; 41(11):1105-1116.
4. Green D, Foiles N, Chan C, Schreiner PJ, Liu K. Elevated fibrinogen levels and subsequent subclinical atherosclerosis: the CARDIA Study. *Atherosclerosis*. 2009;202(2):623-31.
5. Bild DE, Bluemke DA, Burke GL, et al. Multi-ethnic study of atherosclerosis: objectives and design. *Am J Epidemiol* 2002, 156(9):871-81.
6. Lutsey PL, Cushman M, Steffen LM, et al. Plasma hemostatic factors and endothelial markers in four racial/ethnic groups: the MESA study. *J Thromb Haemost*. 2006 Dec;4(12):2629-35.
7. Design of the Women's Health Initiative clinical trial and observational study. The Women's Health Initiative Study Group. *Control Clin Trials*. 1998 19(1):61-109.
8. Rossouw JE, Cushman M, Greenland P, et al. Inflammatory, lipid, thrombotic, and genetic markers of coronary heart disease risk in the women's health initiative trials of hormone therapy. *Arch Intern Med*. 2008;168(20):2245-53.
9. Kooperberg C, Cushman M, Hsia J, et al. Can biomarkers identify women at increased stroke risk? The Women's Health Initiative Hormone Trials. *PLoS Clin Trials*. 2007;2(6):e28.
10. Willer CJ, Li Y, Abecasis GR. METAL: fast and efficient meta-analysis of genomewide association scans. *Bioinformatics*. 2010;26(17):2190-2191.
11. Higgins JP, Thompson SG, Deeks JJ, Altman DG. Measuring inconsistency in meta-analyses. *BMJ*. 2003;327(7414):557-60.
12. González-Pérez A, López-Bigas N. Improving the assessment of the outcome of nonsynonymous SNVs with a consensus deleteriousness score, Condel. *Am J Hum Genet*. 2011;88(4):440-9.
13. Kumar P, Henikoff S, Ng PC. Predicting the effects of coding non-synonymous variants on protein function using the SIFT algorithm. *Nat Protoc*. 2009;4(7):1073-81.
14. Adzhubei IA, Schmidt S, Peshkin L, et al. A method and server for predicting damaging missense mutations. *Nat Methods*. 2010;7(4):248-249.
15. Reva B, Antipin Y, Sander C. Predicting the functional impact of protein mutations: application to cancer genomics. *Nucleic Acids Res*. 2011;39(17):e118.
16. Cooper GM, Stone EA, Asimenos G; NISC Comparative Sequencing Program, Green ED, Batzoglou S, Sidow A. Distribution and intensity of constraint in mammalian genomic sequence. *Genome Res*. 2005;15(7):901-13.

## Supplemental Acknowledgement:

### HeartGO:

**Atherosclerosis Risk in Communities (ARIC):** NHLBI (N01 HC-55015, N01 HC-55016, N01HC-55017, N01 HC-55018, N01 HC-55019, N01 HC-55020, N01 HC-55021); **Cardiovascular Health Study (CHS):** NHLBI (HHSN268201200036C, N01-HC-85239, N01-HC-85079 through N01-HC-85086, N01-HC-35129, N01 HC-15103, N01 HC-55222, N01-HC-75150, N01-HC-45133, and grant HL080295), with additional support from NINDS and from NIA (AG-023629, AG-15928, AG-20098, and AG-027058); **Coronary Artery Risk Development in Young Adults (CARDIA):** NHLBI (N01-HC95095 & N01-HC48047, N01-HC48048, N01-HC48049, and N01-HC48050); **Framingham Heart Study (FHS):** NHLBI (N01-HC-25195 and grant R01 NS17950) with additional support from NIA (AG08122 and AG033193); **Jackson Heart Study (JHS):** NHLBI and the National Institute on Minority Health and Health Disparities (N01 HC-95170, N01 HC-95171 and N01 HC-95172); **Multi-Ethnic Study of Atherosclerosis (MESA):** NHLBI (N01-HC-95159 through N01-HC-95169 and RR-024156).

### Lung GO:

**Cystic Fibrosis (CF):** Cystic Fibrosis Foundation (GIBSON07K0, KNOWLE00A0, OBSERV04K0, RDP R026), the NHLBI (R01 HL-068890, R02 HL-095396), NIH National Center for Research Resources (UL1 RR-025014), and the National Human Genome Research Institute (NHGRI) (5R00 HG-004316). **Chronic Obstructive Pulmonary Disease (COPDGene):** NHLBI (U01 HL-089897, U01 HL-089856), and the COPD Foundation through contributions made to an Industry Advisory Board comprised of AstraZeneca, Boehringer Ingelheim, Novartis, Pfizer, and Sunovion. The COPDGene clinical centers and investigators are available at [www.copdgene.org](http://www.copdgene.org). **Acute Lung Injury (ALI):** NHLBI (RC2 HL-101779). **Lung Health Study (LHS):** NHLBI (RC2 HL-066583), the NHGRI (HG-004738), and the NHLBI Division of Lung Diseases (HR-46002). **Pulmonary Arterial Hypertension (PAH):** NIH (P50 HL-084946, K23 AR-52742), and the NHLBI (F32 HL-083714). **Asthma:** NHLBI (RC2 HL-101651), and the NIH (HL-077916, HL-69197, HL-76285, M01 RR-07122).

### SWISS and ISGS:

Siblings with Ischemic Stroke Study (SWISS): National Institute of Neurological Disorders and Stroke (NINDS) (R01 NS039987); Ischemic Stroke Genetics Study (ISGS): NINDS (R01 NS042733)

### WHISP:

**Women's Health Initiative (WHI):** The WHI Sequencing Project is funded by the NHLBI (HL-102924) as well as the National Institutes of Health (NIH), U.S. Department of Health and Human Services through contracts N01WH22110, 24152, 32100-2, 32105-6, 32108-9, 32111-13, 32115, 32118-32119, 32122, 42107-26, 42129-32, and 44221, and HHSN268201100046C. The authors thank the WHI investigators and staff for their dedication, and the study participants for making the program possible. A full listing of WHI investigators can be found at: <https://cleo.whi.org/researchers/Documents%20%20Write%20a%20Paper/WHI%20Investigator%20Short%20List.pdf>

## NHLBI GO Exome Sequencing Project BroadGO

Stacey B. Gabriel (Broad Institute)<sup>4, 5, 11, 16, 17</sup>, David M. Altshuler (Broad Institute, Harvard Medical School, Massachusetts General Hospital)<sup>1, 5, 7, 17</sup>, Gonçalo R. Abecasis (University of Michigan)<sup>3, 5, 9, 13, 15, 17</sup>, Hooman Allayee (University of Southern California)<sup>5</sup>, Sharon Cresci (Washington University School of Medicine)<sup>5</sup>, Mark J. Daly (Broad Institute, Massachusetts General Hospital), Paul I. W. de Bakker (Broad Institute, Harvard Medical School, University Medical Center Utrecht)<sup>3, 15</sup>, Mark A. DePristo (Broad Institute)<sup>4, 13, 15, 16</sup>, Ron Do (Broad Institute)<sup>5, 9, 13, 15</sup>, Peter Donnelly (University of Oxford)<sup>5</sup>, Deborah N. Farlow (Broad Institute)<sup>3, 4, 5, 12, 14, 16, 17</sup>, Tim Fennell (Broad Institute), Kiran Garimella (University of Oxford)<sup>4, 16</sup>, Stanley L. Hazen (Cleveland Clinic)<sup>5</sup>, Youna Hu (University of Michigan)<sup>3, 9, 15</sup>, Daniel M. Jordan (Harvard Medical School, Harvard University)<sup>13</sup>, Goo Jun (University of Michigan)<sup>13</sup>, Sekar Kathiresan (Broad Institute, Harvard Medical School, Massachusetts General Hospital)<sup>5, 8, 9, 12, 14, 15, 17, 20</sup>, Hyun Min Kang (University of Michigan)<sup>9, 13, 16</sup>, Adam Kiezun (Broad Institute)<sup>5, 13, 15</sup>, Guillaume Lettre (Broad Institute, Montreal Heart Institute, Université de Montréal)<sup>1, 2, 13, 15</sup>, Bingshan Li (University of Michigan)<sup>3</sup>, Mingyao Li (University of Pennsylvania)<sup>5</sup>, Christopher H. Newton-Cheh (Broad Institute, Massachusetts General Hospital, Harvard Medical School)<sup>3, 8, 15</sup>, Sandosh Padmanabhan (University of Glasgow School of Medicine)<sup>3, 12, 15</sup>, Gina Peloso (Broad Institute, Harvard Medical School, Massachusetts General Hospital)<sup>5</sup>, Sara Pulit (Broad Institute)<sup>3, 15</sup>, Daniel J. Rader (University of Pennsylvania)<sup>5</sup>, David Reich (Broad Institute, Harvard Medical School)<sup>15</sup>, Muredach P. Reilly (University of Pennsylvania)<sup>5</sup>, Manuel A. Rivas (Broad Institute, Massachusetts General Hospital)<sup>5</sup>, Steve Schwartz (Fred Hutchinson Cancer Research Center)<sup>5, 12</sup>, Laura Scott (University of Michigan)<sup>1</sup>, David S. Siscovick (University of Washington)<sup>5, 1, 25</sup>, John A. Spertus (University of Missouri Kansas City)<sup>5</sup>, Nathan O. Stitzel (Brigham and Women's Hospital)<sup>5, 15</sup>, Nina Stoletzki (Brigham and Women's Hospital, Broad Institute, Harvard Medical School)<sup>13</sup>, Shamil R. Sunyaev (Brigham and Women's Hospital, Broad Institute, Harvard Medical School)<sup>1, 3, 5, 13, 15</sup>, Benjamin F. Voight (Broad Institute, Massachusetts General Hospital), Cristen J. Willer (University of Michigan)<sup>1, 9, 13, 15</sup>

## HeartGO

Stephen S. Rich (University of Virginia)<sup>2, 4, 7, 8, 9, 11, 14, 15, 17, 18, 31</sup>, Ermeg Akyzbekova (Jackson State University, University of Mississippi Medical Center)<sup>29</sup>, Larry D. Atwood\* (Boston University)<sup>1, 11, 28</sup>, Christie M. Ballantyne (Baylor College of Medicine, Methodist DeBakey Heart Center)<sup>9, 22</sup>, Maja Barbalic (University of Texas Health Science Center Houston)<sup>9, 14, 15, 17, 22</sup>, R. Graham Barr (Columbia University Medical Center)<sup>10, 31</sup>, Emelia J. Benjamin (Boston University)<sup>14, 20, 28</sup>, Joshua Bis (University of Washington)<sup>15, 23</sup>, Eric Boerwinkle (University of Texas Health Science Center Houston)<sup>3, 5, 9, 13, 15, 17, 22</sup>, Donald W. Bowden (Wake Forest University)<sup>1, 31</sup>, Jennifer Brody (University of Washington)<sup>3, 5, 15, 23</sup>, Matthew Budoff (Harbor-UCLA Medical Center)<sup>31</sup>, Greg Burke (Wake Forest University)<sup>5, 31</sup>, Sarah Buxbaum (Jackson State University)<sup>3, 13, 15, 29</sup>, Jeff Carr (Wake Forest University)<sup>25, 29, 31</sup>, Donna T. Chen (University of Virginia)<sup>6, 11</sup>, Ida Y. Chen (Cedars-Sinai Medical Center)<sup>1, 31</sup>, Wei-Min Chen (University of Virginia)<sup>13, 15, 18</sup>, Pat Concannon (University of Virginia)<sup>11</sup>, Jacy Crosby (University of Texas Health Science Center Houston)<sup>22</sup>, L. Adrienne Cupples (Boston University)<sup>1, 3, 5, 9, 13, 15, 18, 28</sup>, Ralph D'Agostino (Boston University)<sup>28</sup>, Anita L. DeStefano (Boston University)<sup>13, 18, 28</sup>, Albert Dreisbach (University of Mississippi Medical Center)<sup>3, 29</sup>, Josée Dupuis (Boston University)<sup>1, 28</sup>, J. Peter Durda (University of Vermont)<sup>15, 23</sup>, Jaclyn Ellis (University of North Carolina Chapel Hill)<sup>1</sup>, Aaron R. Folsom (University of Minnesota)<sup>5, 22</sup>, Myriam Fornage (University of Texas Health Science Center Houston)<sup>3, 18, 25</sup>, Caroline S. Fox (National Heart, Lung, and Blood Institute)<sup>1, 28</sup>, Ervin Fox (University of Mississippi Medical Center)<sup>3, 9, 29</sup>, Vincent Funari (Cedars-Sinai Medical Center)<sup>1, 11, 31</sup>, Santhi K. Ganesh (University of Michigan)<sup>2, 22</sup>, Julius Gardin (Hackensack University Medical Center)<sup>25</sup>, David Goff (Wake Forest University)<sup>25</sup>, Ora Gordon (Cedars-Sinai Medical Center)<sup>11, 31</sup>, Wayne Grody (University of California Los Angeles)<sup>11, 31</sup>, Myron Gross (University of Minnesota)<sup>1, 5, 14, 25</sup>, Xiuqing Guo (Cedars-Sinai Medical Center)<sup>3, 15, 31</sup>, Ira M. Hall (University

of Virginia), Nancy L. Heard-Costa (Boston University)<sup>1, 11, 28</sup>, Susan R. Heckbert (University of Washington)<sup>10, 14, 20, 23</sup>, Nicholas Heintz (University of Vermont), David M. Herrington (Wake Forest University)<sup>5, 31</sup>, DeMarc Hickson (Jackson State University, University of Mississippi Medical Center)<sup>29</sup>, Jie Huang (National Heart, Lung, and Blood Institute)<sup>5, 28</sup>, Shih-Jen Hwang (Boston University, National Heart, Lung, and Blood Institute)<sup>3, 28</sup>, David R. Jacobs (University of Minnesota)<sup>25</sup>, Nancy S. Jenny (University of Vermont)<sup>1, 2, 23</sup>, Andrew D. Johnson (National Heart, Lung, and Blood Institute)<sup>2, 5, 11, 28</sup>, Craig W. Johnson (University of Washington)<sup>15, 31</sup>, Steven Kawut (University of Pennsylvania)<sup>10, 31</sup>, Richard Kronmal (University of Washington)<sup>31</sup>, Raluca Kurz (Cedars-Sinai Medical Center)<sup>11, 31</sup>, Ethan M. Lange (University of North Carolina Chapel Hill)<sup>3, 5, 9, 13, 34</sup>, Leslie A. Lange (University of North Carolina Chapel Hill)<sup>1, 2, 3, 5, 9, 12, 13, 15, 17, 18, 20, 25, 34</sup>, Martin G. Larson (Boston University)<sup>3, 15, 28</sup>, Mark Lawson (University of Virginia), Cora E. Lewis (University of Alabama at Birmingham)<sup>25, 34</sup>, Daniel Levy (National Heart, Lung, and Blood Institute)<sup>3, 15, 17, 28</sup>, Dalin Li (Cedars-Sinai Medical Center)<sup>11, 15, 31</sup>, Honghuang Lin (Boston University)<sup>20, 28</sup>, Chunyu Liu (National Heart, Lung, and Blood Institute)<sup>3, 28</sup>, Jiankang Liu (University of Mississippi Medical Center)<sup>1, 29</sup>, Kiang Liu (Northwestern University)<sup>25</sup>, Xiaoming Liu (University of Texas Health Science Center Houston)<sup>15, 22</sup>, Yongmei Liu (Wake Forest University)<sup>2, 5, 31</sup>, William T. Longstreth (University of Washington)<sup>18, 23</sup>, Cay Loria (National Heart, Lung, and Blood Institute)<sup>25</sup>, Thomas Lumley (University of Auckland)<sup>9, 23</sup>, Kathryn Lunetta (Boston University)<sup>28</sup>, Aaron J. Mackey (University of Virginia)<sup>16, 18</sup>, Rachel Mackey (University of Pittsburgh)<sup>1, 23, 31</sup>, Ani Manichaikul (University of Virginia)<sup>8, 15, 18, 31</sup>, Taylor Maxwell (University of Texas Health Science Center Houston)<sup>22</sup>, Barbara McKnight (University of Washington)<sup>15, 23</sup>, James B. Meigs (Brigham and Women's Hospital, Harvard Medical School, Massachusetts General Hospital)<sup>1, 28</sup>, Alanna C. Morrison (University of Texas Health Science Center Houston)<sup>3, 15, 17</sup>, Solomon K. Musani (University of Mississippi Medical Center)<sup>3, 29</sup>, Josyf C. Mychaleckyj (University of Virginia)<sup>13, 15, 31</sup>, Jennifer A. Nettleton (University of Texas Health Science Center Houston)<sup>9, 22</sup>, Kari North (University of North Carolina Chapel Hill)<sup>1, 3, 9, 10, 13, 15, 17, 34</sup>, Christopher J. O'Donnell (Massachusetts General Hospital, National Heart, Lung, and Blood Institute)<sup>2, 5, 9, 11, 12, 14, 15, 17, 20, 28</sup>, Daniel O'Leary (Tufts University School of Medicine)<sup>25, 31</sup>, Frank S. Ong (Cedars-Sinai Medical Center)<sup>3, 11, 31</sup>, Walter Palmas (Columbia University)<sup>3, 15, 31</sup>, James S. Pankow (University of Minnesota)<sup>1, 22</sup>, Nathan D. Pankratz (Indiana University School of Medicine)<sup>15, 25</sup>, Shom Paul (University of Virginia), Marco Perez (Stanford University School of Medicine), Sharina D. Person (University of Alabama at Birmingham, University of Alabama at Tuscaloosa)<sup>25</sup>, Joseph Polak (Tufts University School of Medicine)<sup>31</sup>, Wendy S. Post (Johns Hopkins University)<sup>3, 9, 11, 14, 20, 31</sup>, Bruce M. Psaty (Group Health Research Institute, University of Washington)<sup>3, 5, 9, 11, 14, 15, 23</sup>, Aaron R. Quinlan (University of Virginia)<sup>18, 19</sup>, Leslie J. Raffel (Cedars-Sinai Medical Center)<sup>6, 11, 31</sup>, Vasani S. Ramachandran (Boston University)<sup>3, 28</sup>, Alexander P. Reiner (Fred Hutchinson Cancer Research Center, University of Washington)<sup>1, 2, 3, 5, 9, 11, 12, 13, 14, 15, 20, 25, 34</sup>, Kenneth Rice (University of Washington)<sup>15, 23</sup>, Jerome I. Rotter (Cedars-Sinai Medical Center)<sup>1, 3, 6, 8, 11, 15, 31</sup>, Jill P. Sanders (University of Vermont)<sup>23</sup>, Pamela Schreiner (University of Minnesota)<sup>25</sup>, Sudha Seshadri (Boston University)<sup>18, 28</sup>, Steve Shea (Brigham and Women's Hospital, Harvard University)<sup>28</sup>, Stephen Sidney (Kaiser Permanente Division of Research, Oakland, CA)<sup>25</sup>, Kevin Silverstein (University of Minnesota)<sup>25</sup>, David S. Siscovick (University of Washington)<sup>5, 1, 25</sup>, Nicholas L. Smith (University of Washington)<sup>2, 15, 20, 23</sup>, Nona Sotoodehnia (University of Washington)<sup>3, 15, 23</sup>, Asoke Srinivasan (Tougaloo College)<sup>29</sup>, Herman A. Taylor (Jackson State University, Tougaloo College, University of Mississippi Medical Center)<sup>5, 29</sup>, Kent Taylor (Cedars-Sinai Medical Center)<sup>31</sup>, Fridtjof Thomas (University of Texas Health Science Center Houston)<sup>3, 22</sup>, Russell P. Tracy (University of Vermont)<sup>5, 9, 11, 12, 14, 15, 17, 20, 23</sup>, Michael Y. Tsai (University of Minnesota)<sup>9, 31</sup>, Kelly A. Volcik (University of Texas Health Science Center Houston)<sup>22</sup>, Christina L Wassel (University of California San Diego)<sup>9, 15, 31</sup>, Karol Watson (University of California Los Angeles)<sup>31</sup>, Gina Wei (National Heart, Lung, and Blood Institute)<sup>25</sup>, Wendy White (Tougaloo College)<sup>29</sup>, Kerri L. Wiggins (University of Vermont)<sup>23</sup>,

Jemma B. Wilk (Boston University)<sup>10, 28</sup>, O. Dale Williams (Florida International University)<sup>25</sup>, Gregory Wilson (Jackson State University)<sup>29</sup>, James G. Wilson (University of Mississippi Medical Center)<sup>1, 2, 5, 8, 9, 11, 12, 14, 17, 20, 29</sup>, Phillip Wolf (Boston University)<sup>28</sup>, Neil A. Zakai (University of Vermont)<sup>2, 23</sup>

### **ISGS and SWISS**

John Hardy (Reta Lila Weston Research Laboratories, Institute of Neurology, University College London)<sup>18</sup>, James F. Meschia (Mayo Clinic)<sup>18</sup>, Michael Nalls (National Institute on Aging)<sup>2, 18</sup>, Stephen S. Rich (University of Virginia)<sup>2, 4, 7, 8, 9, 11, 14, 15, 17, 18, 31</sup>, Andrew Singleton (National Institute on Aging)<sup>18</sup>, Brad Worrall (University of Virginia)<sup>18</sup>

### **LungGO**

Michael J. Bamshad (Seattle Children's Hospital, University of Washington)<sup>4, 6, 7, 8, 10, 11, 13, 15, 17, 27</sup>, Kathleen C. Barnes (Johns Hopkins University)<sup>2, 10, 12, 14, 15, 17, 20, 24, 30, 32</sup>, Ibrahim Abdulhamid (Children's Hospital of Michigan)<sup>27</sup>, Frank Accurso (University of Colorado)<sup>27</sup>, Ran Anbar (Upstate Medical University)<sup>27</sup>, Terri Beaty (Johns Hopkins University)<sup>24, 30</sup>, Abigail Bigham (University of Washington)<sup>13, 15, 27</sup>, Phillip Black (Children's Mercy Hospital)<sup>27</sup>, Eugene Bleecker (Wake Forest University)<sup>33</sup>, Kati Buckingham (University of Washington)<sup>27</sup>, Anne Marie Cairns (Maine Medical Center)<sup>27</sup>, Wei-Min Chen (University of Virginia)<sup>13, 15, 18</sup>, Daniel Caplan (Emory University)<sup>27</sup>, Barbara Chatfield (University of Utah)<sup>27</sup>, Aaron Chidekel (A.I. Dupont Institute Medical Center)<sup>27</sup>, Michael Cho (Brigham and Women's Hospital, Harvard Medical School)<sup>13, 15, 24</sup>, David C. Christiani (Massachusetts General Hospital)<sup>21</sup>, James D. Crapo (National Jewish Health)<sup>24, 30</sup>, Julia Crouch (Seattle Children's Hospital)<sup>6</sup>, Denise Daley (University of British Columbia)<sup>30</sup>, Anthony Dang (University of North Carolina Chapel Hill)<sup>26</sup>, Hong Dang (University of North Carolina Chapel Hill)<sup>26</sup>, Alicia De Paula (Ochsner Health System)<sup>27</sup>, Joan DeCelie-Germana (Schneider Children's Hospital)<sup>27</sup>, Allen Dozor (New York Medical College, Westchester Medical Center)<sup>27</sup>, Mitch Drumm (University of North Carolina Chapel Hill)<sup>26</sup>, Maynard Dyson (Cook Children's Med. Center)<sup>27</sup>, Julia Emerson (Seattle Children's Hospital, University of Washington)<sup>27</sup>, Mary J. Emond (University of Washington)<sup>10, 13, 15, 17, 27</sup>, Thomas Ferkol (St. Louis Children's Hospital, Washington University School of Medicine)<sup>27</sup>, Robert Fink (Children's Medical Center of Dayton)<sup>27</sup>, Cassandra Foster (Johns Hopkins University)<sup>30</sup>, Deborah Froh (University of Virginia)<sup>27</sup>, Li Gao (Johns Hopkins University)<sup>24, 30, 32</sup>, William Gershan (Children's Hospital of Wisconsin)<sup>27</sup>, Ronald L. Gibson (Seattle Children's Hospital, University of Washington)<sup>10, 27</sup>, Elizabeth Godwin (University of North Carolina Chapel Hill)<sup>26</sup>, Magdalen Gondor (All Children's Hospital Cystic Fibrosis Center)<sup>27</sup>, Hector Gutierrez (University of Alabama at Birmingham)<sup>27</sup>, Nadia N. Hansel (Johns Hopkins University, Johns Hopkins University School of Public Health)<sup>10, 15, 30</sup>, Paul M. Hassoun (Johns Hopkins University)<sup>10, 14, 32</sup>, Peter Hiatt (Texas Children's Hospital)<sup>27</sup>, John E. Hokanson (University of Colorado)<sup>24</sup>, Michelle Howenstine (Indiana University, Riley Hospital for Children)<sup>27</sup>, Laura K. Hummer (Johns Hopkins University)<sup>32</sup>, Seema M. Jamal (University of Washington)<sup>11</sup>, Jamshed Kanga (University of Kentucky)<sup>27</sup>, Yoonhee Kim (National Human Genome Research Institute)<sup>24, 32</sup>, Michael R. Knowles (University of North Carolina Chapel Hill)<sup>10, 26</sup>, Michael Konstan (Rainbow Babies & Children's Hospital)<sup>27</sup>, Thomas Lahiri (Vermont Children's Hospital at Fletcher Allen Health Care)<sup>27</sup>, Nan Laird (Harvard School of Public Health)<sup>24</sup>, Christoph Lange (Harvard School of Public Health)<sup>24</sup>, Lin Lin (Harvard Medical School)<sup>21</sup>, Xihong Lin (Harvard School of Public Health)<sup>21</sup>, Tin L. Louie (University of Washington)<sup>13, 15, 27</sup>, David Lynch (National Jewish Health)<sup>24</sup>, Barry Make (National Jewish Health)<sup>24</sup>, Thomas R. Martin (University of Washington, VA Puget Sound Medical Center)<sup>10, 21</sup>, Steve C. Mathai (Johns Hopkins University)<sup>32</sup>, Rasika A. Mathias (Johns Hopkins University)<sup>10, 13, 15, 30, 32</sup>, John McNamara (Children's Hospitals and Clinics of Minnesota)<sup>27</sup>, Sharon McNamara (Seattle Children's Hospital)<sup>27</sup>, Deborah Meyers (Wake Forest University)<sup>33</sup>, Susan Millard (DeVos Children's Butterworth Hospital, Spectrum



Health Systems)<sup>27</sup>, Peter Mogayzel (Johns Hopkins University)<sup>27</sup>, Richard Moss (Stanford University)<sup>27</sup>, Tanda Murray (Johns Hopkins University)<sup>30</sup>, Dennis Nielson (University of California at San Francisco)<sup>27</sup>, Blakeslee Noyes (Cardinal Glennon Children's Hospital)<sup>27</sup>, Wanda O'Neal (University of North Carolina Chapel Hill)<sup>26</sup>, David Orenstein (Children's Hospital of Pittsburgh)<sup>27</sup>, Brian O'Sullivan (University of Massachusetts Memorial Health Care)<sup>27</sup>, Rhonda Pace (University of North Carolina Chapel Hill)<sup>26</sup>, Peter Pare (St. Paul's Hospital)<sup>30</sup>, H. Worth Parker (Dartmouth-Hitchcock Medical Center, New Hampshire Cystic Fibrosis Center)<sup>27</sup>, Mary Ann Passero (Rhode Island Hospital)<sup>27</sup>, Elizabeth Perkett (Vanderbilt University)<sup>27</sup>, Adrienne Prestridge (Children's Memorial Hospital)<sup>27</sup>, Nicholas M. Rafaels (Johns Hopkins University)<sup>30</sup>, Bonnie Ramsey (Seattle Children's Hospital, University of Washington)<sup>27</sup>, Elizabeth Regan (National Jewish Health)<sup>24</sup>, Clement Ren (University of Rochester)<sup>27</sup>, George Retsch-Bogart (University of North Carolina Chapel Hill)<sup>27</sup>, Michael Rock (University of Wisconsin Hospital and Clinics)<sup>27</sup>, Antony Rosen (Johns Hopkins University)<sup>32</sup>, Margaret Rosenfeld (Seattle Children's Hospital, University of Washington)<sup>27</sup>, Ingo Ruczinski (Johns Hopkins University School of Public Health)<sup>13, 15, 30</sup>, Andrew Sanford (University of British Columbia)<sup>30</sup>, David Schaeffer (Nemours Children's Clinic)<sup>27</sup>, Cindy Sell (University of North Carolina Chapel Hill)<sup>26</sup>, Daniel Sheehan (Children's Hospital of Buffalo)<sup>27</sup>, Edwin K. Silverman (Brigham and Women's Hospital, Harvard Medical School)<sup>24, 30</sup>, Don Sin (Children's Medical Center of Dayton)<sup>30</sup>, Terry Spencer (Elliot Health System)<sup>27</sup>, Jackie Stonebraker (University of North Carolina Chapel Hill)<sup>26</sup>, Holly K. Tabor (Seattle Children's Hospital, University of Washington)<sup>6, 10, 11, 17, 27</sup>, Laurie Varlotta (St. Christopher's Hospital for Children)<sup>27</sup>, Candelaria I. Vergara (Johns Hopkins University)<sup>30</sup>, Robert Weiss<sup>30</sup>, Fred Wigley (Johns Hopkins University)<sup>32</sup>, Robert A. Wise (Johns Hopkins University)<sup>30</sup>, Fred A. Wright (University of North Carolina Chapel Hill)<sup>26</sup>, Mark M. Wurfel (University of Washington)<sup>10, 14, 21</sup>, Robert Zanni (Monmouth Medical Center)<sup>27</sup>, Fei Zou (University of North Carolina Chapel Hill)<sup>26</sup>

## SeattleGO

Deborah A. Nickerson (University of Washington)<sup>3, 4, 5, 7, 8, 9, 11, 15, 17, 18, 19</sup>, Mark J. Rieder (University of Washington)<sup>4, 11, 13, 15, 16, 17, 19</sup>, Phil Green (University of Washington), Jay Shendure (University of Washington)<sup>1, 8, 14, 16, 17</sup>, Joshua M. Akey (University of Washington)<sup>13, 14, 15</sup>, Michael J. Bamshad (Seattle Children's Hospital, University of Washington)<sup>4, 6, 7, 8, 10, 11, 13, 15, 17, 27</sup>, Carlos D. Bustamante (Stanford University School of Medicine)<sup>3, 13, 15</sup>, David R. Crosslin (University of Washington)<sup>2, 9</sup>, Evan E. Eichler (University of Washington)<sup>19</sup>, P. Keolu Fox<sup>2</sup>, Wenqing Fu (University of Washington)<sup>13</sup>, Adam Gordon (University of Washington)<sup>11</sup>, Simon Gravel (Stanford University School of Medicine)<sup>13, 15</sup>, Gail P. Jarvik (University of Washington)<sup>9, 15</sup>, Jill M. Johnsen (Puget Sound Blood Center, University of Washington)<sup>2</sup>, Mengyuan Kan (Baylor College of Medicine)<sup>13</sup>, Eimear E. Kenny (Stanford University School of Medicine)<sup>3, 13, 15</sup>, Jeffrey M. Kidd (Stanford University School of Medicine)<sup>13, 15</sup>, Fremiet Lara-Garduno (Baylor College of Medicine)<sup>15</sup>, Suzanne M. Leal (Baylor College of Medicine)<sup>1, 13, 15, 16, 17, 19, 20</sup>, Dajiang J. Liu (Baylor College of Medicine)<sup>13, 15</sup>, Sean McGee (University of Washington)<sup>13, 15, 19</sup>, Timothy D. O'Connor (University of Washington)<sup>13</sup>, Bryan Paeper (University of Washington)<sup>16</sup>, Peggy D. Robertson (University of Washington)<sup>4</sup>, Joshua D. Smith (University of Washington)<sup>4, 16, 19</sup>, Jeffrey C. Staples (University of Washington), Jacob A. Tennesen (University of Washington)<sup>13</sup>, Emily H. Turner (University of Washington)<sup>4, 16</sup>, Gao Wang (Baylor College of Medicine)<sup>1, 13, 20</sup>, Qian Yi (University of Washington)<sup>4</sup>

## WHISP

Rebecca Jackson (Ohio State University)<sup>1, 2, 4, 5, 8, 12, 14, 15, 17, 18, 20, 34</sup>, Kari North (University of North Carolina Chapel Hill)<sup>1, 3, 9, 10, 13, 15, 17, 34</sup>, Ulrike Peters (Fred Hutchinson Cancer Research Center)<sup>1, 3, 11, 12, 13, 15, 17, 18, 34</sup>, Christopher S. Carlson (Fred Hutchinson Cancer Research Center, University of Washington)<sup>1, 2, 3, 5, 12, 13, 14, 15, 16, 17, 18, 19, 34</sup>, Garnet Anderson (Fred Hutchinson

Cancer Research Center)<sup>34</sup>, Hoda Anton-Culver (University of California at Irvine)<sup>34</sup>, Themistocles L. Assimes (Stanford University School of Medicine)<sup>5, 9, 11, 34</sup>, Paul L. Auer (Fred Hutchinson Cancer Research Center)<sup>1, 2, 3, 5, 11, 12, 13, 15, 16, 18, 34</sup>, Shirley Beresford (Fred Hutchinson Cancer Research Center)<sup>34</sup>, Chris Bizon (University of North Carolina Chapel Hill)<sup>3, 9, 13, 15, 34</sup>, Henry Black (Rush Medical Center)<sup>34</sup>, Robert Brunner (University of Nevada)<sup>34</sup>, Robert Brzyski (University of Texas Health Science Center San Antonio)<sup>34</sup>, Dale Burwen (National Heart, Lung, and Blood Institute WHI Project Office)<sup>34</sup>, Bette Caan (Kaiser Permanente Division of Research, Oakland, CA)<sup>34</sup>, Cara L. Carty (Fred Hutchinson Cancer Research Center)<sup>18, 34</sup>, Rowan Chlebowski (Los Angeles Biomedical Research Institute)<sup>34</sup>, Steven Cummings (University of California at San Francisco)<sup>34</sup>, J. David Curb\* (University of Hawaii)<sup>9, 18, 34</sup>, Charles B. Eaton (Brown University, Memorial Hospital of Rhode Island)<sup>12, 34</sup>, Leslie Ford (National Heart, Lung, and Blood Institute, National Heart, Lung, and Blood Institute WHI Project Office)<sup>34</sup>, Nora Franceschini (University of North Carolina Chapel Hill)<sup>2, 3, 9, 10, 15, 34</sup>, Stephanie M. Fullerton (University of Washington)<sup>6, 11, 34</sup>, Margery Gass (University of Cincinnati)<sup>34</sup>, Nancy Geller (National Heart, Lung, and Blood Institute WHI Project Office)<sup>34</sup>, Gerardo Heiss (University of North Carolina Chapel Hill)<sup>5, 34</sup>, Barbara V. Howard (Howard University, MedStar Research Institute)<sup>34</sup>, Li Hsu (Fred Hutchinson Cancer Research Center)<sup>1, 13, 15, 18, 34</sup>, Carolyn M. Hutter (Fred Hutchinson Cancer Research Center)<sup>13, 15, 18, 34</sup>, John Ioannidis (Stanford University School of Medicine)<sup>11, 34</sup>, Shuo Jiao (Fred Hutchinson Cancer Research Center)<sup>34</sup>, Karen C. Johnson (University of Tennessee Health Science Center)<sup>3, 34</sup>, Charles Kooperberg (Fred Hutchinson Cancer Research Center)<sup>1, 5, 9, 13, 14, 15, 17, 18, 34</sup>, Lewis Kuller (University of Pittsburgh)<sup>34</sup>, Andrea LaCroix (Fred Hutchinson Cancer Research Center)<sup>34</sup>, Kamakshi Lakshminarayan (University of Minnesota)<sup>18, 34</sup>, Dorothy Lane (State University of New York at Stony Brook)<sup>34</sup>, Ethan M. Lange (University of North Carolina Chapel Hill)<sup>3, 5, 9, 13, 34</sup>, Leslie A. Lange (University of North Carolina Chapel Hill)<sup>1, 2, 3, 5, 9, 12, 13, 15, 17, 18, 20, 25, 34</sup>, Norman Lasser (University of Medicine and Dentistry of New Jersey)<sup>34</sup>, Erin LeBlanc (Kaiser Permanente Center for Health Research, Portland, OR)<sup>34</sup>, Cora E. Lewis (University of Alabama at Birmingham)<sup>25, 34</sup>, Kuo-Ping Li (University of North Carolina Chapel Hill)<sup>9, 34</sup>, Marian Limacher (University of Florida)<sup>34</sup>, Dan-Yu Lin (University of North Carolina Chapel Hill)<sup>1, 3, 9, 13, 15, 34</sup>, Benjamin A. Logsdon (Fred Hutchinson Cancer Research Center)<sup>2, 34</sup>, Shari Ludlam (National Heart, Lung, and Blood Institute WHI Project Office)<sup>34</sup>, JoAnn E. Manson (Brigham and Women's Hospital, Harvard School of Public Health)<sup>34</sup>, Karen Margolis (University of Minnesota)<sup>34</sup>, Lisa Martin (George Washington University Medical Center)<sup>9, 34</sup>, Joan McGowan (National Heart, Lung, and Blood Institute WHI Project Office)<sup>34</sup>, Keri L. Monda (Amgen, Inc.)<sup>1, 15, 34</sup>, Jane Morley Kotchen (Medical College of Wisconsin)<sup>34</sup>, Lauren Nathan (University of California Los Angeles)<sup>34</sup>, Judith Ockene (Fallon Clinic, University of Massachusetts)<sup>34</sup>, Mary Jo O'Sullivan (University of Miami)<sup>34</sup>, Lawrence S. Phillips (Emory University)<sup>34</sup>, Ross L. Prentice (Fred Hutchinson Cancer Research Center)<sup>34</sup>, Alexander P. Reiner (Fred Hutchinson Cancer Research Center, University of Washington)<sup>1, 2, 3, 5, 9, 11, 12, 13, 14, 15, 20, 25, 34</sup>, John Robbins (University of California at Davis)<sup>34</sup>, Jennifer G. Robinson (University of Iowa)<sup>9, 11, 18, 34</sup>, Jacques E. Rossouw (National Heart, Lung, and Blood Institute, National Heart, Lung, and Blood Institute WHI Project Office)<sup>5, 14, 17, 20, 34</sup>, Haleh Sangi-Haghpeykar (Baylor College of Medicine)<sup>34</sup>, Gloria E. Sarto (University of Wisconsin)<sup>34</sup>, Sally Shumaker (Wake Forest University)<sup>34</sup>, Michael S. Simon (Wayne State University)<sup>34</sup>, Marcia L. Stefanick (Stanford University School of Medicine)<sup>34</sup>, Evan Stein (Medical Research Labs)<sup>34</sup>, Hua Tang (Stanford University)<sup>2, 34</sup>, Kira C. Taylor (University of Louisville)<sup>1, 3, 13, 15, 20, 34</sup>, Cynthia A. Thomson (University of Arizona)<sup>34</sup>, Timothy A. Thornton (University of Washington)<sup>13, 15, 18, 34</sup>, Linda Van Horn (Northwestern University)<sup>34</sup>, Mara Vitolins (Wake Forest University)<sup>34</sup>, Jean Wactawski-Wende (University of Buffalo)<sup>34</sup>, Robert Wallace (University of Iowa)<sup>2, 34</sup>, Sylvia Wassertheil-Smoller (Boston University)<sup>18, 34</sup>, Donglin Zeng (University of North Carolina Chapel Hill)<sup>9, 34</sup>

\*deceased

## **NHLBI GO ESP Project Team**

Deborah Applebaum-Bowden (National Heart, Lung, and Blood Institute)<sup>4, 7, 12, 17</sup>, Michael Feolo (National Center for Biotechnology Information)<sup>12</sup>, Weiniu Gan (National Heart, Lung, and Blood Institute)<sup>7, 8, 16, 17</sup>, Dina N. Paltoo (National Heart, Lung, and Blood Institute)<sup>4, 6, 11, 17</sup>, Jacques E. Rossouw (National Heart, Lung, and Blood Institute, National Heart, Lung, and Blood Institute WHI Project Office)<sup>5, 14, 17, 20, 34</sup>, Phyliss Sholinsky (National Heart, Lung, and Blood Institute)<sup>4, 12, 17</sup>, Anne Sturcke (National Center for Biotechnology Information)<sup>12</sup>

## **ESP Groups**

<sup>1</sup>Anthropometry Project Team, <sup>2</sup>Blood Count/Hematology Project Team, <sup>3</sup>Blood Pressure Project Team, <sup>4</sup>Data Flow Working Group, <sup>5</sup>Early MI Project Team, <sup>6</sup>ELSI Working Group, <sup>7</sup>Executive Committee, <sup>8</sup>Family Study Project Team, <sup>9</sup>Lipids Project Team, <sup>10</sup>Lung Project Team, <sup>11</sup>Personal Genomics Project Team, <sup>12</sup>Phenotype and Harmonization Working Group, <sup>13</sup>Population Genetics and Statistical Analysis Working Group, <sup>14</sup>Publications and Presentations Working Group, <sup>15</sup>Quantitative Analysis Ad Hoc Task Group, <sup>16</sup>Sequencing and Genotyping Working Group, <sup>17</sup>Steering Committee, <sup>18</sup>Stroke Project Team, <sup>19</sup>Structural Variation Working Group, <sup>20</sup>Subclinical/Quantitative Project Team

## **ESP Cohorts**

<sup>21</sup>Acute Lung Injury (ALI), <sup>22</sup>Atherosclerosis Risk in Communities (ARIC), <sup>23</sup>Cardiovascular Health Study (CHS), <sup>24</sup>Chronic Obstructive Pulmonary Disease (COPD)Gene, <sup>25</sup>Coronary Artery Risk Development in Young Adults (CARDIA), <sup>26</sup>Cystic Fibrosis (CF), <sup>27</sup>Early Pseudomonas Infection Control (EPIC), <sup>28</sup>Framingham Heart Study (FHS), <sup>29</sup>Jackson Heart Study (JHS), <sup>30</sup>Lung Health Study (LHS), <sup>31</sup>Multi-Ethnic Study of Atherosclerosis (MESA), <sup>32</sup>Pulmonary Arterial Hypertension (PAH), <sup>33</sup>Severe Asthma Research Program (SARP), <sup>34</sup>Women's Health Initiative (WHI)

**Supplemental Table 1: VWF coding sequence variants identified through the NHLBI Exome Sequencing Project.**

| VWF cDNA Position (NM_000552.3) | Variant Pos on Chr 12 (Build 37)  | rs ID                              | Alleles (Build 37)* | MAF (%) EA    | MAF (%) AA    | VWF AA Position (of 2813) | GVS Function      | AA Substitution | PolyPhen Prediction      | GERP Score  | Reported Phenotypic Associations | Refs.      |
|---------------------------------|-----------------------------------|------------------------------------|---------------------|---------------|---------------|---------------------------|-------------------|-----------------|--------------------------|-------------|----------------------------------|------------|
| 21                              | <a href="#">12:6232342</a>        | <a href="#">rs144128523</a>        | G/A                 | 0.0349        | 0             | 7                         | synonymous        | none            | unknown                  | -8.93       |                                  |            |
| 22                              | <a href="#">12:6232341</a>        | unknown                            | C/T                 | 0.0116        | 0.0227        | 8                         | missense          | GLY,ARG         | benign                   | -6.49       |                                  |            |
| 81                              | <a href="#">12:6230479</a>        | <a href="#">rs140419498</a>        | G/A                 | 0.0465        | 0.0454        | 27                        | synonymous        | none            | unknown                  | -11         |                                  | 1          |
| 96                              | <a href="#">12:6230464</a>        | <a href="#">rs146778712</a>        | C/T                 | 0.0349        | 0             | 32                        | synonymous        | none            | unknown                  | -2.27       |                                  |            |
| 97                              | <a href="#">12:6230463</a>        | unknown                            | C/G                 | 0             | 0.0454        | 33                        | missense          | ALA,PRO         | possibly-damaging        | 4.4         |                                  |            |
| 107                             | <a href="#">12:6230453</a>        | unknown                            | C/T                 | 0             | 0.0227        | 36                        | missense          | SER,ASN         | probably-damaging        | 4.38        |                                  |            |
| 114                             | <a href="#">12:6230446</a>        | <a href="#">rs149482309</a>        | G/A                 | 0.4884        | 0.0454        | 38                        | synonymous        | none            | unknown                  | -6.32       |                                  | 1          |
| 135                             | <a href="#">12:6230425</a>        | unknown                            | G/A                 | 0.0116        | 0             | 45                        | synonymous        | none            | unknown                  | 1.33        |                                  |            |
| 162                             | <a href="#">12:6230398</a>        | <a href="#">rs148741727</a>        | C/A                 | 0.0116        | 0             | 54                        | synonymous        | none            | unknown                  | -5.88       |                                  |            |
| 165                             | <a href="#">12:6230395</a>        | unknown                            | T/A                 | 0.0116        | 0             | 55                        | synonymous        | none            | unknown                  | -3.4        |                                  |            |
| 189                             | <a href="#">12:6230371</a>        | <a href="#">rs144310330</a>        | C/T                 | 0.0116        | 0             | 63                        | synonymous        | none            | unknown                  | 3.03        |                                  |            |
| 250                             | <a href="#">12:6220105</a>        | unknown                            | G/A                 | 0.0116        | 0             | 84                        | missense          | LEU,PHE         | probably-damaging        | 4.3         |                                  |            |
| 255                             | <a href="#">12:6220100</a>        | unknown                            | G/A                 | 0.0116        | 0.0227        | 85                        | synonymous        | none            | unknown                  | -2.96       |                                  |            |
| 256                             | <a href="#">12:6220099</a>        | <a href="#">rs140044866</a>        | C/T                 | 0.0116        | 0.0454        | 86                        | missense          | VAL,MET         | probably-damaging        | 5.19        |                                  |            |
| <b>304</b>                      | <b><a href="#">12:6220051</a></b> | <b><a href="#">rs147514785</a></b> | <b>C/T</b>          | <b>0.0116</b> | <b>0.5901</b> | <b>102</b>                | <b>missense</b>   | <b>VAL,MET</b>  | <b>benign</b>            | <b>2.3</b>  |                                  |            |
| 327                             | <a href="#">12:6219745</a>        | unknown                            | G/A                 | 0             | 0.0227        | 109                       | synonymous        | none            | unknown                  | 4.07        |                                  |            |
| 338                             | <a href="#">12:6219734</a>        | unknown                            | T/C                 | 0.0116        | 0             | 113                       | missense          | TYR,CYS         | probably-damaging        | 5.9         |                                  |            |
| <b>385</b>                      | <b><a href="#">12:6219687</a></b> | <b><a href="#">rs61753991</a></b>  | <b>G/T</b>          | <b>0</b>      | <b>0.8171</b> | <b>129</b>                | <b>missense</b>   | <b>LEU,MET</b>  | <b>possibly-damaging</b> | <b>3.73</b> | <b>Type 1 VWD</b>                | <b>1-4</b> |
| <b>390</b>                      | <b><a href="#">12:6219682</a></b> | <b><a href="#">rs2229444</a></b>   | <b>G/A</b>          | <b>0.0581</b> | <b>1.5887</b> | <b>130</b>                | <b>synonymous</b> | <b>none</b>     | <b>unknown</b>           | <b>2.94</b> |                                  | <b>1;4</b> |
| <b>391</b>                      | <b><a href="#">12:6219681</a></b> | <b><a href="#">rs76505074</a></b>  | <b>C/T</b>          | <b>0.0698</b> | <b>1.7022</b> | <b>131</b>                | <b>missense</b>   | <b>GLY,SER</b>  | <b>benign</b>            | <b>4.67</b> |                                  | <b>1;3</b> |
| 409                             | <a href="#">12:6219663</a>        | <a href="#">rs71582882</a>         | C/A                 | 0             | 0.3858        | 137                       | missense          | VAL,LEU         | benign                   | 4.92        |                                  | 1          |
| 418                             | <a href="#">12:6219654</a>        | <a href="#">rs148218885</a>        | T/C                 | 0             | 0.0454        | 140                       | missense          | ILE,VAL         | benign                   | 4.65        |                                  |            |
| 467                             | <a href="#">12:6219605</a>        | unknown                            | T/C                 | 0.0116        | 0             | 156                       | missense          | ASN,SER         | probably-damaging        | 5.81        |                                  |            |

|     |                            |                             |        |        |        |     |            |         |                   |       |                 |       |
|-----|----------------------------|-----------------------------|--------|--------|--------|-----|------------|---------|-------------------|-------|-----------------|-------|
| NA  | <a href="#">12:6219549</a> | unknown                     | A1/R   | 0.0121 | 0      | NA  | frameshift | none    | unknown           | 5.81  |                 |       |
|     |                            |                             | A1: T  |        |        |     |            |         |                   |       |                 |       |
|     |                            |                             | R: TCA |        |        |     |            |         |                   |       |                 |       |
| 537 | <a href="#">12:6204746</a> | unknown                     | G/A    | 0      | 0.0227 | 179 | synonymous | none    | unknown           | 1.89  |                 |       |
| 545 | <a href="#">12:6204738</a> | unknown                     | G/A    | 0.0116 | 0      | 182 | missense   | SER,LEU | probably-damaging | 3.89  |                 |       |
| 546 | <a href="#">12:6204737</a> | <a href="#">rs143054357</a> | C/T    | 0.2326 | 0.0227 | 182 | synonymous | none    | unknown           | -9.71 |                 |       |
| 605 | <a href="#">12:6204678</a> | unknown                     | C/T    | 0.0116 | 0      | 202 | missense   | ARG,GLN | probably-damaging | 4.85  |                 |       |
| 623 | <a href="#">12:6204660</a> | unknown                     | C/G    | 0.0116 | 0      | 208 | missense   | SER,THR | benign            | -4.81 |                 | 4     |
| 682 | <a href="#">12:6184693</a> | unknown                     | G/A    | 0.0116 | 0      | 228 | synonymous | none    | unknown           | 2.84  |                 |       |
| 695 | <a href="#">12:6184680</a> | unknown                     | G/A    | 0      | 0.0227 | 232 | missense   | SER,LEU | probably-damaging | 4.71  |                 |       |
| 706 | <a href="#">12:6184669</a> | <a href="#">rs140912382</a> | G/A    | 0.0116 | 0.0454 | 236 | missense   | ARG,CYS | probably-damaging | 4.71  |                 |       |
| 709 | <a href="#">12:6184666</a> | unknown                     | A/T    | 0.0116 | 0      | 237 | missense   | CYS,SER | probably-damaging | 4.71  |                 |       |
| 727 | <a href="#">12:6184648</a> | unknown                     | G/A    | 0      | 0.0227 | 243 | missense   | PRO,SER | probably-damaging | 4.71  |                 |       |
| 728 | <a href="#">12:6184647</a> | unknown                     | G/A    | 0.0116 | 0      | 243 | missense   | PRO,LEU | probably-damaging | 4.71  |                 |       |
| 730 | <a href="#">12:6184645</a> | <a href="#">rs137987854</a> | C/T    | 0.0116 | 0      | 244 | missense   | GLU,LYS | probably-damaging | 3.79  |                 |       |
| NA  | <a href="#">12:6184594</a> | unknown                     | A1/R   | 0.0242 | 0      | NA  | frameshift | none    | unknown           | 0.17  |                 |       |
|     |                            |                             | A1: GC |        |        |     |            |         |                   |       |                 |       |
|     |                            |                             | R: G   |        |        |     |            |         |                   |       |                 |       |
| 790 | <a href="#">12:6184585</a> | <a href="#">rs145476045</a> | C/T    | 0.0116 | 0      | 264 | missense   | ALA,THR | benign            | -9.42 |                 |       |
| 799 | <a href="#">12:6184576</a> | <a href="#">rs140388695</a> | C/T    | 0.0116 | 0      | 267 | missense   | ALA,THR | benign            | 1.83  |                 |       |
| 817 | <a href="#">12:6184558</a> | <a href="#">rs61753997</a>  | G/A    | 0.0116 | 0      | 273 | missense   | ARG,TRP | probably-damaging | 4.71  | Type 1,3<br>VVD | 1;4-6 |
| 850 | <a href="#">12:6184525</a> | unknown                     | C/T    | 0      | 0.0227 | 284 | missense   | GLY,SER | possibly-damaging | 4.84  |                 |       |
| 869 | <a href="#">12:6184506</a> | unknown                     | G/A    | 0      | 0.0227 | 290 | missense   | ALA,VAL | benign            | -0.35 |                 |       |
| 870 | <a href="#">12:6184505</a> | <a href="#">rs150192701</a> | C/T    | 0      | 0.0454 | 290 | synonymous | none    | unknown           | -9.69 |                 |       |
| 905 | <a href="#">12:6182877</a> | <a href="#">rs140911166</a> | C/G    | 0.0116 | 0      | 302 | missense   | ARG,THR | benign            | 5.07  |                 |       |
| 925 | <a href="#">12:6182857</a> | unknown                     | C/A    | 0      | 0.0454 | 309 | missense   | ALA,SER | benign            | -10.1 |                 | 1     |

|             |                          |                           |            |                |                |            |                      |                  |                          |              |  |            |
|-------------|--------------------------|---------------------------|------------|----------------|----------------|------------|----------------------|------------------|--------------------------|--------------|--|------------|
| <b>954</b>  | <b><u>12:6182828</u></b> | <b><u>rs1800387</u></b>   | <b>A/T</b> | <b>2.5814</b>  | <b>41.1711</b> | <b>318</b> | <b>missense</b>      | <b>ASN,LYS</b>   | <b>benign</b>            | <b>-3.54</b> |  | <b>1;4</b> |
| 974         | <u>12:6182808</u>        | <u>rs11837584</u>         | C/A        | 0              | 0.3858         | 325        | missense             | CYS,PHE          | probably-damaging        | 5.07         |  | 1          |
| 992         | <u>12:6182790</u>        | <u>rs140004667</u>        | C/T        | 0              | 0.0227         | 331        | missense             | CYS,TYR          | probably-damaging        | 5.07         |  |            |
| <b>993</b>  | <b><u>12:6182789</u></b> | <b><u>rs147924974</u></b> | <b>G/T</b> | <b>0</b>       | <b>0.0227</b>  | <b>331</b> | <b>stop-gained</b>   | <b>CYS, stop</b> | <b>unknown</b>           | <b>3.2</b>   |  |            |
| 1002        | <u>12:6181604</u>        | unknown                   | T/A        | 0              | 0.0227         | 334        | synonymous           | none             | unknown                  | 0.99         |  |            |
| 1019        | <u>12:6181587</u>        | unknown                   | C/A        | 0.0116         | 0              | 340        | missense             | GLY,VAL          | probably-damaging        | 0.37         |  |            |
| <b>1037</b> | <b><u>12:6181569</u></b> | <b><u>rs111971143</u></b> | <b>G/A</b> | <b>0.0233</b>  | <b>1.3391</b>  | <b>346</b> | <b>missense</b>      | <b>THR,ILE</b>   | <b>benign</b>            | <b>5.55</b>  |  | <b>1;3</b> |
| 1050        | <u>12:6181556</u>        | <u>rs141009309</u>        | G/A        | 0              | 0.0908         | 350        | synonymous           | none             | unknown                  | -8.84        |  |            |
| 1067        | <u>12:6181539</u>        | unknown                   | C/T        | 0.0233         | 0              | 356        | missense             | ARG,HIS          | possibly-damaging        | 0.7          |  |            |
| 1077        | <u>12:6181529</u>        | <u>rs71582884</u>         | G/A        | 0.0814         | 0.0227         | 359        | synonymous           | none             | unknown                  | -11.1        |  | 1          |
| 1091        | <u>12:6181515</u>        | unknown                   | G/A        | 0.0116         | 0              | 364        | missense             | SER,PHE          | benign                   | 2.66         |  |            |
| 1106        | <u>12:6181500</u>        | unknown                   | G/A        | 0.0116         | 0              | 369        | missense             | THR,ILE          | probably-damaging        | 5.55         |  |            |
| 1107        | <u>12:6181499</u>        | <u>rs149640698</u>        | G/C        | 0              | 0.1135         | 369        | synonymous           | none             | unknown                  | 2.31         |  |            |
| 1157        | <u>12:6174439</u>        | unknown                   | C/A        | 0.0116         | 0              | 386        | missense-near-splice | GLY,VAL          | possibly-damaging        | 4.98         |  |            |
| <b>1173</b> | <b><u>12:6174423</u></b> | <b><u>rs1800375</u></b>   | <b>T/A</b> | <b>12.6977</b> | <b>46.6409</b> | <b>391</b> | <b>synonymous</b>    | <b>none</b>      | <b>unknown</b>           | <b>-5.91</b> |  | <b>1;4</b> |
| 1179        | <u>12:6174417</u>        | unknown                   | T/C        | 0.0116         | 0              | 393        | synonymous           | none             | unknown                  | -9.97        |  |            |
| <b>1182</b> | <b><u>12:6174414</u></b> | <b><u>rs1800376</u></b>   | <b>T/G</b> | <b>12.6977</b> | <b>49.4326</b> | <b>394</b> | <b>synonymous</b>    | <b>none</b>      | <b>unknown</b>           | <b>2.08</b>  |  | <b>1;4</b> |
| NA          | <u>12:6174356</u>        | unknown                   | A1/R       | 0.0121         | 0              | NA         | frameshift           | none             | unknown                  | 1.06         |  |            |
|             |                          |                           | A1: GC     |                |                |            |                      |                  |                          |              |  |            |
|             |                          |                           | R: G       |                |                |            |                      |                  |                          |              |  |            |
| 1240        | <u>12:6174356</u>        | unknown                   | G/T        | 0              | 0.0227         | 414        | missense             | LEU,MET          | probably-damaging        | 1.06         |  |            |
| 1247        | <u>12:6174349</u>        | <u>rs137950753</u>        | C/T        | 0              | 0.0227         | 416        | missense             | ARG,GLN          | benign                   | 0.1          |  | 1          |
| 1283        | <u>12:6174313</u>        | unknown                   | T/A        | 0.0116         | 0              | 428        | missense             | GLU,VAL          | probably-damaging        | 4.98         |  |            |
| <b>1306</b> | <b><u>12:6173538</u></b> | <b><u>rs145443126</u></b> | <b>G/A</b> | <b>0</b>       | <b>0.1135</b>  | <b>436</b> | <b>missense</b>      | <b>ARG,CYS</b>   | <b>possibly-damaging</b> | <b>4.53</b>  |  | <b>3</b>   |
| 1311        | <u>12:6173533</u>        | unknown                   | G/A        | 0.0116         | 0              | 437        | synonymous           | none             | unknown                  | -3.97        |  |            |

|      |                            |                             |     |         |         |     |            |          |                   |       |             |     |
|------|----------------------------|-----------------------------|-----|---------|---------|-----|------------|----------|-------------------|-------|-------------|-----|
| 1319 | <a href="#">12:6173525</a> | unknown                     | C/T | 0       | 0.0227  | 440 | missense   | CYS, TYR | probably-damaging | 4.53  |             |     |
| 1324 | <a href="#">12:6173520</a> | <a href="#">rs148247755</a> | G/A | 0.0116  | 0       | 442 | missense   | ARG, CYS | probably-damaging | 4.53  |             |     |
| 1325 | <a href="#">12:6173519</a> | unknown                     | C/T | 0.0233  | 0       | 442 | missense   | ARG, HIS | probably-damaging | 4.53  | Type 2M VWD | 7   |
| 1329 | <a href="#">12:6173515</a> | <a href="#">rs142404899</a> | G/A | 0.0349  | 0       | 443 | synonymous | none     | unknown           | -9.07 |             | 1   |
| 1330 | <a href="#">12:6173514</a> | <a href="#">rs149116506</a> | C/T | 0       | 0.0227  | 444 | missense   | VAL, ILE | probably-damaging | 4.53  |             |     |
| 1339 | <a href="#">12:6173505</a> | unknown                     | G/A | 0.0116  | 0       | 447 | missense   | ARG, TRP | probably-damaging | 4.53  |             |     |
| 1343 | <a href="#">12:6173501</a> | unknown                     | A/G | 0       | 0.0227  | 448 | missense   | LEU, PRO | probably-damaging | 4.53  |             |     |
| 1393 | <a href="#">12:6173451</a> | unknown                     | C/G | 0.0116  | 0       | 465 | missense   | ALA, PRO | possibly-damaging | 2.37  |             |     |
| 1410 | <a href="#">12:6173434</a> | <a href="#">rs111867665</a> | G/A | 0       | 0.0908  | 470 | synonymous | none     | unknown           | -3.19 |             |     |
| 1411 | <a href="#">12:6173433</a> | <a href="#">rs1800377</a>   | C/T | 11.0233 | 13.8675 | 471 | missense   | VAL, ILE | benign            | -2.9  |             | 1:4 |
| 1441 | <a href="#">12:6172212</a> | unknown                     | G/A | 0.0233  | 0       | 481 | missense   | ARG, CYS | probably-damaging | 3.93  |             | 1   |
| 1451 | <a href="#">12:6172202</a> | <a href="#">rs1800378</a>   | T/C | 34.314  | 21.9246 | 484 | missense   | HIS, ARG | possibly-damaging | 1.25  |             | 1:4 |
| 1452 | <a href="#">12:6172201</a> | <a href="#">rs147913451</a> | A/T | 0       | 0.0227  | 484 | missense   | HIS, GLN | possibly-damaging | 2.83  |             |     |
| 1456 | <a href="#">12:6172197</a> | unknown                     | C/T | 0.0116  | 0       | 486 | missense   | VAL, MET | probably-damaging | 3.04  |             |     |
| 1461 | <a href="#">12:6172192</a> | unknown                     | C/T | 0.0116  | 0       | 487 | synonymous | none     | unknown           | 2     |             |     |
| 1463 | <a href="#">12:6172190</a> | <a href="#">rs144817575</a> | G/C | 0.0116  | 0.2043  | 488 | missense   | ALA, GLY | benign            | 0.59  |             | 1:3 |
| 1467 | <a href="#">12:6172186</a> | unknown                     | G/A | 0.0116  | 0       | 489 | synonymous | none     | unknown           | -6.75 |             |     |
| 1471 | <a href="#">12:6172182</a> | unknown                     | G/A | 0.0116  | 0       | 491 | missense   | ARG, CYS | probably-damaging | 4.88  |             |     |
| 1483 | <a href="#">12:6172170</a> | unknown                     | C/T | 0       | 0.0227  | 495 | missense   | GLY, ARG | possibly-damaging | 1.33  |             |     |
| 1514 | <a href="#">12:6172139</a> | <a href="#">rs139830291</a> | C/T | 0.0349  | 0.0454  | 505 | missense   | ARG, HIS | probably-damaging | 5.18  |             |     |
| 1515 | <a href="#">12:6172138</a> | unknown                     | G/A | 0.0116  | 0       | 505 | synonymous | none     | unknown           | -10.4 |             |     |
| 1516 | <a href="#">12:6172137</a> | unknown                     | C/T | 0       | 0.0227  | 506 | missense   | GLY, ARG | probably-damaging | 5.18  |             | 1   |
| 1548 | <a href="#">12:6167196</a> | <a href="#">rs1800379</a>   | G/A | 35.0769 | 41.2608 | 516 | synonymous | none     | unknown           | -1.81 |             | 1:4 |

|             |                                   |                                    |            |               |               |            |                             |                |                          |              |                   |              |
|-------------|-----------------------------------|------------------------------------|------------|---------------|---------------|------------|-----------------------------|----------------|--------------------------|--------------|-------------------|--------------|
| 1551        | <a href="#">12:6167193</a>        | <a href="#">rs142956629</a>        | G/T        | 0             | 0.0682        | 517        | synonymous                  | none           | unknown                  | -9.79        |                   |              |
| <b>1596</b> | <b><a href="#">12:6167148</a></b> | <b><a href="#">rs111240043</a></b> | <b>G/A</b> | <b>0.0233</b> | <b>0.6809</b> | <b>532</b> | <b>synonymous</b>           | <b>none</b>    | <b>unknown</b>           | <b>-9.66</b> |                   | 1            |
| 1613        | <a href="#">12:6167131</a>        | <a href="#">rs139196998</a>        | G/A        | 0             | 0.0227        | 538        | missense                    | PRO,LEU        | probably-damaging        | 4.94         |                   | 1            |
| 1614        | <a href="#">12:6167130</a>        | <a href="#">rs138268387</a>        | G/A        | 0.0582        | 0.0681        | 538        | synonymous                  | none           | unknown                  | -2.83        |                   | 1:4          |
| <b>1625</b> | <b><a href="#">12:6167119</a></b> | <b><a href="#">rs141649383</a></b> | <b>G/C</b> | <b>0.093</b>  | <b>0</b>      | <b>542</b> | <b>missense</b>             | <b>ALA,GLY</b> | <b>possibly-damaging</b> | <b>-0.4</b>  | <b>Type 3 VWD</b> |              |
| 1626        | <a href="#">12:6167118</a>        | <a href="#">rs35365059</a>         | C/T        | 8.593         | 3.8584        | 542        | synonymous                  | none           | unknown                  | -0.29        |                   | 1:4          |
| 1638        | <a href="#">12:6167106</a>        | unknown                            | C/T        | 0             | 0.0227        | 546        | synonymous                  | none           | unknown                  | 1.99         |                   |              |
| 1681        | <a href="#">12:6167063</a>        | unknown                            | C/T        | 0.0116        | 0             | 561        | missense                    | ASP,ASN        | probably-damaging        | 3.81         |                   |              |
| 1722        | <a href="#">12:6167022</a>        | unknown                            | C/T        | 0.0233        | 0             | 574        | synonymous                  | none           | unknown                  | 1.4          |                   |              |
| <b>1728</b> | <b><a href="#">12:6167016</a></b> | <b><a href="#">rs150146744</a></b> | <b>C/A</b> | <b>0.0233</b> | <b>0.0227</b> | <b>576</b> | <b>missense-near-splice</b> | <b>MET,ILE</b> | <b>benign</b>            | <b>1.43</b>  | <b>Type 1 VWD</b> | <b>1:2,4</b> |
| 1753        | <a href="#">12:6166215</a>        | <a href="#">rs141777100</a>        | C/T        | 0             | 0.1172        | 585        | missense                    | ALA,THR        | probably-damaging        | -0.07        |                   |              |
| 1776        | <a href="#">12:6166192</a>        | unknown                            | G/A        | 0             | 0.0235        | 592        | synonymous                  | none           | unknown                  | 4.05         |                   |              |
| <b>1794</b> | <b><a href="#">12:6166174</a></b> | <b><a href="#">rs35302737</a></b>  | <b>G/A</b> | <b>0.0716</b> | <b>5.9507</b> | <b>598</b> | <b>synonymous</b>           | <b>none</b>    | <b>unknown</b>           | <b>-9.92</b> |                   | 1            |
| 1817        | <a href="#">12:6166151</a>        | unknown                            | C/T        | 0             | 0.2431        | 606        | missense                    | ARG,GLN        | benign                   | -3.72        |                   |              |
| 1848        | <a href="#">12:6166120</a>        | unknown                            | C/G        | 0.0126        | 0             | 616        | synonymous                  | none           | unknown                  | -9.19        |                   |              |
| 1892        | <a href="#">12:6166076</a>        | unknown                            | G/A        | 0.029         | 0.1659        | 631        | missense                    | ALA,VAL        | probably-damaging        | 4.05         |                   | 3            |
| <b>1922</b> | <b><a href="#">12:6166046</a></b> | <b>unknown</b>                     | <b>G/A</b> | <b>0.075</b>  | <b>0.148</b>  | <b>641</b> | <b>missense</b>             | <b>ALA,VAL</b> | <b>possibly-damaging</b> | <b>-5.89</b> | <b>Type 1 VWD</b> | <b>4:8,9</b> |
| 2071        | <a href="#">12:6161824</a>        | unknown                            | G/T        | 0.0233        | 0.0227        | 691        | missense                    | PRO,THR        | probably-damaging        | 2.93         |                   |              |
| 2094        | <a href="#">12:6161801</a>        | <a href="#">rs141590700</a>        | C/T        | 0             | 0.0227        | 698        | synonymous                  | none           | unknown                  | -1.64        |                   |              |
| 2098        | <a href="#">12:6161797</a>        | unknown                            | C/G        | 0.0116        | 0             | 700        | missense                    | ASP,HIS        | benign                   | -2.31        |                   |              |
| 2103        | <a href="#">12:6161792</a>        | <a href="#">rs78995469</a>         | G/A        | 0.0116        | 0.4766        | 701        | synonymous                  | none           | unknown                  | -4.65        |                   | 1            |
| 2108        | <a href="#">12:6161787</a>        | unknown                            | G/A        | 0.0233        | 0             | 703        | missense                    | PRO,LEU        | probably-damaging        | 4.77         |                   |              |
| 2134        | <a href="#">12:6161761</a>        | unknown                            | C/T        | 0.0116        | 0             | 712        | missense                    | ASP,ASN        | probably-damaging        | 4.77         |                   |              |
| 2136        | <a href="#">12:6161759</a>        | <a href="#">rs146468788</a>        | G/A        | 0             | 0.0908        | 712        | synonymous                  | none           | unknown                  | -4.21        |                   |              |



|             |                                   |                                    |            |                |                |            |                 |                |                          |              |                               |                   |
|-------------|-----------------------------------|------------------------------------|------------|----------------|----------------|------------|-----------------|----------------|--------------------------|--------------|-------------------------------|-------------------|
| 2176        | <a href="#">12:6161719</a>        | unknown                            | G/A        | 0.0116         | 0              | 726        | missense        | HIS,TYR        | probably-damaging        | 4.77         |                               |                   |
| 2207        | <a href="#">12:6155963</a>        | <a href="#">rs149168790</a>        | A/G        | 0              | 0.0227         | 736        | missense        | MET,THR        | benign                   | 3.46         |                               |                   |
| 2220        | <a href="#">12:6155950</a>        | <a href="#">rs16932374</a>         | C/T        | 0.093          | 18.0663        | 740        | missense        | MET,ILE        | benign                   | -2.93        | Type 1,2M VWD                 | 1;3;4;8-10        |
| 2233        | <a href="#">12:6155937</a>        | unknown                            | C/T        | 0.0116         | 0.0227         | 745        | missense        | GLY,ARG        | probably-damaging        | 3.46         |                               |                   |
| 2295        | <a href="#">12:6153604</a>        | <a href="#">rs150043098</a>        | T/C        | 0              | 0.0908         | 765        | synonymous      | none           | unknown                  | -2.42        |                               | 1                 |
| 2305        | <a href="#">12:6153594</a>        | <a href="#">rs143145764</a>        | G/A        | 0              | 0.0681         | 769        | missense        | PRO,SER        | benign                   | 2.14         |                               |                   |
| 2312        | <a href="#">12:6153587</a>        | unknown                            | A/G        | 0              | 0.0227         | 771        | missense        | MET,THR        | probably-damaging        | 4.11         |                               | 1                 |
| 2332        | <a href="#">12:6153567</a>        | <a href="#">rs146892641</a>        | C/T        | 0              | 0.0681         | 778        | missense        | ALA,THR        | benign                   | 3.27         |                               |                   |
| <b>2340</b> | <b><a href="#">12:6153559</a></b> | <b><a href="#">rs143904314</a></b> | <b>G/C</b> | <b>0</b>       | <b>0.1816</b>  | <b>780</b> | <b>missense</b> | <b>ASN,LYS</b> | <b>benign</b>            | <b>3.27</b>  |                               |                   |
| 2344        | <a href="#">12:6153555</a>        | <a href="#">rs61748471</a>         | G/A        | 0.0116         | 0.0454         | 782        | missense        | ARG,TRP        | possibly-damaging        | 0.94         | Type 2N VWD                   | 4;7;11            |
| 2345        | <a href="#">12:6153554</a>        | <a href="#">rs61748472</a>         | C/G        | 0.0116         | 0              | 782        | missense        | ARG,PRO        | probably-damaging        | -1.37        |                               |                   |
| <b>2365</b> | <b><a href="#">12:6153534</a></b> | <b><a href="#">rs1063856</a></b>   | <b>T/C</b> | <b>35.7442</b> | <b>43.1684</b> | <b>789</b> | <b>missense</b> | <b>THR,ALA</b> | <b>benign</b>            | <b>2.17</b>  | <b>High VWF, risk CHD, VT</b> | <b>1;4;12-14</b>  |
| 2385        | <a href="#">12:6153514</a>        | <a href="#">rs1063857</a>          | A/G        | 35.7558        | 43.1911        | 795        | synonymous      | none           | unknown                  | -5.47        |                               | 1                 |
| 2389        | <a href="#">12:6153510</a>        | unknown                            | G/A        | 0.0233         | 0.0227         | 797        | synonymous      | none           | unknown                  | 1.08         |                               |                   |
| 2409        | <a href="#">12:6153490</a>        | unknown                            | G/C        | 0.0116         | 0              | 803        | synonymous      | none           | unknown                  | 3.2          |                               |                   |
| <b>2451</b> | <b><a href="#">12:6145649</a></b> | <b><a href="#">rs57950734</a></b>  | <b>A/T</b> | <b>0.0349</b>  | <b>11.6659</b> | <b>817</b> | <b>missense</b> | <b>HIS,GLN</b> | <b>probably-damaging</b> | <b>-0.03</b> | <b>Type 2N</b>                | <b>1;3;4;7;11</b> |
| 2477        | <a href="#">12:6145623</a>        | unknown                            | C/T        | 0.0116         | 0              | 826        | missense        | ARG,LYS        | benign                   | 4.97         |                               |                   |
| 2478        | <a href="#">12:6145622</a>        | unknown                            | C/G        | 0.0116         | 0              | 826        | missense        | ARG,SER        | probably-damaging        | -1.62        |                               |                   |
| <b>2510</b> | <b><a href="#">12:6145590</a></b> | <b><a href="#">rs75645183</a></b>  | <b>G/T</b> | <b>0</b>       | <b>2.2015</b>  | <b>837</b> | <b>missense</b> | <b>ALA,ASP</b> | <b>benign</b>            | <b>3.05</b>  |                               | <b>1;3</b>        |
| 2513        | <a href="#">12:6145587</a>        | <a href="#">rs149520234</a>        | G/A        | 0              | 0.0454         | 838        | missense        | PRO,LEU        | probably-damaging        | 4.04         |                               |                   |
| 2536        | <a href="#">12:6145564</a>        | unknown                            | A/C        | 0.0233         | 0              | 846        | missense        | CYS,GLY        | probably-damaging        | 4.79         |                               |                   |
| 2555        | <a href="#">12:6143984</a>        | <a href="#">rs216321</a>           | C/T        | 8.9302         | 5.0386         | 852        | missense        | GLN,ARG        | benign                   | 0.42         |                               | 1;4               |
| 2561        | <a href="#">12:6143978</a>        | <a href="#">rs41276738</a>         | C/T        | 0.5581         | 0.0454         | 854        | missense        | ARG,GLN        | probably-damaging        | 5.56         | Type 1,2N                     | 1-4;7;8;15-17     |
| 2575        | <a href="#">12:6143964</a>        | unknown                            | T/C        | 0              | 0.0227         | 859        | missense        | THR,ALA        | possibly-damaging        | 4.38         |                               |                   |
| 2586        | <a href="#">12:6143953</a>        | <a href="#">rs34510401</a>         | C/A        | 0.0814         | 0              | 862        | synonymous      | none           | unknown                  | 2.76         |                               | 1                 |

|             |                                   |                                    |                                     |               |               |            |                        |                |                   |              |          |          |
|-------------|-----------------------------------|------------------------------------|-------------------------------------|---------------|---------------|------------|------------------------|----------------|-------------------|--------------|----------|----------|
| 2591        | <a href="#">12:6143948</a>        | <a href="#">rs146405753</a>        | T/C                                 | 0             | 0.0227        | 864        | missense               | ASP,GLY        | possibly-damaging | 5.56         |          |          |
| 2603        | <a href="#">12:6143936</a>        | unknown                            | G/C                                 | 0             | 0.0227        | 868        | missense               | SER,CYS        | probably-damaging | 5.56         |          |          |
| <b>2610</b> | <b><a href="#">12:6143929</a></b> | <b><a href="#">rs141982646</a></b> | <b>G/A</b>                          | <b>0</b>      | <b>0.3631</b> | <b>870</b> | <b>synonymous</b>      | <b>none</b>    | <b>unknown</b>    | <b>-3.59</b> |          | 1        |
| 2611        | <a href="#">12:6143928</a>        | <a href="#">rs148122508</a>        | C/T                                 | 0             | 0.0227        | 871        | missense               | GLY,SER        | probably-damaging | 5.56         |          |          |
| <b>2626</b> | <b><a href="#">12:6143913</a></b> | <b><a href="#">rs143762054</a></b> | <b>G/A</b>                          | <b>0</b>      | <b>0.1362</b> | <b>876</b> | <b>missense</b>        | <b>LEU,PHE</b> | <b>benign</b>     | <b>2.72</b>  |          |          |
| 2632        | <a href="#">12:6143907</a>        | <a href="#">rs148969007</a>        | A/T                                 | 0             | 0.0227        | 878        | missense               | PHE,ILE        | probably-damaging | 5.45         |          |          |
| 2651        | <a href="#">12:6143888</a>        | <a href="#">rs146850658</a>        | A/C                                 | 0             | 0.0227        | 884        | missense               | LEU,ARG        | benign            | 4.1          |          |          |
| 2662        | <a href="#">12:6143877</a>        | unknown                            | C/G                                 | 0             | 0.0227        | 888        | missense               | GLU,GLN        | benign            | 3.22         |          |          |
| 2674        | <a href="#">12:6143865</a>        | unknown                            | C/T                                 | 0             | 0.0227        | 892        | missense               | VAL,ILE        | benign            | 4.57         |          | 1        |
| NA          | <a href="#">12:6140736</a>        | unknown                            | A1/R<br>A1: G<br>R: GCAGTAA<br>TCCT | 0.0242        | 0             | NA         | frameshift-near-splice | none           | unknown           | -1.38        |          |          |
| 2695        | <a href="#">12:6140735</a>        | <a href="#">rs142135013</a>        | C/T                                 | 0             | 0.0227        | 899        | missense               | GLY,SER        | benign            | 5.58         |          | 1        |
| <b>2739</b> | <b><a href="#">12:6140691</a></b> | <b><a href="#">rs35191786</a></b>  | <b>T/G</b>                          | <b>0.0233</b> | <b>0.1816</b> | <b>913</b> | <b>synonymous</b>      | <b>none</b>    | <b>unknown</b>    | <b>-3.11</b> |          | 1;4      |
| 2771        | <a href="#">12:6140659</a>        | <a href="#">rs33978901</a>         | C/T                                 | 2.1163        | 0.2951        | 924        | missense               | ARG,GLN        | probably-damaging | 3.75         | Type1,2N | 1-4;8;18 |
| 2775        | <a href="#">12:6140655</a>        | unknown                            | A/G                                 | 0             | 0.0227        | 925        | synonymous             | none           | unknown           | 4.67         |          |          |
| 2785        | <a href="#">12:6140645</a>        | unknown                            | C/T                                 | 0             | 0.0227        | 929        | missense               | VAL,MET        | benign            | -0.15        |          |          |
| 2801        | <a href="#">12:6140629</a>        | <a href="#">rs142563352</a>        | A/G                                 | 0             | 0.0227        | 934        | missense               | ILE,THR        | possibly-damaging | 5.58         |          |          |
| <b>2814</b> | <b><a href="#">12:6140616</a></b> | <b><a href="#">rs139622018</a></b> | <b>G/A</b>                          | <b>0.0233</b> | <b>0.1589</b> | <b>938</b> | <b>synonymous</b>      | <b>none</b>    | <b>unknown</b>    | <b>-10.1</b> |          | 1        |
| 2815        | <a href="#">12:6140615</a>        | <a href="#">rs147408448</a>        | C/T                                 | 0             | 0.0227        | 939        | missense               | GLY,ARG        | probably-damaging | 4.7          |          | 1        |
| 2839        | <a href="#">12:6138636</a>        | <a href="#">rs142861582</a>        | T/C                                 | 0.0116        | 0.0227        | 947        | missense               | MET,VAL        | benign            | -3.8         |          | 1        |
| 2863        | <a href="#">12:6138612</a>        | unknown                            | C/A                                 | 0             | 0.0227        | 955        | missense               | VAL,LEU        | possibly-damaging | 3.67         |          |          |
| 2878        | <a href="#">12:6138597</a>        | unknown                            | G/A                                 | 0             | 0.0227        | 960        | missense               | ARG,TRP        | probably-damaging | 4.58         |          |          |
| 2880        | <a href="#">12:6138595</a>        | <a href="#">rs1800380</a>          | C/T                                 | 25.1395       | 31.1621       | 960        | synonymous             | none           | unknown           | -5.07        |          | 1;4      |
| 2895        | <a href="#">12:6138580</a>        | <a href="#">rs144225315</a>        | C/G                                 | 0             | 0.0227        | 965        | synonymous             | none           | unknown           | 2.54         |          | 1        |
| 2899        | <a href="#">12:6138576</a>        | <a href="#">rs149573046</a>        | C/T                                 | 0             | 0.0227        | 967        | missense               | GLY,SER        | benign            | 3.69         |          |          |

|             |                          |                           |                          |               |               |             |                   |                |                          |              |                |            |
|-------------|--------------------------|---------------------------|--------------------------|---------------|---------------|-------------|-------------------|----------------|--------------------------|--------------|----------------|------------|
| <b>2900</b> | <b><u>12:6138575</u></b> | <b><u>rs141087261</u></b> | <b>C/T</b>               | <b>0</b>      | <b>2.4739</b> | <b>967</b>  | <b>missense</b>   | <b>GLY,ASP</b> | <b>benign</b>            | <b>3.69</b>  |                | <b>3</b>   |
| 2906        | <u>12:6138569</u>        | unknown                   | G/A                      | 0             | 0.0227        | 969         | missense          | ALA,VAL        | possibly-damaging        | 1.41         |                | 1          |
| <b>2913</b> | <b><u>12:6138562</u></b> | <b>unknown</b>            | <b>G/A</b>               | <b>0.0116</b> | <b>0</b>      | <b>971</b>  | <b>synonymous</b> | <b>none</b>    | <b>unknown</b>           | <b>-9.16</b> |                | <b>4</b>   |
| 2914        | <u>12:6138561</u>        | <u>rs150418484</u>        | C/T                      | 0.0116        | 0             | 972         | missense          | VAL,MET        | probably-damaging        | 2.65         |                |            |
| 2943        | <u>12:6138532</u>        | unknown                   | G/A                      | 0.0116        | 0.0227        | 981         | synonymous        | none           | unknown                  | -9.16        |                |            |
| 2944        | <u>12:6138531</u>        | unknown                   | C/G                      | 0.0116        | 0             | 982         | missense          | VAL,LEU        | probably-damaging        | 4.58         |                |            |
| 3008        | <u>12:6135172</u>        | <u>rs141477932</u>        | T/C                      | 0.0233        | 0             | 1003        | missense          | GLN,ARG        | probably-damaging        | 4.84         |                |            |
| 3013        | <u>12:6135167</u>        | unknown                   | T/C                      | 0.0116        | 0             | 1005        | missense          | ASN,ASP        | probably-damaging        | 4.84         |                |            |
| 3022        | <u>12:6135158</u>        | <u>rs138940478</u>        | T/C                      | 0.0116        | 0             | 1008        | missense          | THR,ALA        | probably-damaging        | 4.84         |                |            |
| 3023        | <u>12:6135157</u>        | unknown                   | G/T                      | 0.0116        | 0             | 1008        | missense          | THR,ASN        | probably-damaging        | 4.84         |                |            |
| 3087        | <u>12:6135093</u>        | unknown                   | C/T                      | 0.0116        | 0             | 1029        | synonymous        | none           | unknown                  | -4.29        |                |            |
| <b>3089</b> | <b><u>12:6135091</u></b> | <b><u>rs145125264</u></b> | <b>T/C</b>               | <b>0</b>      | <b>0.749</b>  | <b>1030</b> | <b>missense</b>   | <b>GLN,ARG</b> | <b>probably-damaging</b> | <b>2.27</b>  |                | <b>1:3</b> |
| 3092        | <u>12:6135088</u>        | <u>rs141412860</u>        | C/T                      | 0             | 0.0227        | 1031        | missense          | CYS,TYR        | probably-damaging        | 4.69         |                |            |
| 3103        | <u>12:6135077</u>        | <u>rs146648301</u>        | T/C                      | 0.0116        | 0             | 1035        | missense          | ARG,GLY        | benign                   | 2.26         |                | 1          |
| NA          | <u>12:6135076</u>        | unknown                   | A1/R<br>A1: C<br>R: CTGG | 0.1696        | 1.5002        | NA          | coding            | none           | unknown                  | -0.97        |                |            |
| 3175        | <u>12:6134793</u>        | unknown                   | A/G                      | 0.0117        | 0             | 1059        | missense          | SER,PRO        | possibly-damaging        | 2.12         |                |            |
| <b>3232</b> | <b><u>12:6132944</u></b> | <b>unknown</b>            | <b>C/T</b>               | <b>0.0116</b> | <b>0</b>      | <b>1078</b> | <b>missense</b>   | <b>GLU,LYS</b> | <b>probably-damaging</b> | <b>5.11</b>  | <b>Type 2N</b> | <b>4</b>   |
| <b>3240</b> | <b><u>12:6132936</u></b> | <b><u>rs4021576</u></b>   | <b>A/G</b>               | <b>0</b>      | <b>6.0046</b> | <b>1080</b> | <b>synonymous</b> | <b>none</b>    | <b>unknown</b>           | <b>4.22</b>  |                | <b>4</b>   |
| <b>3281</b> | <b><u>12:6132895</u></b> | <b>unknown</b>            | <b>A/G</b>               | <b>0.0116</b> | <b>0</b>      | <b>1094</b> | <b>missense</b>   | <b>ILE,THR</b> | <b>possibly-damaging</b> | <b>5.11</b>  | <b>Type 1</b>  | <b>8</b>   |
| 3291        | <u>12:6132885</u>        | <u>rs149895348</u>        | G/A                      | 0.0116        | 0.0456        | 1097        | synonymous        | none           | unknown                  | -10.2        |                |            |
| 3303        | <u>12:6132873</u>        | unknown                   | G/A                      | 0             | 0.0228        | 1101        | synonymous        | none           | unknown                  | -10.2        |                |            |
| 3365        | <u>12:6132811</u>        | unknown                   | G/A                      | 0.0116        | 0             | 1122        | missense          | THR,MET        | probably-damaging        | 4.21         |                | 1          |

|             |                                   |                                   |            |               |                |             |                      |             |                   |              |                   |     |
|-------------|-----------------------------------|-----------------------------------|------------|---------------|----------------|-------------|----------------------|-------------|-------------------|--------------|-------------------|-----|
| 3366        | <a href="#">12:6132810</a>        | unknown                           | C/T        | 0             | 0.0227         | 1122        | synonymous           | none        | unknown           | -10.2        |                   |     |
| 3379        | <a href="#">12:6132797</a>        | <a href="#">rs139579968</a>       | G/A        | 0.0116        | 0              | 1127        | missense-near-splice | PRO,SER     | probably-damaging | 5.11         |                   |     |
| 3547        | <a href="#">12:6131193</a>        | <a href="#">rs147818186</a>       | G/C        | 0.0116        | 0              | 1183        | missense             | LEU,VAL     | probably-damaging | 3.8          |                   |     |
| 3549        | <a href="#">12:6131191</a>        | <a href="#">rs144447692</a>       | C/G        | 0.0116        | 0              | 1183        | synonymous           | none        | unknown           | 4.69         |                   |     |
| 3570        | <a href="#">12:6131170</a>        | unknown                           | G/A        | 0.0116        | 0              | 1190        | synonymous           | none        | unknown           | 1.82         |                   |     |
| 3571        | <a href="#">12:6131169</a>        | unknown                           | C/T        | 0             | 0.0227         | 1191        | missense             | VAL,ILE     | benign            | -3.38        |                   |     |
| <b>3579</b> | <b><a href="#">12:6131161</a></b> | <b><a href="#">rs16933969</a></b> | <b>A/G</b> | <b>0.1047</b> | <b>21.9246</b> | <b>1193</b> | <b>synonymous</b>    | <b>none</b> | <b>unknown</b>    | <b>-3.61</b> |                   | 1;4 |
| 3583        | <a href="#">12:6131157</a>        | unknown                           | C/A        | 0.0116        | 0              | 1195        | missense             | ASP,TYR     | probably-damaging | 4.74         | Type 2A           |     |
| 3590        | <a href="#">12:6131150</a>        | unknown                           | G/A        | 0.0116        | 0              | 1197        | missense             | PRO,LEU     | probably-damaging | 4.74         |                   |     |
| 3594        | <a href="#">12:6131146</a>        | unknown                           | C/A        | 0.0116        | 0              | 1198        | synonymous           | none        | unknown           | 3.85         |                   |     |
| 3613        | <a href="#">12:6131127</a>        | unknown                           | G/A        | 0.0116        | 0              | 1205        | missense             | ARG,CYS     | probably-damaging | 4.74         |                   |     |
| 3686        | <a href="#">12:6128898</a>        | unknown                           | A/C        | 0.0117        | 0.2499         | 1229        | missense             | VAL,GLY     | benign            | 4.94         | Type 1            | 2-4 |
| 3692        | <a href="#">12:6128892</a>        | unknown                           | T/C        | 0.0466        | 0              | 1231        | missense             | ASN,SER     | benign            | 2.59         | Type 1            | 2-4 |
| 3719        | <a href="#">12:6128865</a>        | <a href="#">rs150576611</a>       | G/A        | 0.0466        | 0.0228         | 1240        | missense             | PRO,LEU     | benign            | 4.02         |                   |     |
| 3720        | <a href="#">12:6128864</a>        | <a href="#">rs141792415</a>       | C/T        | 0.035         | 0              | 1240        | synonymous           | none        | unknown           | -9.28        |                   |     |
| 3735        | <a href="#">12:6128849</a>        | <a href="#">rs148499318</a>       | C/T        | 0.1289        | 0.0457         | 1245        | synonymous           | none        | unknown           | 1.82         |                   |     |
| 3789        | <a href="#">12:6128795</a>        | unknown                           | C/T        | 0.0233        | 0              | 1263        | synonymous           | none        | unknown           | -9.88        |                   | 4   |
| <b>3795</b> | <b><a href="#">12:6128789</a></b> | <b><a href="#">rs2228319</a></b>  | <b>C/T</b> | <b>0.0465</b> | <b>11.8248</b> | <b>1265</b> | <b>synonymous</b>    | <b>none</b> | <b>unknown</b>    | <b>-5.52</b> |                   | 1;4 |
| 3797        | <a href="#">12:6128787</a>        | <a href="#">rs61749370</a>        | G/T        | 0.0116        | 0              | 1266        | missense             | PRO,GLN     | probably-damaging | 5.15         | Type 2B           | 2;4 |
| 3835        | <a href="#">12:6128749</a>        | <a href="#">rs61749376</a>        | C/T        | 0.0465        | 0              | 1279        | missense             | VAL,ILE     | possibly-damaging | 5.15         | Type 1,2A,2B,2M,3 | 2;4 |
| 3867        | <a href="#">12:6128717</a>        | unknown                           | G/A        | 0.0116        | 0              | 1289        | synonymous           | none        | unknown           | -10.3        |                   |     |
| 3868        | <a href="#">12:6128716</a>        | <a href="#">rs138900040</a>       | C/T        | 0             | 0.2951         | 1290        | missense             | GLU,LYS     | probably-damaging | 3.26         |                   |     |
| 3944        | <a href="#">12:6128640</a>        | <a href="#">rs61749396</a>        | C/T        | 0.0116        | 0              | 1315        | missense             | ARG,HIS     | probably-damaging | 4.98         | Type 1            | 4;8 |
| 3945        | <a href="#">12:6128639</a>        | <a href="#">rs143009893</a>       | G/A        | 0.0116        | 0              | 1315        | synonymous           | none        | unknown           | -9.96        |                   |     |
| 3952        | <a href="#">12:6128632</a>        | unknown                           | C/T        | 0             | 0.0227         | 1318        | missense             | VAL,MET     | probably-damaging | -1.18        |                   |     |

|             |                                   |                                    |                                                                                                                                                                                                                                                              |               |                |             |                   |                |                          |              |        |          |
|-------------|-----------------------------------|------------------------------------|--------------------------------------------------------------------------------------------------------------------------------------------------------------------------------------------------------------------------------------------------------------|---------------|----------------|-------------|-------------------|----------------|--------------------------|--------------|--------|----------|
| 3967        | <a href="#">12:6128617</a>        | unknown                            | C/T                                                                                                                                                                                                                                                          | 0.0116        | 0              | 1323        | missense          | ASP,ASN        | probably-damaging        | 4.98         |        |          |
| 3987        | <a href="#">12:6128597</a>        | <a href="#">rs138413641</a>        | G/C                                                                                                                                                                                                                                                          | 0             | 0.0227         | 1329        | missense          | ILE,MET        | benign                   | -5.44        |        |          |
| 4011        | <a href="#">12:6128573</a>        | <a href="#">rs1800381</a>          | C/T                                                                                                                                                                                                                                                          | 0             | 0.0227         | 1337        | synonymous        | none           | unknown                  | -6.83        |        | 1        |
| 4024        | <a href="#">12:6128560</a>        | <a href="#">rs61749404</a>         | G/A                                                                                                                                                                                                                                                          | 0             | 0.0908         | 1342        | missense          | ARG,CYS        | probably-damaging        | 4.98         | Type 1 | 3,8      |
| 4027        | <a href="#">12:6128557</a>        | <a href="#">rs150923481</a>        | T/C                                                                                                                                                                                                                                                          | 0.0116        | 0.0227         | 1343        | missense          | ILE,VAL        | benign                   | 1.29         |        |          |
| <b>4050</b> | <b><a href="#">12:6128534</a></b> | <b><a href="#">rs143459496</a></b> | <b>C/T</b>                                                                                                                                                                                                                                                   | <b>0</b>      | <b>0.1589</b>  | <b>1350</b> | <b>synonymous</b> | <b>none</b>    | <b>unknown</b>           | <b>-2.22</b> |        |          |
| 4092        | <a href="#">12:6128492</a>        | unknown                            | T/C                                                                                                                                                                                                                                                          | 0.0116        | 0              | 1364        | synonymous        | none           | unknown                  | -2.08        |        |          |
| 4103        | <a href="#">12:6128481</a>        | unknown                            | A/G                                                                                                                                                                                                                                                          | 0.0233        | 0              | 1368        | missense          | ILE,THR        | benign                   | 4.98         |        |          |
| <b>4130</b> | <b><a href="#">12:6128454</a></b> | <b><a href="#">rs141211612</a></b> | <b>G/A</b>                                                                                                                                                                                                                                                   | <b>0</b>      | <b>0.2724</b>  | <b>1377</b> | <b>missense</b>   | <b>ALA,VAL</b> | <b>probably-damaging</b> | <b>4.08</b>  |        | <b>4</b> |
| <b>4138</b> | <b><a href="#">12:6128446</a></b> | <b><a href="#">rs11063988</a></b>  | <b>T/C</b>                                                                                                                                                                                                                                                   | <b>0.0349</b> | <b>10.6219</b> | <b>1380</b> | <b>missense</b>   | <b>ILE,VAL</b> | <b>benign</b>            | <b>-3.75</b> |        | <b>4</b> |
| 4141        | <a href="#">12:6128443</a>        | <a href="#">rs216311</a>           | T/C                                                                                                                                                                                                                                                          | 38.0116       | 11.8021        | 1381        | missense          | THR,ALA        | benign                   | 0.2          |        | 4        |
| 4146        | <a href="#">12:6128438</a>        | <a href="#">rs140464171</a>        | C/A                                                                                                                                                                                                                                                          | 0.093         | 0              | 1382        | synonymous        | none           | unknown                  | 4.09         |        |          |
| NA          | <a href="#">12:6128418</a>        | <a href="#">rs63749068</a>         | A1/A2/A3/R<br>A1:<br>TCCTGGC<br>TGGCCAT<br>CAGGAGC<br>AGGGCGA<br>TGCGGGA<br>GGCTTCA<br>GGGCGGT<br>CGATCTT<br>GCTGCAG<br>ATTGGA<br>A2:<br>TCCTGGC<br>TGGCCAT<br>CAGGAGC<br>AGGGCGA<br>TGCGGGA<br>GGCTTCA<br>GGGCGGT<br>CGATCTT<br>GCTGAAG<br>ATTGGAA<br>CAGTG | 28.9288       | 35.1625        | NA          | codingComplex     | none           | unknown                  | 4.98         | In A1  |          |

|      |                            |                             |                                                                                                                             |        |         |      |            |         |                   |       |  |     |
|------|----------------------------|-----------------------------|-----------------------------------------------------------------------------------------------------------------------------|--------|---------|------|------------|---------|-------------------|-------|--|-----|
|      |                            |                             | A3:<br>TCCTGGC<br>TGGCCAT<br>CAGGAGC<br>AGGGCGA<br>CGCGGGA<br>GGCTTCA<br>GGGCGGT<br>CGATCTT<br>GCTGAAG<br>ATTTGGAA<br>CAGTG |        |         |      |            |         |                   |       |  |     |
|      |                            |                             | R: T                                                                                                                        |        |         |      |            |         |                   |       |  |     |
| 4173 | <a href="#">12:6128411</a> | <a href="#">rs145009516</a> | T/C                                                                                                                         | 0.035  | 0       | 1391 | synonymous | none    | unknown           | -9.83 |  | 4   |
| 4182 | <a href="#">12:6128402</a> | <a href="#">rs139215659</a> | G/A                                                                                                                         | 0      | 0.0227  | 1394 | synonymous | none    | unknown           | 0.85  |  |     |
| 4196 | <a href="#">12:6128388</a> | <a href="#">rs1800382</a>   | C/T                                                                                                                         | 1.4073 | 0.2951  | 1399 | missense   | ARG,HIS | benign            | 4.03  |  | 4   |
| 4206 | <a href="#">12:6128378</a> | unknown                     | C/T                                                                                                                         | 0      | 0.0227  | 1402 | synonymous | none    | unknown           | 1.81  |  |     |
| 4222 | <a href="#">12:6128362</a> | <a href="#">rs141990425</a> | T/G                                                                                                                         | 0      | 0.0227  | 1408 | missense   | LYS,GLN | probably-damaging | 4.92  |  |     |
| NA   | <a href="#">12:6128359</a> | <a href="#">rs61750078</a>  | A1/R                                                                                                                        | 0.0485 | 0.0469  | NA   | coding     | none    | unknown           | 4     |  |     |
|      |                            |                             | A1: C                                                                                                                       |        |         |      |            |         |                   |       |  |     |
|      |                            |                             | R: CCTT                                                                                                                     |        |         |      |            |         |                   |       |  |     |
| 4255 | <a href="#">12:6128329</a> | unknown                     | G/T                                                                                                                         | 0.0116 | 0       | 1419 | missense   | HIS,ASN | benign            | 4.92  |  |     |
| 4281 | <a href="#">12:6128303</a> | <a href="#">rs140077306</a> | G/A                                                                                                                         | 0.0116 | 0       | 1427 | synonymous | none    | unknown           | 3.71  |  |     |
| 4285 | <a href="#">12:6128299</a> | unknown                     | C/T                                                                                                                         | 0.0233 | 0       | 1429 | missense   | GLU,LYS | possibly-damaging | 4.35  |  |     |
| 4304 | <a href="#">12:6128280</a> | <a href="#">rs11063987</a>  | T/C                                                                                                                         | 0.0233 | 10.3041 | 1435 | missense   | ASN,SER | possibly-damaging | 4.35  |  | 1;4 |
| 4315 | <a href="#">12:6128269</a> | <a href="#">rs150077670</a> | C/T                                                                                                                         | 0.0116 | 0.3858  | 1439 | missense   | VAL,MET | benign            | -1.93 |  | 1   |
| 4353 | <a href="#">12:6128231</a> | unknown                     | G/A                                                                                                                         | 0.0116 | 0       | 1451 | synonymous | none    | unknown           | -5.73 |  |     |
| 4413 | <a href="#">12:6128171</a> | unknown                     | G/A                                                                                                                         | 0.0116 | 0       | 1471 | synonymous | none    | unknown           | -3.78 |  |     |
| 4414 | <a href="#">12:6128170</a> | <a href="#">rs1800383</a>   | C/G                                                                                                                         | 6.5744 | 39.3266 | 1472 | missense   | ASP,HIS | benign            | 0.81  |  | 4   |
| 4443 | <a href="#">12:6128141</a> | <a href="#">rs144796763</a> | C/A                                                                                                                         | 0.1861 | 0.0228  | 1481 | synonymous | none    | unknown           | 0.31  |  |     |
| 4457 | <a href="#">12:6128127</a> | <a href="#">rs149424724</a> | G/A                                                                                                                         | 0.0116 | 0.8178  | 1486 | missense   | SER,LEU | benign            | 3     |  | 1   |
| 4458 | <a href="#">12:6128126</a> | <a href="#">rs138966048</a> | C/T                                                                                                                         | 0      | 0.0227  | 1486 | synonymous | none    | unknown           | -9.63 |  |     |

|             |                                   |                                    |            |               |               |             |                   |                |                          |              |                |               |
|-------------|-----------------------------------|------------------------------------|------------|---------------|---------------|-------------|-------------------|----------------|--------------------------|--------------|----------------|---------------|
| 4515        | <a href="#">12:6128069</a>        | unknown                            | T/C        | 0.0116        | 0             | 1505        | synonymous        | none           | unknown                  | -8.1         |                |               |
| 4518        | <a href="#">12:6128066</a>        | <a href="#">rs146928422</a>        | C/T        | 0.0116        | 0             | 1506        | synonymous        | none           | unknown                  | -5.61        |                |               |
| 4527        | <a href="#">12:6128057</a>        | <a href="#">rs141174823</a>        | A/G        | 0             | 0.0454        | 1509        | synonymous        | none           | unknown                  | -8.15        |                |               |
| 4585        | <a href="#">12:6127999</a>        | <a href="#">rs138670575</a>        | C/G        | 0             | 0.0227        | 1529        | missense          | ASP,HIS        | benign                   | 4.84         |                |               |
| 4613        | <a href="#">12:6127971</a>        | unknown                            | G/A        | 0.0116        | 0             | 1538        | missense          | THR,MET        | possibly-damaging        | 4.11         |                |               |
| 4659        | <a href="#">12:6127925</a>        | unknown                            | G/A        | 0.0116        | 0             | 1553        | synonymous        | none           | unknown                  | -9.18        |                |               |
| <b>4665</b> | <b><a href="#">12:6127919</a></b> | <b><a href="#">rs1800384</a></b>   | <b>T/G</b> | <b>7.7791</b> | <b>2.2696</b> | <b>1555</b> | <b>synonymous</b> | <b>none</b>    | <b>unknown</b>           | <b>-9.99</b> |                | <b>4</b>      |
| 4690        | <a href="#">12:6127894</a>        | unknown                            | G/A        | 0             | 0.0227        | 1564        | missense          | ARG,TRP        | probably-damaging        | 2.97         |                |               |
| 4693        | <a href="#">12:6127891</a>        | <a href="#">rs1800385</a>          | C/A        | 8.0349        | 2.3377        | 1565        | missense          | VAL,LEU        | benign                   | 1.87         |                | <b>4</b>      |
| 4716        | <a href="#">12:6127868</a>        | unknown                            | G/A        | 0.0116        | 0             | 1572        | synonymous        | none           | unknown                  | -9.99        |                | <b>4</b>      |
| 4751        | <a href="#">12:6127833</a>        | <a href="#">rs1800386</a>          | T/C        | 0.3023        | 0.0454        | 1584        | missense          | TYR,CYS        | probably-damaging        | 5            | Type 1         | 1-4;8;19      |
| 4757        | <a href="#">12:6127827</a>        | unknown                            | G/A        | 0.0116        | 0             | 1586        | missense          | SER,PHE        | probably-damaging        | 5            |                |               |
| 4799        | <a href="#">12:6127785</a>        | unknown                            | G/A        | 0.0116        | 0             | 1600        | missense          | ALA,VAL        | benign                   | 4.05         |                |               |
| <b>4824</b> | <b><a href="#">12:6127760</a></b> | <b><a href="#">rs142635883</a></b> | <b>G/A</b> | <b>0.0116</b> | <b>0.8625</b> | <b>1608</b> | <b>synonymous</b> | <b>none</b>    | <b>unknown</b>           | <b>-9.87</b> |                | <b>1</b>      |
| 4854        | <a href="#">12:6127730</a>        | unknown                            | C/T        | 0             | 0.0227        | 1618        | synonymous        | none           | unknown                  | -1.76        |                |               |
| 4876        | <a href="#">12:6127708</a>        | unknown                            | C/A        | 0.0116        | 0             | 1626        | missense          | VAL,LEU        | benign                   | 3.13         |                |               |
| 4905        | <a href="#">12:6127679</a>        | <a href="#">rs148901164</a>        | G/A        | 0.0116        | 0.0227        | 1635        | synonymous        | none           | unknown                  | -9.08        |                |               |
| 4906        | <a href="#">12:6127678</a>        | <a href="#">rs145676400</a>        | C/T        | 0.0116        | 0.0454        | 1636        | missense          | VAL,MET        | benign                   | -0.39        |                |               |
| 4917        | <a href="#">12:6127667</a>        | <a href="#">rs146596289</a>        | C/T        | 0             | 0.2724        | 1639        | synonymous        | none           | unknown                  | 5.03         |                | <b>1</b>      |
| 4923        | <a href="#">12:6127661</a>        | <a href="#">rs140001946</a>        | C/T        | 0             | 0.3404        | 1641        | synonymous        | none           | unknown                  | -0.34        |                | <b>1</b>      |
| 4968        | <a href="#">12:6127616</a>        | <a href="#">rs143838793</a>        | C/T        | 0.0349        | 0             | 1656        | synonymous        | none           | unknown                  | -6.03        |                |               |
| <b>5014</b> | <b><a href="#">12:6127570</a></b> | <b><a href="#">rs61750598</a></b>  | <b>C/T</b> | <b>0.0116</b> | <b>0.0228</b> | <b>1672</b> | <b>missense</b>   | <b>GLY,ARG</b> | <b>possibly-damaging</b> | <b>2.25</b>  | <b>Type 2A</b> | <b>1;4;20</b> |
| 5065        | <a href="#">12:6126025</a>        | <a href="#">rs139320345</a>        | G/T        | 0.0116        | 0.0227        | 1689        | missense          | PRO,THR        | probably-damaging        | 3.4          |                |               |
| 5099        | <a href="#">12:6125991</a>        | unknown                            | G/A        | 0.0116        | 0             | 1700        | missense          | SER,PHE        | probably-damaging        | 4.31         |                |               |
| 5129        | <a href="#">12:6125961</a>        | unknown                            | A/G        | 0             | 0.0227        | 1710        | missense          | MET,THR        | probably-damaging        | 4.31         |                |               |
| 5139        | <a href="#">12:6125951</a>        | <a href="#">rs150873446</a>        | G/A        | 0             | 0.227         | 1713        | synonymous        | none           | unknown                  | -5.55        |                |               |

|             |                                   |                                    |            |               |               |             |                               |                |                          |              |                  |     |
|-------------|-----------------------------------|------------------------------------|------------|---------------|---------------|-------------|-------------------------------|----------------|--------------------------|--------------|------------------|-----|
| 5165        | <a href="#">12:6125925</a>        | unknown                            | T/C        | 0.0116        | 0             | 1722        | missense                      | ASN,SER        | benign                   | 3.15         |                  |     |
| <b>5173</b> | <b><a href="#">12:6125820</a></b> | <b><a href="#">rs78302129</a></b>  | <b>G/A</b> | <b>0</b>      | <b>2.3377</b> | <b>1725</b> | <b>missense</b>               | <b>PRO,SER</b> | <b>probably-damaging</b> | <b>3.39</b>  |                  | 1:3 |
| 5177        | <a href="#">12:6125816</a>        | <a href="#">rs147313320</a>        | C/T        | 0             | 0.1135        | 1726        | missense                      | ARG,HIS        | benign                   | -0.89        |                  |     |
| 5191        | <a href="#">12:6125802</a>        | <a href="#">rs61750603</a>         | A/T        | 0.1977        | 0             | 1731        | missense                      | SER,THR        | probably-damaging        | 1.84         | unclassified VWD | 1:4 |
| 5200        | <a href="#">12:6125793</a>        | unknown                            | G/A        | 0.0116        | 0             | 1734        | stop-gained                   | GLN,stop       | unknown                  | 4.31         |                  |     |
| 5219        | <a href="#">12:6125774</a>        | unknown                            | G/A        | 0             | 0.0227        | 1740        | missense                      | THR,ILE        | probably-damaging        | 3.4          |                  |     |
| 5269        | <a href="#">12:6125724</a>        | unknown                            | G/A        | 0             | 0.0454        | 1757        | missense                      | LEU,PHE        | possibly-damaging        | 2.24         |                  |     |
| <b>5277</b> | <b><a href="#">12:6125716</a></b> | <b><a href="#">rs41276736</a></b>  | <b>G/A</b> | <b>1.2558</b> | <b>0.2043</b> | <b>1759</b> | <b>synonymous</b>             | <b>none</b>    | <b>unknown</b>           | <b>-0.15</b> |                  | 1:4 |
| 5278        | <a href="#">12:6125715</a>        | <a href="#">rs61750604</a>         | C/T        | 0.1628        | 0             | 1760        | missense                      | VAL,ILE        | benign                   | -0.01        | Type 1           | 1:2 |
| 5288        | <a href="#">12:6125705</a>        | unknown                            | C/T        | 0.0116        | 0             | 1763        | missense                      | ARG,GLN        | benign                   | -6.71        |                  |     |
| 5311        | <a href="#">12:6125682</a>        | unknown                            | C/T        | 0             | 0.0227        | 1771        | missense-near-splice          | GLY,ARG        | probably-damaging        | 4.34         |                  |     |
| <b>5313</b> | <b><a href="#">12:6125397</a></b> | <b><a href="#">rs2229448</a></b>   | <b>C/A</b> | <b>0.093</b>  | <b>3.1775</b> | <b>1771</b> | <b>synonymous-near-splice</b> | <b>none</b>    | <b>unknown</b>           | <b>3.68</b>  |                  | 1:4 |
| 5338        | <a href="#">12:6125372</a>        | unknown                            | A/C        | 0             | 0.0227        | 1780        | missense                      | TYR,ASP        | probably-damaging        | 4.58         |                  |     |
| 5354        | <a href="#">12:6125356</a>        | <a href="#">rs150349730</a>        | A/G        | 0             | 0.0227        | 1785        | missense                      | MET,THR        | benign                   | 2.15         |                  |     |
| 5370        | <a href="#">12:6125340</a>        | <a href="#">rs71582868</a>         | C/T        | 0.0116        | 0             | 1790        | synonymous                    | none           | unknown                  | -6.88        |                  | 1   |
| 5384        | <a href="#">12:6125326</a>        | <a href="#">rs146729537</a>        | G/A        | 0             | 0.227         | 1795        | missense                      | ALA,VAL        | benign                   | -3.44        |                  | 1:3 |
| 5403        | <a href="#">12:6125307</a>        | unknown                            | C/T        | 0.0116        | 0             | 1801        | synonymous                    | none           | unknown                  | -3.44        |                  |     |
| 5463        | <a href="#">12:6122804</a>        | unknown                            | T/C        | 0             | 0.0227        | 1821        | synonymous                    | none           | unknown                  | -5.09        |                  |     |
| 5473        | <a href="#">12:6122794</a>        | unknown                            | T/C        | 0             | 0.0227        | 1825        | missense                      | ILE,VAL        | benign                   | 1.5          |                  |     |
| 5486        | <a href="#">12:6122781</a>        | <a href="#">rs143445274</a>        | T/C        | 0             | 0.0227        | 1829        | missense                      | ASP,GLY        | probably-damaging        | 5.21         |                  |     |
| 5489        | <a href="#">12:6122778</a>        | unknown                            | C/T        | 0             | 0.0227        | 1830        | missense                      | ARG,HIS        | probably-damaging        | 0.78         |                  |     |
| <b>5515</b> | <b><a href="#">12:6122752</a></b> | <b><a href="#">rs141134620</a></b> | <b>A/G</b> | <b>0</b>      | <b>2.2696</b> | <b>1839</b> | <b>synonymous</b>             | <b>none</b>    | <b>unknown</b>           | <b>2.89</b>  |                  |     |
| 5518        | <a href="#">12:6122749</a>        | unknown                            | C/A        | 0.0233        | 0             | 1840        | missense                      | ALA,SER        | probably-damaging        | 5.21         |                  |     |
| 5541        | <a href="#">12:6122726</a>        | <a href="#">rs146540001</a>        | G/A        | 0.0116        | 0             | 1847        | synonymous                    | none           | unknown                  | -4.29        |                  |     |
| 5597        | <a href="#">12:6122670</a>        | unknown                            | G/A        | 0             | 0.0227        | 1866        | missense                      | SER,PHE        | probably-damaging        | 4.28         |                  |     |



|             |                                   |                                   |            |                |                |             |                               |             |                   |              |                                      |         |
|-------------|-----------------------------------|-----------------------------------|------------|----------------|----------------|-------------|-------------------------------|-------------|-------------------|--------------|--------------------------------------|---------|
| 5631        | <a href="#">12:6121286</a>        | <a href="#">rs144221902</a>       | C/T        | 0.0116         | 0              | 1877        | synonymous                    | none        | unknown           | -5.42        |                                      |         |
| <b>5667</b> | <b><a href="#">12:6120958</a></b> | <b><a href="#">rs56981471</a></b> | <b>G/A</b> | <b>0.0589</b>  | <b>6.023</b>   | <b>1889</b> | <b>synonymous</b>             | <b>none</b> | <b>unknown</b>    | <b>-0.99</b> |                                      | 1:4     |
| 5673        | <a href="#">12:6120952</a>        | unknown                           | G/A        | 0.0117         | 0              | 1891        | synonymous                    | none        | unknown           | -4.08        |                                      |         |
| 5704        | <a href="#">12:6120921</a>        | <a href="#">rs144757652</a>       | C/T        | 0              | 0.0228         | 1902        | missense                      | VAL,MET     | possibly-damaging | 4.66         |                                      |         |
| 5777        | <a href="#">12:6120848</a>        | unknown                           | G/A        | 0              | 0.0227         | 1926        | missense                      | SER,LEU     | benign            | 4.14         |                                      |         |
| 5785        | <a href="#">12:6120840</a>        | <a href="#">rs149799233</a>       | T/A        | 0.0116         | 0              | 1929        | missense                      | ASN,TYR     | possibly-damaging | 3.89         |                                      |         |
| 5797        | <a href="#">12:6120828</a>        | unknown                           | G/A        | 0              | 0.0227         | 1933        | missense                      | PRO,SER     | probably-damaging | 3.13         |                                      |         |
| 5801        | <a href="#">12:6120824</a>        | <a href="#">rs139845585</a>       | A/C        | 0.0117         | 0              | 1934        | missense                      | VAL,GLY     | benign            | 5.03         |                                      |         |
| <b>5844</b> | <b><a href="#">12:6105387</a></b> | <b><a href="#">rs216902</a></b>   | <b>G/A</b> | <b>37.9767</b> | <b>30.9805</b> | <b>1948</b> | <b>synonymous-near-splice</b> | <b>none</b> | <b>unknown</b>    | <b>0.48</b>  |                                      | 1:4     |
| 5845        | <a href="#">12:6105386</a>        | unknown                           | C/T        | 0.0116         | 0              | 1949        | missense                      | VAL,MET     | benign            | -0.04        |                                      |         |
| 5851        | <a href="#">12:6105380</a>        | <a href="#">rs144072210</a>       | T/C        | 0.093          | 0.0227         | 1951        | missense                      | THR,ALA     | possibly-damaging | 5.55         |                                      |         |
| 5909        | <a href="#">12:6105322</a>        | unknown                           | C/T        | 0.0116         | 0              | 1970        | missense                      | GLY,ASP     | probably-damaging | 5.55         |                                      |         |
| 6000        | <a href="#">12:6105231</a>        | unknown                           | G/A        | 0.0116         | 0              | 2000        | synonymous                    | none        | unknown           | 3.66         |                                      |         |
| 6016        | <a href="#">12:6105215</a>        | <a href="#">rs140229844</a>       | C/T        | 0              | 0.0227         | 2006        | missense                      | GLU,LYS     | probably-damaging | 4.6          |                                      |         |
| 6052        | <a href="#">12:6105179</a>        | unknown                           | T/C        | 0              | 0.0227         | 2018        | missense                      | SER,GLY     | possibly-damaging | 2.97         |                                      | 1       |
| 6069        | <a href="#">12:6103768</a>        | unknown                           | C/T        | 0              | 0.0454         | 2023        | synonymous                    | none        | unknown           | -9.82        |                                      |         |
| 6087        | <a href="#">12:6103750</a>        | unknown                           | G/C        | 0              | 0.0454         | 2029        | synonymous                    | none        | unknown           | 0.3          |                                      |         |
| 6099        | <a href="#">12:6103738</a>        | <a href="#">rs55784921</a>        | G/A        | 0.186          | 0.0227         | 2033        | synonymous                    | none        | unknown           | -1.54        |                                      | 1:4     |
| 6187        | <a href="#">12:6103650</a>        | <a href="#">rs61750615</a>        | G/A        | 1.0698         | 0.2497         | 2063        | missense                      | PRO,SER     | probably-damaging | 4.91         | Type 1,3 (or no known pathogenicity) | 1-4;8;9 |
| 6219        | <a href="#">12:6103618</a>        | <a href="#">rs147982896</a>       | G/A        | 0.0116         | 0.0227         | 2073        | synonymous                    | none        | unknown           | 3.04         |                                      |         |
| 6242        | <a href="#">12:6103595</a>        | unknown                           | G/A        | 0.0116         | 0              | 2081        | missense                      | THR,MET     | benign            | -5.64        |                                      |         |
| 6250        | <a href="#">12:6103587</a>        | unknown                           | G/C        | 0.0116         | 0              | 2084        | missense                      | LEU,VAL     | possibly-damaging | 5.15         |                                      | 1       |
| 6277        | <a href="#">12:6103349</a>        | <a href="#">rs149274687</a>       | C/G        | 0.0116         | 0              | 2093        | missense                      | ALA,PRO     | probably-damaging | 3.11         |                                      |         |
| 6302        | <a href="#">12:6103324</a>        | unknown                           | C/T        | 0.0116         | 0              | 2101        | missense                      | GLY,ASP     | probably-damaging | 5.17         |                                      |         |

|             |                                   |                                   |            |                |                |             |                   |                |                          |              |               |                |
|-------------|-----------------------------------|-----------------------------------|------------|----------------|----------------|-------------|-------------------|----------------|--------------------------|--------------|---------------|----------------|
| 6303        | <a href="#">12:6103323</a>        | <a href="#">rs115914543</a>       | G/T        | 0.0349         | 0.3631         | 2101        | synonymous        | none           | unknown                  | 1.16         |               | 1              |
| 6320        | <a href="#">12:6103306</a>        | unknown                           | C/A        | 0              | 0.0227         | 2107        | missense          | TRP,LEU        | benign                   | 0.44         |               |                |
| 6339        | <a href="#">12:6103287</a>        | unknown                           | T/C        | 0.0116         | 0              | 2113        | synonymous        | none           | unknown                  | -10.3        |               |                |
| <b>6345</b> | <b><a href="#">12:6103281</a></b> | <b><a href="#">rs11537642</a></b> | <b>A/T</b> | <b>0.0465</b>  | <b>14.9796</b> | <b>2115</b> | <b>synonymous</b> | <b>none</b>    | <b>unknown</b>           | <b>-10.3</b> |               | <b>1</b>       |
| 6352        | <a href="#">12:6103274</a>        | unknown                           | G/A        | 0.0116         | 0              | 2118        | missense          | ARG,TRP        | benign                   | 3.22         |               |                |
| 6353        | <a href="#">12:6103273</a>        | unknown                           | C/T        | 0              | 0.0454         | 2118        | missense          | ARG,GLN        | benign                   | 3.94         |               |                |
| 6366        | <a href="#">12:6103260</a>        | <a href="#">rs141097321</a>       | C/T        | 0              | 0.0227         | 2122        | synonymous        | none           | unknown                  | -10.3        |               |                |
| 6375        | <a href="#">12:6103251</a>        | unknown                           | G/C        | 0.0116         | 0              | 2125        | synonymous        | none           | unknown                  | -2.46        |               |                |
| 6377        | <a href="#">12:6103249</a>        | <a href="#">rs71579338</a>        | A/G        | 0.0116         | 0              | 2126        | missense          | ILE,THR        | benign                   | 2.8          |               | 4              |
| 6405        | <a href="#">12:6103221</a>        | <a href="#">rs146529302</a>       | G/C        | 0              | 0.0227         | 2135        | missense          | ASP,GLU        | benign                   | 2.33         |               |                |
| 6433        | <a href="#">12:6103193</a>        | <a href="#">rs61750618</a>        | G/A        | 0              | 0.0227         | 2145        | missense          | PRO,SER        | benign                   | 0            | Type 1        | 4;8            |
| 6463        | <a href="#">12:6103163</a>        | unknown                           | C/T        | 0              | 0.0227         | 2155        | missense          | ALA,THR        | possibly-damaging        | 4.39         |               |                |
| <b>6532</b> | <b><a href="#">12:6103094</a></b> | <b><a href="#">rs34230288</a></b> | <b>C/A</b> | <b>2.2558</b>  | <b>0.3631</b>  | <b>2178</b> | <b>missense</b>   | <b>ALA,SER</b> | <b>benign</b>            | <b>-0.72</b> |               | <b>1;4</b>     |
| <b>6554</b> | <b><a href="#">12:6103072</a></b> | <b><a href="#">rs76342212</a></b> | <b>C/T</b> | <b>0.1512</b>  | <b>19.9047</b> | <b>2185</b> | <b>missense</b>   | <b>ARG,GLN</b> | <b>probably-damaging</b> | <b>5.3</b>   | <b>Type 1</b> | <b>1-4</b>     |
| 6561        | <a href="#">12:6103065</a>        | <a href="#">rs151250563</a>       | G/A        | 0.0116         | 0              | 2187        | synonymous        | none           | unknown                  | -7.41        |               |                |
| 6570        | <a href="#">12:6103056</a>        | unknown                           | G/A        | 0.0116         | 0              | 2190        | synonymous        | none           | unknown                  | 1.54         |               |                |
| 6674        | <a href="#">12:6101109</a>        | <a href="#">rs142316574</a>       | C/T        | 0.0116         | 0              | 2225        | missense          | SER,ASN        | possibly-damaging        | 3.75         |               |                |
| 6677        | <a href="#">12:6101106</a>        | unknown                           | G/T        | 0.0116         | 0.0227         | 2226        | missense          | SER,TYR        | benign                   | 3.76         |               | 1              |
| 6756        | <a href="#">12:6101027</a>        | <a href="#">rs71581020</a>        | C/T        | 0.1628         | 0.0454         | 2252        | synonymous        | none           | unknown                  | 3.49         |               |                |
| 6784        | <a href="#">12:6100999</a>        | <a href="#">rs147715696</a>       | C/T        | 0              | 0.0227         | 2262        | missense          | GLY,ARG        | probably-damaging        | 5.66         |               |                |
| <b>6846</b> | <b><a href="#">12:6094784</a></b> | <b><a href="#">rs10849371</a></b> | <b>T/C</b> | <b>14.8023</b> | <b>19.2919</b> | <b>2282</b> | <b>synonymous</b> | <b>none</b>    | <b>unknown</b>           | <b>1.04</b>  |               | <b>1;4</b>     |
| <b>6859</b> | <b><a href="#">12:6094771</a></b> | <b><a href="#">rs61750625</a></b> | <b>G/A</b> | <b>0</b>       | <b>0.6128</b>  | <b>2287</b> | <b>missense</b>   | <b>ARG,TRP</b> | <b>probably-damaging</b> | <b>1.58</b>  | <b>Type 1</b> | <b>1;4;8;9</b> |
| 6894        | <a href="#">12:6094736</a>        | <a href="#">rs147523582</a>       | C/T        | 0              | 0.0227         | 2298        | synonymous        | none           | unknown                  | -9.6         |               |                |
| 6908        | <a href="#">12:6094279</a>        | <a href="#">rs149432685</a>       | G/A        | 0.0116         | 0              | 2303        | missense          | THR,MET        | benign                   | 4.44         |               |                |
| 6909        | <a href="#">12:6094278</a>        | unknown                           | C/T        | 0.0116         | 0              | 2303        | synonymous        | none           | unknown                  | -10.7        |               |                |
| 6916        | <a href="#">12:6094271</a>        | <a href="#">rs138997660</a>       | G/A        | 0              | 0.0454         | 2306        | synonymous        | none           | unknown                  | 4.42         |               |                |
| 6931        | <a href="#">12:6094256</a>        | <a href="#">rs150725355</a>       | G/A        | 0.0349         | 0              | 2311        | missense          | ARG,CYS        | probably-damaging        | 5.33         | Type 1        | 4              |

|             |                            |                             |     |         |        |      |                        |         |                   |       |        |         |
|-------------|----------------------------|-----------------------------|-----|---------|--------|------|------------------------|---------|-------------------|-------|--------|---------|
| 6937        | <a href="#">12:6094250</a> | unknown                     | G/T | 0.0116  | 0      | 2313 | missense               | ARG,SER | possibly-damaging | 4.41  |        |         |
| <b>6938</b> | <a href="#">12:6094249</a> | <a href="#">rs62641242</a>  | C/T | 0.0116  | 0.0681 | 2313 | missense               | ARG,HIS | possibly-damaging | -2.61 | Type 1 | 1:3,4:8 |
| 6949        | <a href="#">12:6094238</a> | <a href="#">rs138618444</a> | C/T | 0       | 0.0227 | 2317 | missense               | ASP,ASN | benign            | 0.1   |        |         |
| 6965        | <a href="#">12:6094222</a> | unknown                     | T/A | 0.0233  | 0      | 2322 | missense               | GLU,VAL | probably-damaging | 5.33  |        |         |
| 6978        | <a href="#">12:6092419</a> | unknown                     | C/T | 0.0116  | 0      | 2326 | synonymous-near-splice | none    | unknown           | 2.87  |        |         |
| 7007        | <a href="#">12:6092390</a> | <a href="#">rs144769404</a> | G/A | 0.0349  | 0      | 2336 | missense               | PRO,LEU | benign            | -1.38 |        |         |
| 7024        | <a href="#">12:6092373</a> | <a href="#">rs142612858</a> | G/A | 0.0116  | 0      | 2342 | missense               | ARG,CYS | benign            | 3.97  |        |         |
| 7025        | <a href="#">12:6092372</a> | <a href="#">rs34120165</a>  | C/T | 0.0116  | 0.0227 | 2342 | missense               | ARG,HIS | benign            | -1.86 |        |         |
| <b>7059</b> | <a href="#">12:6092338</a> | <a href="#">rs112319661</a> | C/G | 0       | 0.5901 | 2353 | missense               | GLU,ASP | possibly-damaging | 0.47  |        | 1       |
| <b>7080</b> | <a href="#">12:6092317</a> | <a href="#">rs111597150</a> | G/A | 0       | 0.1816 | 2360 | synonymous-near-splice | none    | unknown           | -9.71 |        | 1       |
| 7117        | <a href="#">12:6091122</a> | <a href="#">rs148908677</a> | G/A | 0.0116  | 0      | 2373 | missense               | PRO,SER | probably-damaging | 4.83  |        |         |
| 7130        | <a href="#">12:6091109</a> | unknown                     | G/A | 0.0116  | 0.0227 | 2377 | missense               | PRO,LEU | probably-damaging | 3.92  |        |         |
| <b>7150</b> | <a href="#">12:6091089</a> | <a href="#">rs145697622</a> | G/A | 0       | 0.2724 | 2384 | missense               | ARG,TRP | probably-damaging | 4.1   |        | 1:3     |
| 7151        | <a href="#">12:6091088</a> | <a href="#">rs150201871</a> | C/T | 0       | 0.0454 | 2384 | missense               | ARG,GLN | probably-damaging | 2.19  |        |         |
| 7173        | <a href="#">12:6091066</a> | unknown                     | C/T | 0       | 0.0227 | 2391 | synonymous             | none    | unknown           | 2.55  |        |         |
| 7191        | <a href="#">12:6091048</a> | <a href="#">rs142422347</a> | G/A | 0       | 0.0454 | 2397 | synonymous             | none    | unknown           | 4.62  |        |         |
| 7207        | <a href="#">12:6091032</a> | <a href="#">rs147705313</a> | C/T | 0       | 0.0227 | 2403 | missense               | VAL,MET | possibly-damaging | 3.56  |        |         |
| 7236        | <a href="#">12:6091003</a> | <a href="#">rs145450160</a> | T/G | 0       | 0.1816 | 2412 | synonymous             | none    | unknown           | -11   |        |         |
| <b>7239</b> | <a href="#">12:6091000</a> | <a href="#">rs216867</a>    | A/G | 10.5465 | 25.488 | 2413 | synonymous             | none    | unknown           | -7.54 |        | 1:4     |
| 7281        | <a href="#">12:6090958</a> | <a href="#">rs151303589</a> | G/A | 0.0116  | 0      | 2427 | synonymous             | none    | unknown           | -5.03 |        |         |
| 7301        | <a href="#">12:6085413</a> | unknown                     | C/T | 0       | 0.0227 | 2434 | missense               | ARG,GLN | probably-damaging | -0.52 |        |         |
| 7329        | <a href="#">12:6085385</a> | <a href="#">rs142444263</a> | G/A | 0       | 0.0227 | 2443 | synonymous             | none    | unknown           | 5.38  |        |         |
| <b>7344</b> | <a href="#">12:6085370</a> | <a href="#">rs55944252</a>  | G/A | 0.0814  | 0      | 2448 | synonymous             | none    | unknown           | -7.4  |        | 1:4     |
| 7362        | <a href="#">12:6085352</a> | <a href="#">rs146504585</a> | G/A | 0.0116  | 0      | 2454 | synonymous             | none    | unknown           | -10.4 |        | 1       |

|             |                          |                           |            |               |               |             |                    |                 |                          |              |               |            |
|-------------|--------------------------|---------------------------|------------|---------------|---------------|-------------|--------------------|-----------------|--------------------------|--------------|---------------|------------|
| <b>7377</b> | <b><u>12:6085337</u></b> | <b><u>rs142452106</u></b> | <b>G/A</b> | <b>0</b>      | <b>0.227</b>  | <b>2459</b> | <b>synonymous</b>  | <b>none</b>     | <b>unknown</b>           | <b>-10.4</b> |               | <b>1</b>   |
| 7378        | <u>12:6085336</u>        | <u>rs149677556</u>        | C/T        | 0             | 0.0227        | 2460        | missense           | VAL,MET         | probably-damaging        | 5.19         |               |            |
| 7391        | <u>12:6085323</u>        | unknown                   | C/A        | 0.0116        | 0             | 2464        | missense           | ARG,LEU         | possibly-damaging        | 3            |               |            |
| 7392        | <u>12:6085322</u>        | <u>rs149984396</u>        | G/A        | 0.0349        | 0             | 2464        | synonymous         | none            | unknown                  | -10.4        |               | 1          |
| 7393        | <u>12:6085321</u>        | unknown                   | C/T        | 0             | 0.0227        | 2465        | missense           | VAL,MET         | probably-damaging        | 5.19         |               |            |
| 7433        | <u>12:6085281</u>        | <u>rs111752224</u>        | C/T        | 0.0233        | 0             | 2478        | missense           | ARG,GLN         | benign                   | -6.3         |               | 1          |
| NA          | <u>12:6085276</u>        | <u>rs61751290</u>         | C/A        | 0.0116        | 0             | NA          | splice-5           | none            | unknown                  | 5.19         |               |            |
| 7449        | <u>12:6080864</u>        | unknown                   | G/A        | 0.0116        | 0             | 2483        | synonymous         | none            | unknown                  | -8.39        |               |            |
| 7450        | <u>12:6080863</u>        | <u>rs139864572</u>        | C/T        | 0.0116        | 0             | 2484        | missense           | VAL,ILE         | possibly-damaging        | 4.79         |               |            |
| 7518        | <u>12:6080795</u>        | unknown                   | C/T        | 0.0116        | 0.0227        | 2506        | synonymous         | none            | unknown                  | -9.58        |               |            |
| 7551        | <u>12:6078555</u>        | <u>rs145955543</u>        | G/A        | 0.0233        | 0             | 2517        | synonymous         | none            | unknown                  | -7.48        |               |            |
| 7571        | <u>12:6078535</u>        | unknown                   | G/A        | 0             | 0.0227        | 2524        | missense           | PRO,LEU         | benign                   | 0.74         |               |            |
| 7590        | <u>12:6078516</u>        | unknown                   | G/C        | 0             | 0.0227        | 2530        | missense           | ILE,MET         | benign                   | 4.87         |               |            |
| <b>7603</b> | <b><u>12:6078503</u></b> | <b><u>rs61751296</u></b>  | <b>G/A</b> | <b>0.0116</b> | <b>0</b>      | <b>2535</b> | <b>stop-gained</b> | <b>ARG,stop</b> | <b>unknown</b>           | <b>3.96</b>  | <b>Type 3</b> | <b>4</b>   |
| 7604        | <u>12:6078502</u>        | <u>rs137987906</u>        | C/T        | 0.0116        | 0.0227        | 2535        | missense           | ARG,GLN         | probably-damaging        | 3.98         |               |            |
| 7619        | <u>12:6078487</u>        | <u>rs150778949</u>        | A/G        | 0             | 0.1135        | 2540        | missense           | VAL,ALA         | possibly-damaging        | 4.87         |               |            |
| 7649        | <u>12:6078457</u>        | unknown                   | G/A        | 0             | 0.0227        | 2550        | missense           | PRO,LEU         | probably-damaging        | 3.95         |               |            |
| 7666        | <u>12:6078440</u>        | unknown                   | C/T        | 0.0116        | 0             | 2556        | missense           | VAL,ILE         | benign                   | -1.9         |               |            |
| 7673        | <u>12:6078433</u>        | unknown                   | G/A        | 0             | 0.0227        | 2558        | missense           | PRO,LEU         | probably-damaging        | 4.87         |               | 1          |
| <b>7682</b> | <b><u>12:6078424</u></b> | <b><u>rs35335161</u></b>  | <b>A/T</b> | <b>4.593</b>  | <b>2.3377</b> | <b>2561</b> | <b>missense</b>    | <b>PHE,TYR</b>  | <b>possibly-damaging</b> | <b>4.87</b>  |               | <b>1;4</b> |
| <b>7698</b> | <b><u>12:6078408</u></b> | <b><u>rs16932285</u></b>  | <b>C/T</b> | <b>0.0116</b> | <b>2.6555</b> | <b>2566</b> | <b>synonymous</b>  | <b>none</b>     | <b>unknown</b>           | <b>4.87</b>  |               | <b>1;4</b> |
| 7707        | <u>12:6078399</u>        | <u>rs143235468</u>        | C/T        | 0.0116        | 0.0454        | 2569        | synonymous         | none            | unknown                  | -0.41        |               |            |
| 7714        | <u>12:6078392</u>        | unknown                   | G/A        | 0             | 0.0227        | 2572        | missense           | PRO,SER         | probably-damaging        | 4.87         |               |            |
| 7723        | <u>12:6078383</u>        | unknown                   | G/A        | 0.0116        | 0             | 2575        | missense           | ARG,CYS         | probably-damaging        | 4.77         |               |            |
| 7724        | <u>12:6078382</u>        | unknown                   | C/T        | 0.0116        | 0             | 2575        | missense           | ARG,HIS         | benign                   | -3.87        |               |            |

|             |                            |                             |            |               |               |             |                        |                |                          |             |                      |        |
|-------------|----------------------------|-----------------------------|------------|---------------|---------------|-------------|------------------------|----------------|--------------------------|-------------|----------------------|--------|
| 7728        | <a href="#">12:6078378</a> | unknown                     | A/G        | 0.0116        | 0             | 2576        | synonymous-near-splice | none           | unknown                  | -4.04       |                      |        |
| 7732        | <a href="#">12:6077331</a> | unknown                     | G/A        | 0.0116        | 0             | 2578        | missense               | ARG,CYS        | benign                   | 4.73        |                      |        |
| 7747        | <a href="#">12:6077316</a> | unknown                     | T/G        | 0             | 0.0227        | 2583        | missense               | MET,LEU        | benign                   | -9.47       |                      |        |
| 7761        | <a href="#">12:6077302</a> | unknown                     | A/G        | 0.0116        | 0             | 2587        | synonymous             | none           | unknown                  | 1.89        |                      |        |
| 7766        | <a href="#">12:6077297</a> | unknown                     | A/G        | 0.0116        | 0             | 2589        | missense               | ILE,THR        | probably-damaging        | 4.73        |                      |        |
| 7773        | <a href="#">12:6076766</a> | unknown                     | G/A        | 0             | 0.0227        | 2591        | synonymous             | none           | unknown                  | -9.72       |                      |        |
| 7774        | <a href="#">12:6076765</a> | <a href="#">rs142316324</a> | C/T        | 0.0116        | 0.1135        | 2592        | missense               | GLY,ARG        | probably-damaging        | 4.86        |                      |        |
| 7802        | <a href="#">12:6076737</a> | <a href="#">rs138303680</a> | G/A        | 0             | 0.0227        | 2601        | missense               | THR,MET        | benign                   | 3.23        |                      |        |
| 7811        | <a href="#">12:6076728</a> | <a href="#">rs147052620</a> | C/T        | 0             | 0.0227        | 2604        | missense               | ARG,HIS        | benign                   | -10.1       |                      |        |
| 7849        | <a href="#">12:6076690</a> | unknown                     | G/A        | 0.0116        | 0             | 2617        | synonymous             | none           | unknown                  | 4.07        |                      |        |
| 7876        | <a href="#">12:6076663</a> | <a href="#">rs141666705</a> | G/T        | 0             | 0.0454        | 2626        | missense               | PRO,THR        | benign                   | 0.75        |                      |        |
| 7940        | <a href="#">12:6062708</a> | <a href="#">rs61751302</a>  | G/A        | 0.1977        | 0.0908        | 2647        | missense               | THR,MET        | benign                   | -3.81       | Type 1               | 1-4:21 |
| 7987        | <a href="#">12:6061685</a> | unknown                     | G/A        | 0.0116        | 0             | 2663        | missense-near-splice   | ARG,CYS        | probably-damaging        | 4.42        |                      |        |
| 7988        | <a href="#">12:6061684</a> | <a href="#">rs149834874</a> | C/G        | 0.1977        | 0             | 2663        | missense-near-splice   | ARG,PRO        | possibly-damaging        | 2.2         | Type 1 (with C1130F) | 8      |
| <b>7997</b> | <a href="#">12:6061675</a> | <a href="#">rs78353028</a>  | <b>G/A</b> | <b>0.0465</b> | <b>6.8543</b> | <b>2666</b> | <b>missense</b>        | <b>THR,MET</b> | <b>benign</b>            | <b>0.38</b> |                      | 1;3    |
| 8035        | <a href="#">12:6061637</a> | unknown                     | T/C        | 0             | 0.0454        | 2679        | missense               | ASN,ASP        | benign                   | 5.45        |                      |        |
| 8036        | <a href="#">12:6061636</a> | <a href="#">rs151129435</a> | T/C        | 0.0116        | 0.2497        | 2679        | missense               | ASN,SER        | benign                   | 1.45        |                      |        |
| 8048        | <a href="#">12:6061624</a> | <a href="#">rs144511926</a> | T/C        | 0.0116        | 0             | 2683        | missense               | GLU,GLY        | possibly-damaging        | 5.45        |                      |        |
| 8079        | <a href="#">12:6061593</a> | <a href="#">rs41276732</a>  | G/A        | 0.2791        | 0.0454        | 2693        | synonymous             | none           | unknown                  | 1.54        |                      | 1      |
| 8084        | <a href="#">12:6061588</a> | <a href="#">rs76459136</a>  | G/C        | 0.093         | 0             | 2695        | missense               | PRO,ARG        | probably-damaging        | 5.45        |                      | 3      |
| 8094        | <a href="#">12:6061578</a> | <a href="#">rs144030544</a> | T/C        | 0.0698        | 0             | 2698        | synonymous             | none           | unknown                  | -5.65       |                      |        |
| <b>8113</b> | <a href="#">12:6061559</a> | <a href="#">rs7962217</a>   | <b>C/T</b> | <b>5.7791</b> | <b>1.9746</b> | <b>2705</b> | <b>missense</b>        | <b>GLY,ARG</b> | <b>probably-damaging</b> | <b>5.45</b> |                      | 1;4    |
| 8160        | <a href="#">12:6059045</a> | unknown                     | C/T        | 0.0116        | 0             | 2720        | synonymous             | none           | unknown                  | 4.71        |                      | 4      |
| 8187        | <a href="#">12:6059018</a> | unknown                     | G/C        | 0.0116        | 0             | 2729        | synonymous             | none           | unknown                  | 3.58        |                      |        |
| 8273        | <a href="#">12:6058350</a> | <a href="#">rs144542595</a> | G/A        | 0             | 0.0681        | 2758        | missense               | ALA,VAL        | possibly-damaging        | 4.89        |                      |        |

|             |                          |                           |            |          |               |             |                   |                |                   |              |  |            |
|-------------|--------------------------|---------------------------|------------|----------|---------------|-------------|-------------------|----------------|-------------------|--------------|--|------------|
| <b>8289</b> | <b><u>12:6058334</u></b> | <b><u>rs149309674</u></b> | <b>G/A</b> | <b>0</b> | <b>0.4993</b> | <b>2763</b> | <b>synonymous</b> | <b>none</b>    | <b>unknown</b>    | <b>-1.18</b> |  | <b>4</b>   |
| 8324        | <u>12:6058299</u>        | unknown                   | G/A        | 0.0116   | 0             | 2775        | missense          | SER,PHE        | benign            | 3.04         |  |            |
| 8325        | <u>12:6058298</u>        | <u>rs138588762</u>        | A/G        | 0.0233   | 0             | 2775        | synonymous        | none           | unknown           | -5.98        |  |            |
| 8332        | <u>12:6058291</u>        | unknown                   | G/A        | 0.0116   | 0             | 2778        | missense          | ARG,TRP        | probably-damaging | 1.58         |  |            |
| 8333        | <u>12:6058290</u>        | <u>rs150577615</u>        | C/T        | 0.0233   | 0             | 2778        | missense          | ARG,GLN        | benign            | -2.49        |  |            |
| 8336        | <u>12:6058287</u>        | unknown                   | G/A        | 0.0116   | 0             | 2779        | missense          | THR,MET        | probably-damaging | 1.4          |  |            |
| 8337        | <u>12:6058286</u>        | unknown                   | C/T        | 0.0116   | 0             | 2779        | synonymous        | none           | unknown           | -6.15        |  | 1          |
| 8366        | <u>12:6058257</u>        | unknown                   | G/C        | 0.0116   | 0             | 2789        | missense          | THR,SER        | benign            | 5.01         |  |            |
| <b>8378</b> | <b><u>12:6058245</u></b> | <b><u>rs143743709</u></b> | <b>A/G</b> | <b>0</b> | <b>0.6128</b> | <b>2793</b> | <b>missense</b>   | <b>VAL,ALA</b> | <b>benign</b>     | <b>5.01</b>  |  | <b>1;3</b> |
| 8391        | <u>12:6058232</u>        | unknown                   | C/T        | 0        | 0.0227        | 2797        | synonymous        | none           | unknown           | 0.7          |  |            |
| 8439        | <u>12:6058184</u>        | <u>rs138263930</u>        | C/T        | 0        | 0.0227        | 2813        | synonymous        | none           | unknown           | 3.08         |  |            |

VWF gene variant data is also available online at <http://evs.gs.washington.edu/EVS/>. VWF variants previously reported are annotated with references and color coded: Orange highlighting indicates variants reported to be functional and/or associated with VWD, green highlighting indicates variants reported to be benign and/or reported in normal individuals with function unknown. Red highlighting indicates variants which introduce a premature STOP codon and predicted or known non-functional allele. The 30 missense and 28 synonymous single nucleotide variants SNV with MAF>0.1% identified by exome sequencing and successfully imputed in our African American study sample are highlighted in **bold type**.

EA, European American; AA=African American; MAF, minor allele frequency. GERP, Genomic Evolutionary Rate Profiling (GERP), which identifies functionally constrained DNA sequence elements using multiple sequence alignments to quantify nucleotide substitution deficits ("rejected substitutions") that reflect the strength of past purifying selection.

\*The alleles are based on the genomic sequence (NCBI build 37) and show the reference nucleotide first and the variant or non-reference nucleotide second. Note that the VWF cDNA reference sequence (NM\_000552.3) is on the reverse strand of the human genome sequence and therefore the alleles are annotated to the complementary genome build.

### Reference List

1. Wang QY, Song J, Gibbs RA et al. Characterizing polymorphisms and allelic diversity of von Willebrand factor gene in the 1000 Genomes. J Thromb Haemost 2013;11(2):261-269.
2. James PD, Notley C, Hegadorn C et al. The mutational spectrum of type 1 von Willebrand disease: Results from a Canadian cohort study. Blood 2007;109(1):145-154.

3. Bellissimo DB, Christopherson PA, Flood VH et al. VWF mutations and new sequence variations identified in healthy controls are more frequent in the African-American population. *Blood* 2012;119(9):2135-2140.
4. ISTH-SSC VWF Online Database (VWFdb). <http://www.vwf.group.shef.ac.uk/vwd.html> Date accessed February 1 2013.
5. Allen S, Abuzenadah AM, Hinks J et al. A novel von Willebrand disease-causing mutation (Arg273Trp) in the von Willebrand factor propeptide that results in defective multimerization and secretion. *Blood* 2000;96(2):560-568.
6. Allen S, Goodeve AC, Peake IR, Daly ME. Endoplasmic reticulum retention and prolonged association of a von Willebrand's disease-causing von Willebrand factor variant with ERp57 and calnexin. *Biochem.Biophys.Res.Commun.* 2001;280(2):448-453.
7. Keeney S, Cumming AM. The molecular biology of von Willebrand disease. *Clin.Lab Haematol.* 2001;23(4):209-230.
8. Goodeve A, Eikenboom J, Castaman G et al. Phenotype and genotype of a cohort of families historically diagnosed with type 1 von Willebrand disease in the European study, Molecular and Clinical Markers for the Diagnosis and Management of Type 1 von Willebrand Disease (MCMMDM-1VWD). *Blood* 2007;109(1):112-121.
9. Haberichter SL, Castaman G, Budde U et al. Identification of type 1 von Willebrand disease patients with reduced von Willebrand factor survival by assay of the VWF propeptide in the European study: molecular and clinical markers for the diagnosis and management of type 1 VWD (MCMMDM-1VWD). *Blood* 2008;111(10):4979-4985.
10. Castaman G, Missiaglia E, Federici AB, Schneppenheim R, Rodeghiero F. An additional unique candidate mutation (G2470A; M740I) in the original families with von Willebrand disease type 2 M Vicenza and the G3864A (R1205H) mutation. *Thromb Haemost* 2000;84(2):350-351.
11. Kroner PA, Foster PA, Fahs SA, Montgomery RR. The defective interaction between von Willebrand factor and factor VIII in a patient with type 1 von Willebrand disease is caused by substitution of Arg19 and His54 in mature von Willebrand factor. *Blood* 1996;87(3):1013-1021.
12. Klemm T, Mehnert AK, Siegemund A et al. Impact of the Thr789Ala variant of the von Willebrand factor levels, on ristocetin co-factor and collagen binding capacity and its association with coronary heart disease in patients with diabetes mellitus type 2. *Exp.Clin.Endocrinol.Diabetes* 2005;113(10):568-572.
13. Lacquemant C, Gaucher C, Delorme C et al. Association between high von willebrand factor levels and the Thr789Ala vWF gene polymorphism but not with nephropathy in type I diabetes. The GENEDIAB Study Group and the DESIR Study Group. *Kidney Int.* 2000;57(4):1437-1443.
14. Smith NL, Rice KM, Bovill EG et al. Genetic variation associated with plasma von Willebrand factor levels and the risk of incident venous thrombosis. *Blood* 2011;117(22):6007-6011.
15. Bowen DJ, Standen GR, Mazurier C et al. Type 2N von Willebrand disease: rapid genetic diagnosis of G2811A (R854Q), C2696T (R816W), T2701A (H817Q) and G2823T (C858F)--detection of a novel candidate type 2N mutation: C2810T (R854W). *Thromb Haemost* 1998;80(1):32-36.
16. Eikenboom JC, Reitsma PH, Peerlinck KM, Briet E . Recessive inheritance of von Willebrand's disease type I. *Lancet* 1993;341(8851):982-986.
17. Peerlinck K, Eikenboom JC, Ploos van Amstel HK et al. A patient with von Willebrand's disease characterized by a compound heterozygosity for a substitution of Arg854 by Gln in the putative factor-VIII-binding domain of von Willebrand factor (vWF) on one allele and very low levels of mRNA from the second vWF allele. *Br.J Haematol.* 1992;80(3):358-363.

18. Berber E, James PD, Hough C, Lillicrap D. An assessment of the pathogenic significance of the R924Q von Willebrand factor substitution. *J Thromb Haemost* 2009;7(10):1672-1679.
19. O'Brien LA, James PD, Othman M et al. Founder von Willebrand factor haplotype associated with type 1 von Willebrand disease. *Blood* 2003;102(2):549-557.
20. Hagiwara T, Inaba H, Yoshida S et al. A novel mutation Gly 1672-->Arg in type 2A and a homozygous mutation in type 2B von Willebrand disease. *Thromb Haemost* 1996;76(2):253-257.
21. James PD, Notley C, Hegadorn C et al. Challenges in defining type 2M von Willebrand disease: results from a Canadian cohort study. *J.Thromb.Haemost.* 2007;5(9):1914-1922.



**Supplemental Table 2. Functional predictions for 30 VWF missense variants based on sequence conservation**

| Chromosome: Position (NCBI Build 37) | Protein position | Amino acids | cDNA position (NM_000552.3) | Codon (NM_000552.3) | rs ID number | GERP score | SIFT score | POLYPHEN2 score | Mutation Assessor score | Condel score | Condel Prediction |
|--------------------------------------|------------------|-------------|-----------------------------|---------------------|--------------|------------|------------|-----------------|-------------------------|--------------|-------------------|
| 12:6220051                           | 102              | Val/Met     | 559                         | Gtg/Atg             | rs147514785  | 2.3        | 0          | 0.011           | 3.285                   | 0.001        | neutral           |
| 12:6219687                           | 129              | Leu/Met     | 640                         | Ctg/Atg             | rs61753991   | 3.73       | 0          | 0.701           | 2.475                   | 0.752        | deleterious       |
| 12:6219681                           | 131              | Gly/Ser     | 646                         | Ggt/Agt             | rs76505074   | 4.67       | 1          | 0               | -2.695                  | 0            | neutral           |
| 12:6182828                           | 318              | Asn/Lys     | 1209                        | aaT/aaG             | rs1800387    | -3.54      | 0.01       | 0.005           | 1.34                    | 0.004        | neutral           |
| 12:6181569                           | 346              | Thr/Ile     | 1292                        | aCc/aTc             | rs111971143  | 5.55       | 0.01       | 0.112           | 1.525                   | 0.013        | neutral           |
| 12:6173433                           | 471              | Val/Ile     | 1666                        | Gtc/Atc             | rs1800377    | -2.9       | 0.57       | 0.001           | 0.185                   | 0.001        | neutral           |
| 12:6172202                           | 484              | His/Arg     | 1706                        | cAt/cGt             | rs1800378    | 1.25       | 1          | 0.132           | -0.79                   | 0.011        | neutral           |
| 12:6153559                           | 780              | Asn/Lys     | 2595                        | aaC/aaG             | rs143904314  | 3.27       | 0.07       | 0.999           | 1.54                    | 0.499        | deleterious       |
| 12:6153534                           | 789              | Thr/Ala     | 2620                        | Acc/Gcc             | rs1063856    | 2.17       | 1          | 0               | -0.895                  | 0            | neutral           |
| 12:6145649                           | 817              | His/Gln     | 2706                        | caT/caG             | rs57950734   | -0.03      | 0.02       | 0.998           | 1.69                    | 0.857        | deleterious       |
| 12:6145590                           | 837              | Ala/Asp     | 2765                        | gCc/gAc             | rs75645183   | 3.05       | 0.26       | 0.698           | 1.915                   | 0.258        | neutral           |
| 12:6143913                           | 876              | Leu/Phe     | 2881                        | Ctc/Ttc             | rs143762054  | 2.72       | 0.02       | 0.287           | 1.39                    | 0.039        | neutral           |
| 12:6138575                           | 967              | Gly/Asp     | 3155                        | gGc/gAc             | rs141087261  | 3.69       | 0.36       | 0.857           | 1.1                     | 0.335        | neutral           |
| 12:6135091                           | 1030             | Gln/Arg     | 3344                        | cAg/cGg             | rs145125264  | 2.27       | 0.01       | 0.055           | 1.415                   | 0.007        | neutral           |
| 12:6128454                           | 1377             | Ala/Val     | 4385                        | gCc/gTc             | rs141211612  | 4.08       | 0          | 1               | 3.295                   | 1            | deleterious       |
| 12:6128446                           | 1380             | Ile/Val     | 4393                        | Atc/Gtc             | rs11063988   | -3.75      | 0.32       | 0               | 0.385                   | 0.005        | neutral           |
| 12:6128280                           | 1435             | Asn/Ser     | 4559                        | aAc/aGc             | rs11063987   | 4.35       | 0.26       | 0.075           | 3.12                    | 0.012        | neutral           |
| 12:6128269                           | 1439             | Val/Met     | 4570                        | Gtg/Atg             | rs150077670  | -1.93      | 0.1        | 0.002           | 3.28                    | 0.018        | neutral           |
| 12:6128170                           | 1472             | Asp/His     | 4669                        | Gac/Cac             | rs61750092   | 0.812      | 0.18       | 0               | -1.085                  | 0.011        | neutral           |
| 12:6128127                           | 1486             | Ser/Leu     | 4712                        | tCg/tTg             | rs149424724  | 3          | 0.27       | 0               | 1.635                   | 0.006        | neutral           |
| 12:6125820                           | 1725             | Pro/Ser     | 5428                        | Cct/Tct             | rs78302129   | 3.39       | 0.1        | 0.172           | 2.515                   | 0.034        | neutral           |
| 12:6103094                           | 2178             | Ala/Ser     | 6787                        | Gcc/Tcc             | rs34230288   | -0.724     | 0.42       | 0               | 1.275                   | 0.003        | neutral           |
| 12:6103072                           | 2185             | Arg/Gln     | 6809                        | cGg/cAg             | rs76342212   | 5.3        | 0.17       | 0.9             | 1.37                    | 0.368        | neutral           |
| 12:6094771                           | 2287             | Arg/Trp     | 7114                        | Cgg/Tgg             | rs61750625   | 1.58       | 0          | 1               | 2.48                    | 1            | deleterious       |
| 12:6092338                           | 2353             | Glu/Asp     | 7314                        | gaG/gaT             | rs112319661  | 0.467      | 0.13       | 0.967           | 1.905                   | 0.419        | neutral           |
| 12:6091089                           | 2384             | Arg/Trp     | 7405                        | Cgg/Tgg             | rs145697622  | 4.1        | 0          | 0.998           | 2.35                    | 0.974        | deleterious       |
| 12:6078424                           | 2561             | Phe/Tyr     | 7937                        | tTt/tAt             | rs35335161   | 4.87       | 0.16       | 0.395           | 2.135                   | 0.059        | neutral           |

|            |      |         |      |         |             |       |      |       |       |       |             |
|------------|------|---------|------|---------|-------------|-------|------|-------|-------|-------|-------------|
| 12:6061675 | 2666 | Thr/Met | 8252 | aCg/aTg | rs78353028  | 0.378 | 0.12 | 0.001 | 1.395 | 0.015 | neutral     |
| 12:6061559 | 2705 | Gly/Arg | 8368 | Gga/Cga | rs7962217   | 5.45  | 0    | 0.903 | 2.65  | 0.858 | deleterious |
| 12:6058245 | 2793 | Val/Ala | 8633 | gTt/gCt | rs143743709 | 5.01  | 0.02 | 0.038 | 1.95  | 0.01  | neutral     |

See Supplementary Methods for details.

Genomic Evolutionary Rate Profiling (GERP) identifies functionally constrained DNA sequence elements using multiple sequence alignments to quantify nucleotide substitution deficits ("rejected substitutions") that reflect the strength of past purifying selection. GERP scores range from -12.3 to 6.17, with 6.17 being the most conserved or functionally constrained. SIFT scores range from 0 to 1 and represent normalized probabilities for all possible substitutions based on the sequence alignment. Positions with normalized probabilities less than 0.05 are predicted to be deleterious, those greater than or equal to 0.05 are predicted to be tolerated. PolyPhen-2 range from 0 to 1 and represent the probability that the mutation is damaging. A mutation is also appraised qualitatively, as benign, possibly damaging, or probably damaging based on optimized false positive rate (FPR) thresholds. Mutations with their posterior probability scores associated with estimated FPR at or below 5% are predicted to be probably damaging (more confident prediction). Mutations with the posterior probabilities associated with FPR at or below the 10% are predicted to be possibly damaging (less confident prediction). Mutations with estimated FPR above 10% are classified as benign. MutationAssessor provides a functional impact score that ranges from -5.76 to +5.37 and variants scoring below 1.938 are classified as non-functional and variants scoring above this threshold are predicted to result in altered function. Condel (CONsensus DELeteriousness score of non-synonymous single nucleotide variants) integrates the output of SIFT, Polyphen2, and MutationAssessor into a single consensus prediction.

**Supplemental Table 3. Association of 30 VWF missense variants with natural-log transformed von Willebrand factor antigen (VWF) and factor VIII activity (FVIII)**

| Chromosome: Position (NCBI Build 37) | Rs #      | Alleles (NCBI Build 37)* | Amino acids | MAF    | Imputation Rsq | Natural-log transformed VWF:Ag |       |          |                 |                       | Natural-log transformed FVIII:C |       |          |                 |                       |
|--------------------------------------|-----------|--------------------------|-------------|--------|----------------|--------------------------------|-------|----------|-----------------|-----------------------|---------------------------------|-------|----------|-----------------|-----------------------|
|                                      |           |                          |             |        |                | Beta coefficient               | SE    | P-value  | P heterogeneity | r <sup>2</sup> metric | Beta coefficient                | SE    | P-value  | P heterogeneity | r <sup>2</sup> metric |
| 12:6220051                           | 147514785 | C/T                      | Val102Met   | 0.006  | 0.877          | 0.142                          | 0.084 | 0.092    | 0.51            | 0                     | 0.1423                          | 0.052 | 0.0063   | 0.83            | 0                     |
| 12:6219687                           | 61753991  | G/T                      | Leu129Met   | 0.009  | 0.775          | 0.025                          | 0.068 | 0.706    | 0.33            | 12.3                  | 0.0909                          | 0.047 | 0.053    | 0.07            | 54.4                  |
| 12:6219681                           | 76505074  | C/T                      | Gly131Ser   | 0.02   | 0.748          | -0.082                         | 0.041 | 0.046    | 0.12            | 44.3                  | -0.0901                         | 0.03  | 0.003317 | 0.75            | 0                     |
| 12:6182828                           | 1800387   | A/T                      | Asn318Lys   | 0.41   | 0.794          | 0.026                          | 0.012 | 0.028    | 0.42            | 0                     | 0.0092                          | 0.008 | 0.295    | 0.78            | 0                     |
| 12:6181569                           | 111971143 | A/G                      | Thr346Ile   | 0.013  | 0.824          | 0.044                          | 0.052 | 0.397    | 0.59            | 0                     | 0.0266                          | 0.035 | 0.455    | 0.96            | 0                     |
| 12:6173433                           | 1800377   | C/T                      | Val471Ile   | 0.15   | 0.744          | 0.015                          | 0.017 | 0.38     | 0.64            | 0                     | -0.0091                         | 0.012 | 0.475    | 0.83            | 0                     |
| 12:6172202                           | 1800378   | C/T                      | His484Arg   | 0.22   | 0.762          | -0.023                         | 0.014 | 0.109    | 0.02            | 65                    | -0.0042                         | 0.01  | 0.694    | 0.98            | 0                     |
| 12:6153559                           | 143904314 | C/G                      | Asn780Lys   | 0.0035 | 0.968          | 0.188                          | 0.103 | 0.0693   | 0.44            | 0                     | 0.093                           | 0.073 | 0.198    | 0.31            | 15.5                  |
| 12:6153534                           | 1063856   | C/T                      | Thr789Ala   | 0.41   | 0.996          | -0.066                         | 0.01  | 1.05E-09 | 0.18            | 35.6                  | -0.037                          | 0.007 | 1.24E-06 | 0.07            | 53.3                  |
| 12:6145649                           | 57950734  | A/T                      | His817Gln   | 0.11   | 0.966          | 0.031                          | 0.018 | 0.0776   | 0.23            | 28.6                  | 0.1205                          | 0.012 | 1.77E-21 | 0.01            | 68.2                  |
| 12:6145590                           | 75645183  | G/T                      | Ala837Asp   | 0.024  | 0.762          | 0.081                          | 0.038 | 0.0341   | 0.43            | 0                     | 0.012                           | 0.028 | 0.673    | 0.9             | 0                     |
| 12:6143913                           | 143762054 | A/G                      | Leu876Phe   | 0.0012 | 0.87           | -0.013                         | 0.009 | 0.164    | 0.32            | 10.7                  | 0.325                           | 0.17  | 0.056    | 0.42            | 0                     |
| 12:6138575                           | 141087261 | C/T                      | Gly967Asp   | 0.027  | 0.816          | 0.02                           | 0.036 | 0.578    | 0.82            | 0                     | 0.0263                          | 0.026 | 0.311    | 0.27            | 23.4                  |
| 12:6135091                           | 145125264 | C/T                      | Gln1030Arg  | 0.008  | 0.903          | 0.0133                         | 0.009 | 0.158    | 0.59            | 0                     | 0.0004                          | 0.008 | 0.963    | 0.74            | 0                     |
| 12:6128454                           | 141211612 | A/G                      | Ala1377Val  | 0.0023 | 0.809          | -0.335                         | 0.132 | 0.0114   | 0.05            | 61.6                  | -0.149                          | 0.088 | 0.09     | 0.37            | 5.4                   |
| 12:6128446                           | 11063988  | C/T                      | Ile1380Val  | 0.11   | 0.831          | -0.059                         | 0.018 | 0.0016   | 0.78            | 0                     | -0.064                          | 0.013 | 2.74E-06 | 0.33            | 12.9                  |
| 12:6128280                           | 11063987  | C/T                      | Asn1435Ser  | 0.11   | 0.854          | -0.055                         | 0.018 | 0.0028   | 0.8             | 0                     | -0.064                          | 0.013 | 1.71E-06 | 0.3             | 18                    |
| 12:6128269                           | 150077670 | C/T                      | Val1439Met  | 0.0046 | 0.901          | -0.327                         | 0.095 | 0.0006   | 0.27            | 21.9                  | -0.118                          | 0.066 | 0.074    | 0.69            | 0                     |
| 12:6128170                           | 1800383   | C/G                      | Asp1472His  | 0.4    | 0.72           | 0.038                          | 0.012 | 0.001    | 0.48            | 0                     | 0.0183                          | 0.009 | 0.055    | 0.17            | 37.6                  |
| 12:6128127                           | 149424724 | A/G                      | Ser1486Leu  | 0.008  | 0.751          | -0.358                         | 0.067 | 1.18E-07 | 0.11            | 45.8                  | -0.12                           | 0.049 | 0.015    | 0.17            | 37.4                  |
| 12:6125820                           | 78302129  | A/G                      | Pro1725Ser  | 0.024  | 0.713          | 0.097                          | 0.039 | 0.012    | 0.33            | 12.5                  | 0.012                           | 0.029 | 0.666    | 0.95            | 0                     |
| 12:6103094                           | 34230288  | A/C                      | Ala2178Ser  | 0.0038 | 0.781          | -0.057                         | 0.115 | 0.617    | 0.18            | 38.6                  | -0.1                            | 0.082 | 0.223    | 0.22            | 31.4                  |
| 12:6103072                           | 76342212  | C/T                      | Arg2185Gln  | 0.2    | 0.969          | -0.101                         | 0.014 | 6.24E-13 | 0.57            | 0                     | -0.085                          | 0.01  | 1.86E-17 | 0.08            | 52.1                  |
| 12:6094771                           | 61750625  | A/G                      | Arg2287Trp  | 0.01   | 0.685          | -0.306                         | 0.063 | 1.33E-06 | 0.06            | 55.7                  | -0.11                           | 0.048 | 0.021    | 0.11            | 46.8                  |

|            |           |     |            |        |       |        |       |       |      |      |        |       |       |      |      |
|------------|-----------|-----|------------|--------|-------|--------|-------|-------|------|------|--------|-------|-------|------|------|
| 12:6092338 | 112319661 | C/G | Glu2353Asp | 0.0066 | 0.947 | 0.012  | 0.009 | 0.191 | 0.03 | 65.5 | 0.003  | 0.008 | 0.717 | 0.01 | 71.6 |
| 12:6091089 | 145697622 | A/G | Arg2384Trp | 0.0023 | 0.866 | -0.241 | 0.154 | 0.118 | 0.17 | 37   | -0.027 | 0.075 | 0.721 | 0.34 | 11.5 |
| 12:6078424 | 35335161  | A/T | Phe2561Tyr | 0.025  | 0.595 | 0.007  | 0.043 | 0.866 | 0.72 | 0    | 0.008  | 0.031 | 0.777 | 0.14 | 41.6 |
| 12:6061675 | 78353028  | A/G | Thr2666Met | 0.07   | 0.985 | 0.038  | 0.021 | 0.078 | 0.36 | 7.7  | 0.037  | 0.015 | 0.014 | 0.18 | 36.3 |
| 12:6061559 | 7962217   | C/T | Gly2705Arg | 0.02   | 0.999 | 0.023  | 0.039 | 0.549 | 0.92 | 0    | 0.033  | 0.029 | 0.254 | 0.53 | 0    |
| 12:6058245 | 143743709 | A/G | Val2793Ala | 0.007  | 0.902 | 0.154  | 0.077 | 0.046 | 0.08 | 52.2 | 0.027  | 0.049 | 0.578 | 0.09 | 49.6 |

MAF, minor allele frequency; SE, standard error; VWF:Ag, von Willebrand factor antigen; FVIII:C, factor VIII clotting activity.

\*The alleles are based on the genomic sequence (NCBI build 37) and show the reference nucleotide first and the variant or non-reference nucleotide second. Note that the VWF cDNA reference sequence (NM\_000552.3) is on the reverse strand of the human genome sequence and therefore the alleles are annotated to the complementary genome build.

As described under Supplemental Methods, we tested for between-study heterogeneity of results by using Cochran's  $Q$  statistic ( $P$  for heterogeneity) and the  $I^2$  inconsistency metric. The  $I^2$  metric ranges from 0-100%, and measures the degree of inconsistency across studies in a meta-analysis as the percentage of total variation across studies that is due to heterogeneity rather than chance. Low, moderate, and high degrees of heterogeneity between studies is defined as  $I^2$  values of 25%, 50%, and 75%, respectively.

**Supplemental Table 4. VWF missense variants located in A1 domain and their association with natural-log transformed VWF antigen and VWF ristocetin cofactor activity**

| Variant    | Rs#       | annotation | N   | VWF antigen Beta | VWF antigen SE | VWF antigen P-value | N   | VWF activity Beta | VWF activity SE | VWF activity P-value | N   | VWF activity/antigen ratio Beta | VWF activity/antigen ratio SE | VWF activity/antigen ratio P-value |
|------------|-----------|------------|-----|------------------|----------------|---------------------|-----|-------------------|-----------------|----------------------|-----|---------------------------------|-------------------------------|------------------------------------|
| 12:6128446 | 11063988  | Ile1380Val | 242 | 0.080            | 0.069          | 0.25                | 172 | 0.055             | 0.080           | 0.49                 | 166 | -0.0004                         | 0.013                         | 0.97                               |
| 12:6128280 | 11063987  | Asn1435Ser | 242 | 0.080            | 0.069          | 0.25                | 172 | 0.053             | 0.080           | 0.50                 | 166 | -0.0005                         | 0.013                         | 0.97                               |
| 12:6128269 | 150077670 | Met1439Val | 242 | -0.52            | 0.25           | 0.037               | 172 | -0.55             | 0.24            | 0.024                | 166 | -0.0067                         | 0.037                         | 0.85                               |
| 12:6128170 | 11063988  | Asp1472His | 242 | 0.082            | 0.048          | 0.089               | 172 | 0.123             | 0.053           | 0.022                | 166 | -0.0086                         | 0.008                         | 0.30                               |
| 12:6128127 | 149424724 | Ser1486Leu | 242 | -0.63            | 0.39           | 0.11                | 172 | -0.51             | 0.45            | 0.27                 | 166 | 0.051                           | 0.068                         | 0.46                               |

**Supplemental Figure 1: Pairwise linkage disequilibrium ( $r^2$ ) between 30 VWF missense variants in African Americans.** The upper panel shows the  $-\log(P\text{-value})$  for association for each variant with VWF levels. Shown is the region on chromosome 12p13.31 containing *VWF* (nucleotides 6,058,040 - 6,233,836 corresponding to NC\_000012.11). The bottom panel is a heat map representing strength of LD between variants. Overall, there is little LD between VWF missense variants in AA. Only two pairs of variants had  $r^2 > 0.5$ : 12:6128280 (Ser1435Asn) with 12:6128446 (Ile1380Val) ( $r^2=0.89$ ; red) and 12:6145590 (Asp837Ala) with 12:6125820 (Ser1725Pro) ( $r^2=0.73$ ; orange).

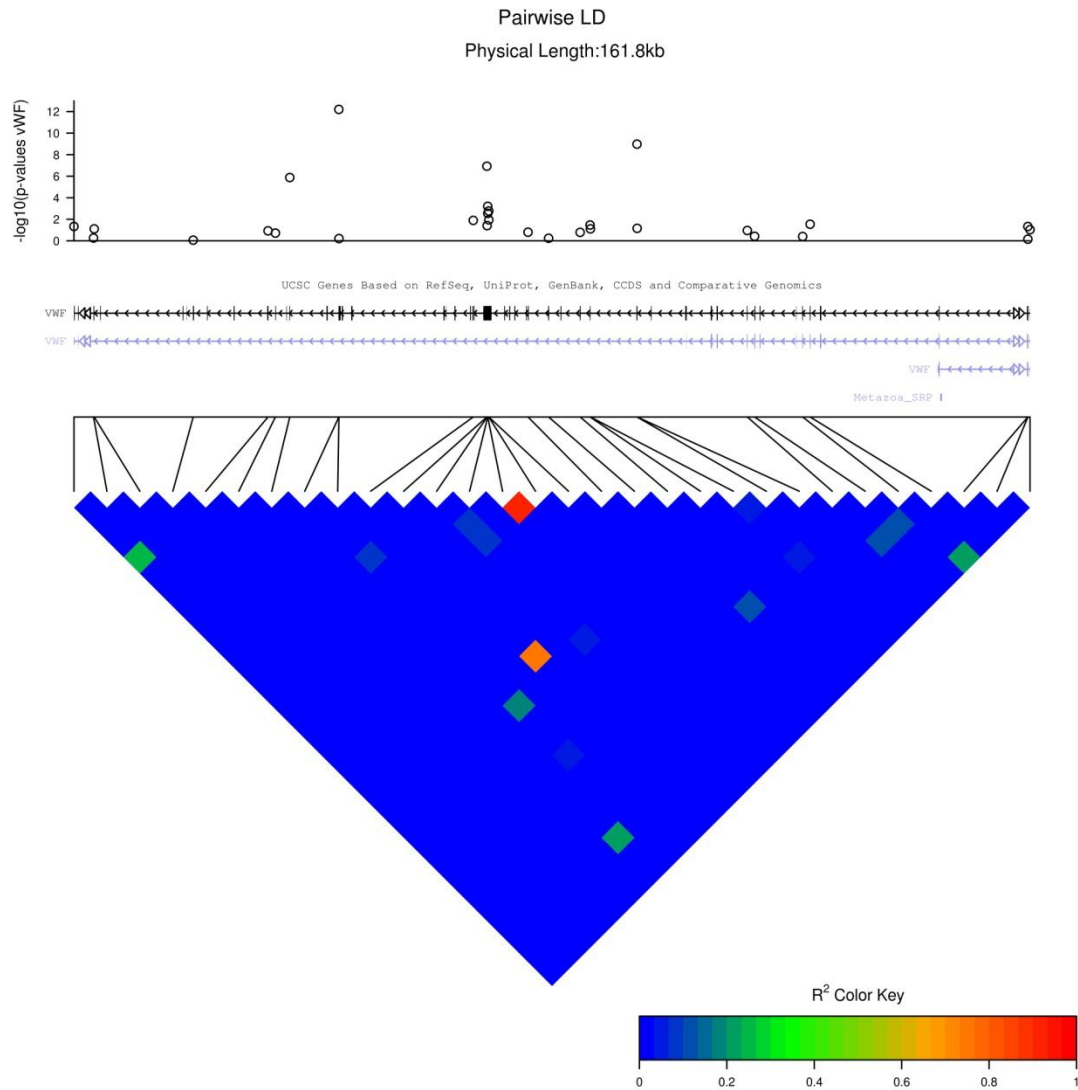

**Supplemental Figure 2: Forest plots of individual study and meta-analysis results for nine VWF missense variants.**

ln(VWF) and p.Thr789Ala

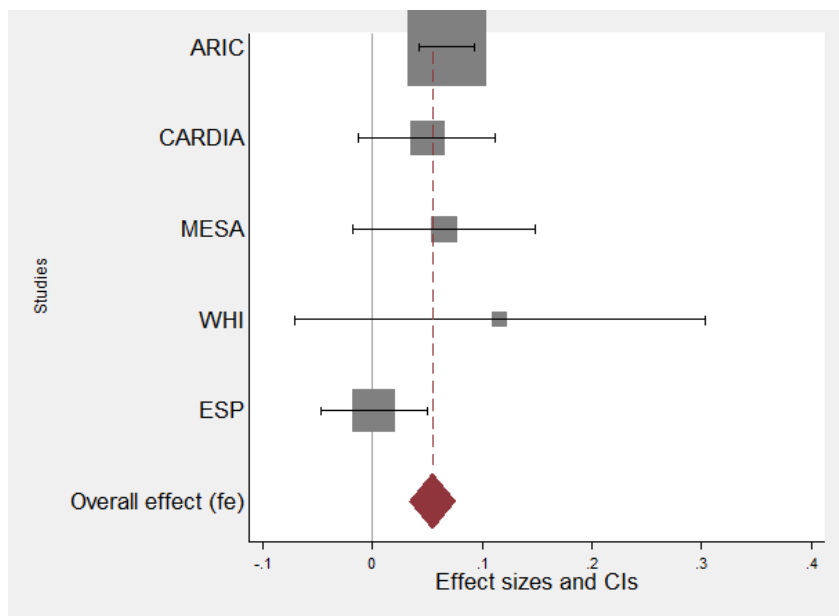

ln(FVIII) and p.Thr789Ala

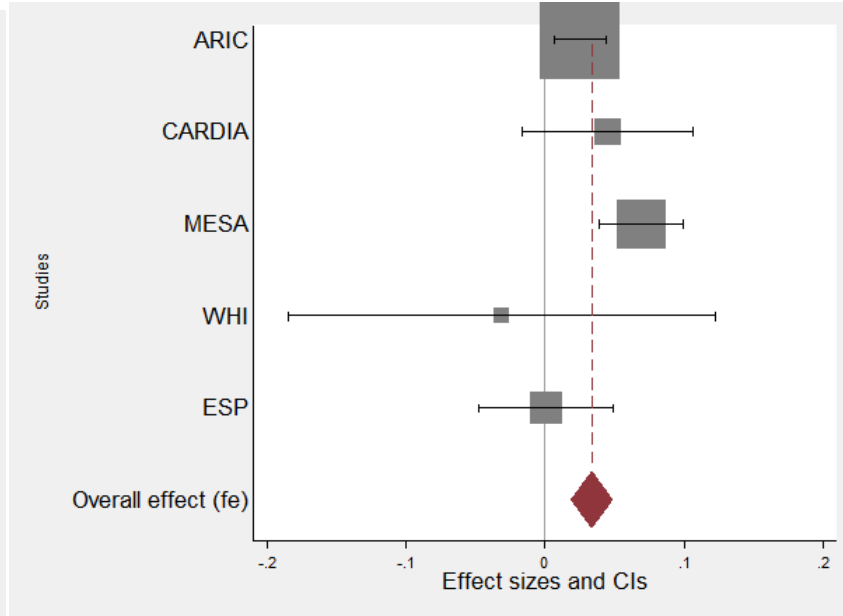

ln(VWF) and p.His817Gln

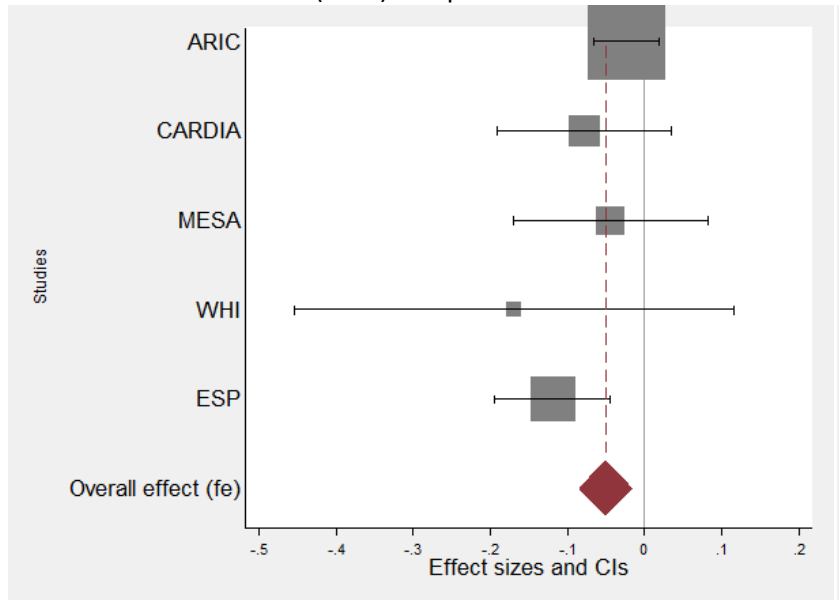

ln(FVIII) and p.His817Gln

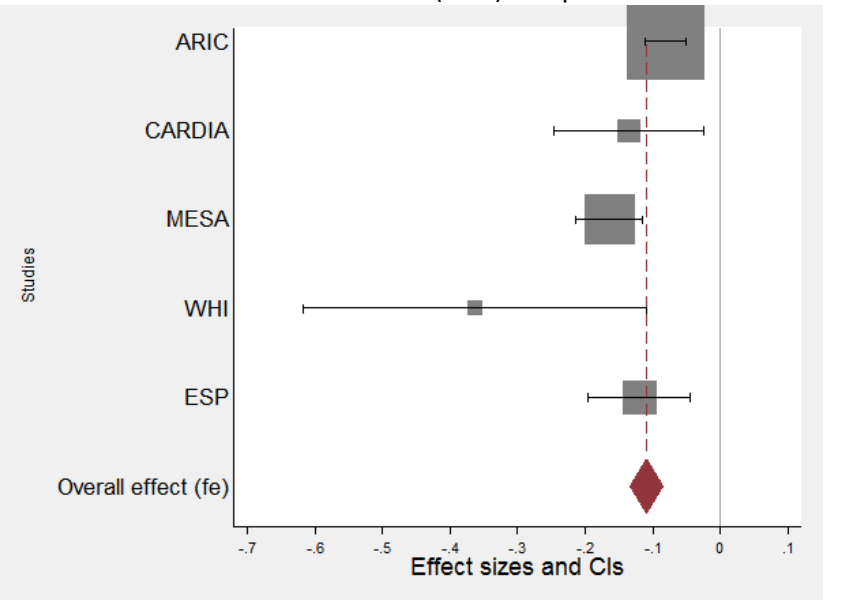

ln(VWF) and p.Ile1380Val

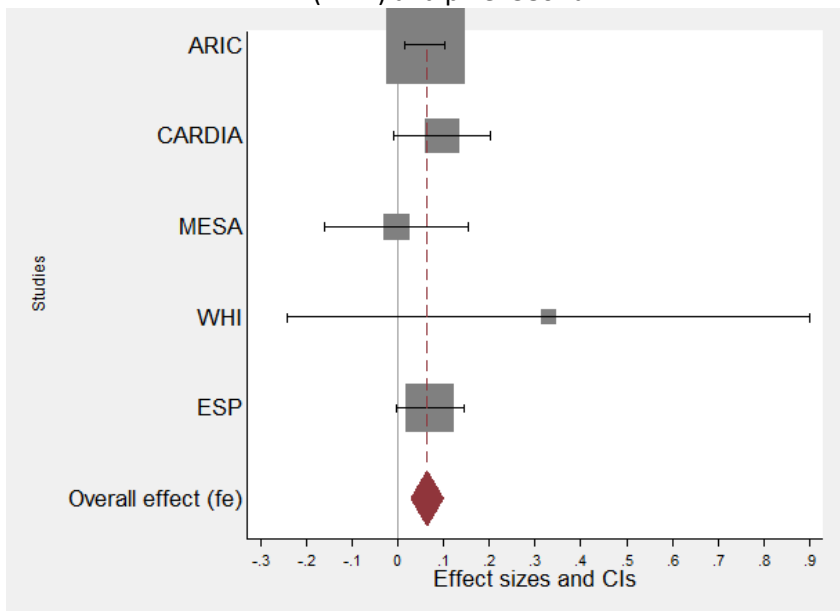

ln(FVIII) and p.Ile1380Val

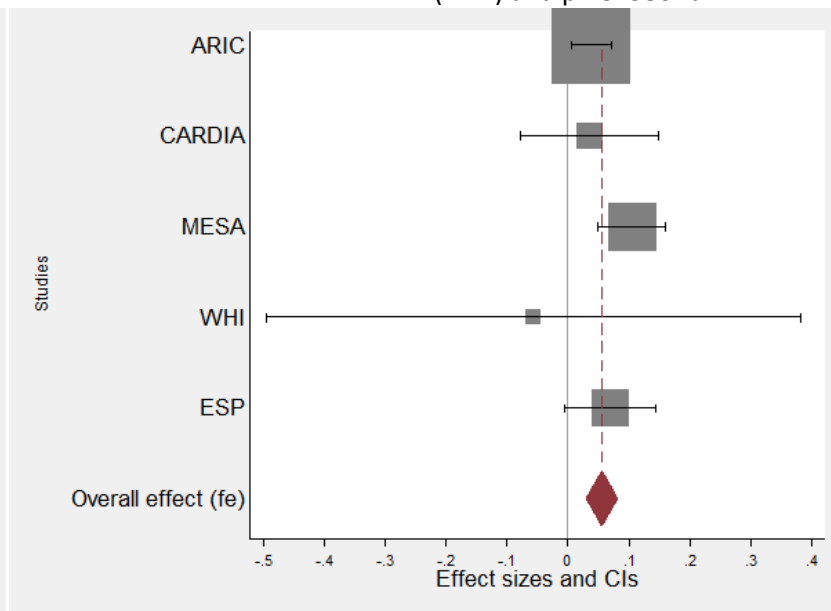

ln(VWF) and p.Asn1435Ser

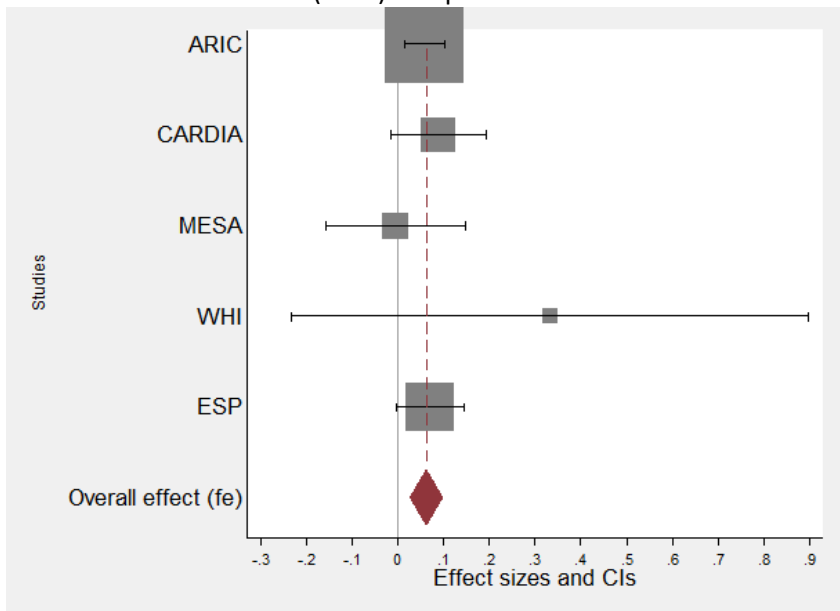

ln(FVIII) and p.Asn1435Ser

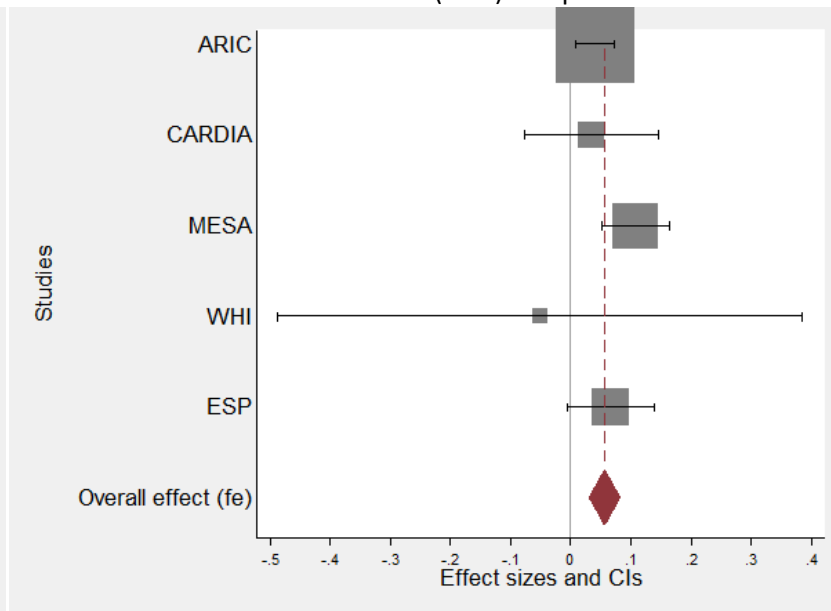



ln(VWF) and p.Val1439Met

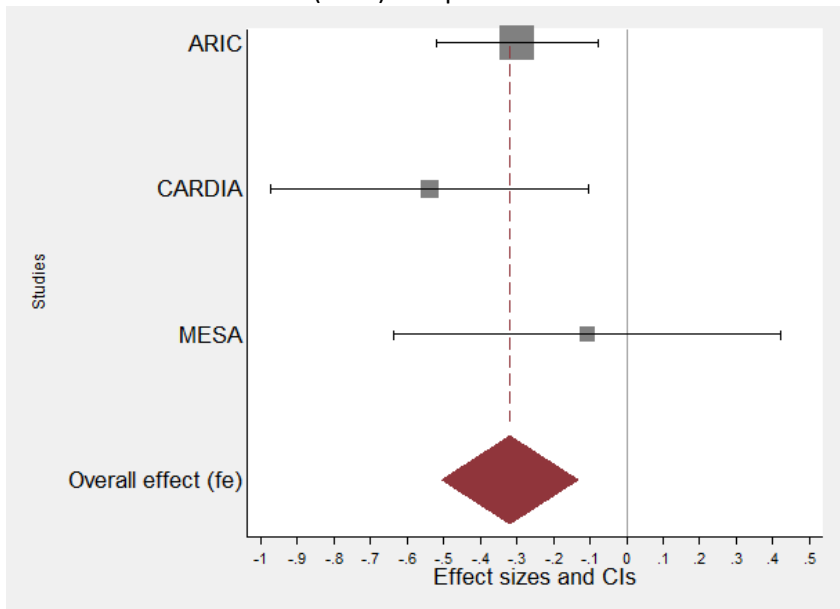

ln(FVIII) and p.Val1439Met

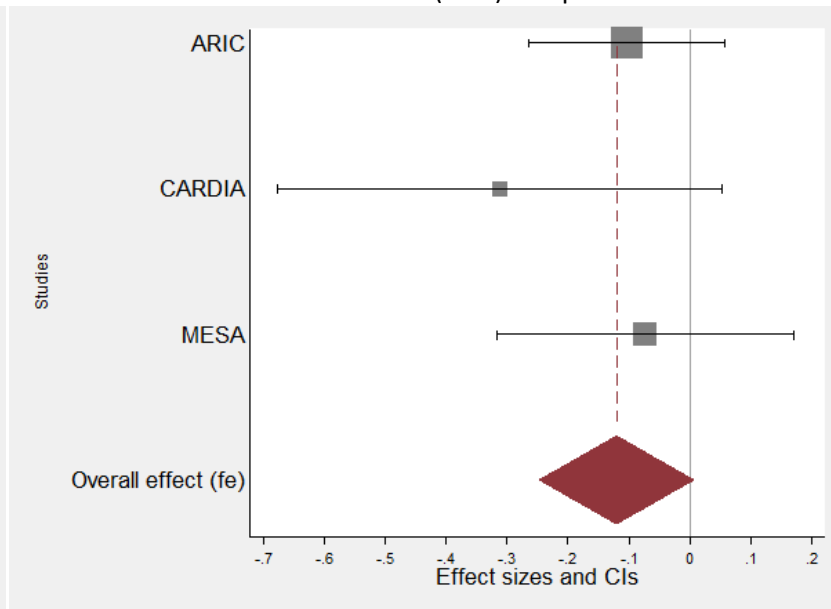

ln(VWF) and p.Asp1472His

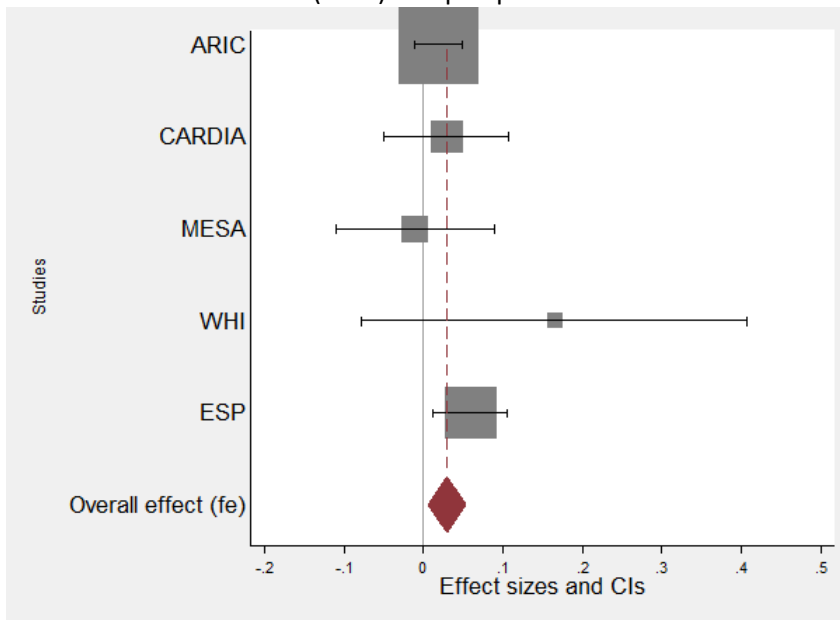

ln(FVIII) and p.Asp1472His

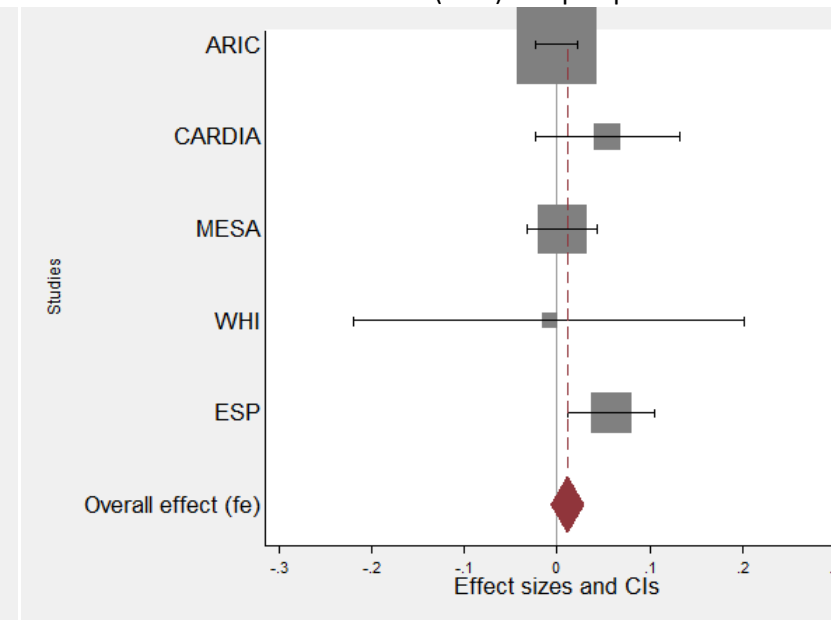

ln(VWF) and p.Ser1486Leu

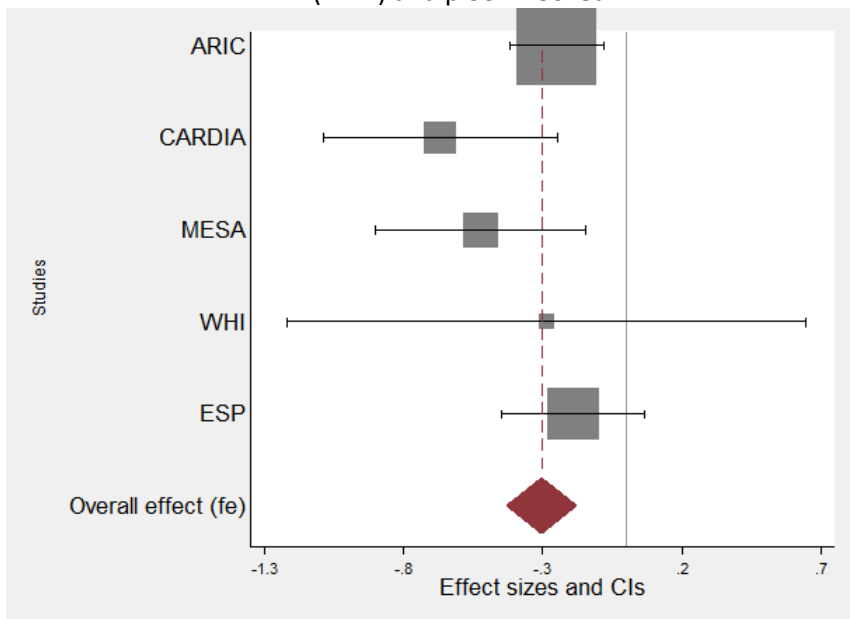

ln(FVIII) and p.Ser1486Leu

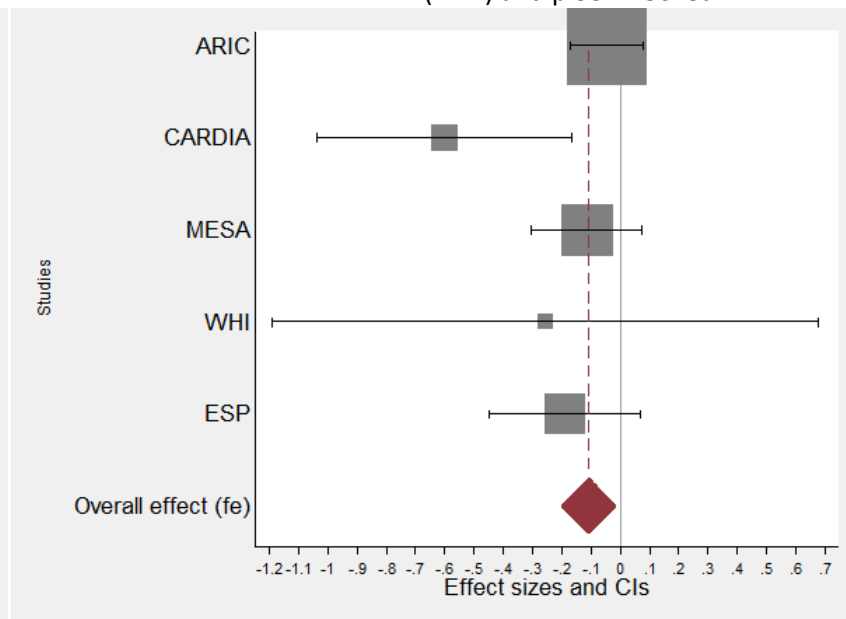

ln(VWF) and p.Arg2185Gln

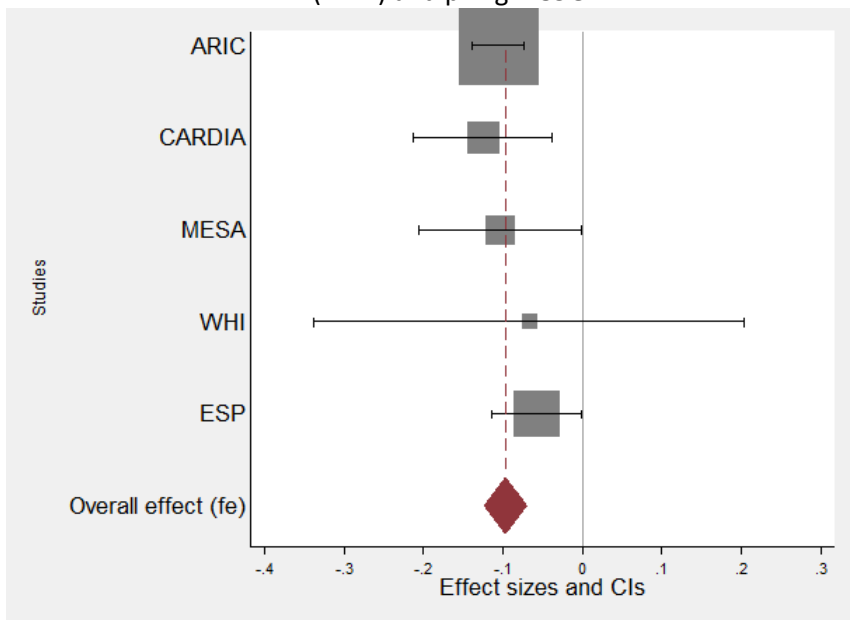

ln(FVIII) and p.Arg2185Gln

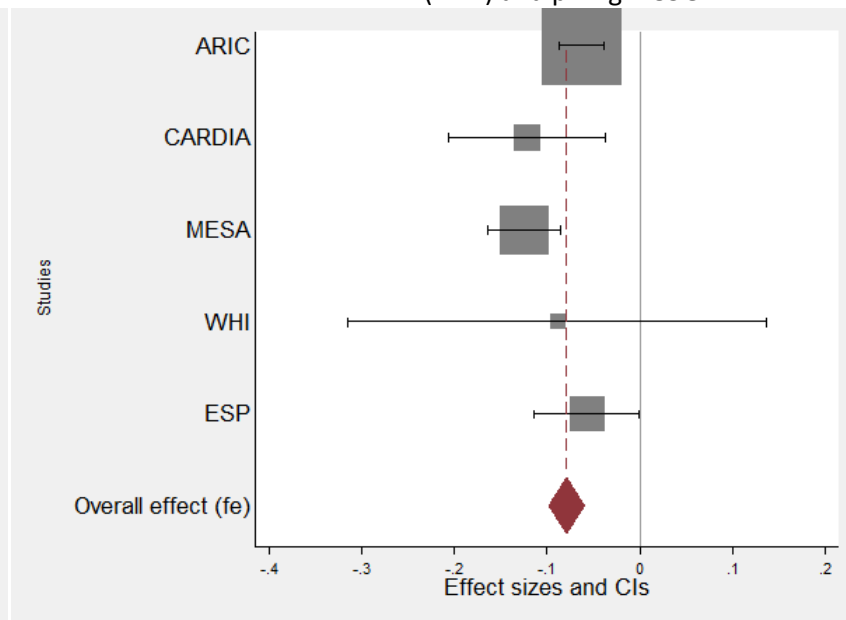

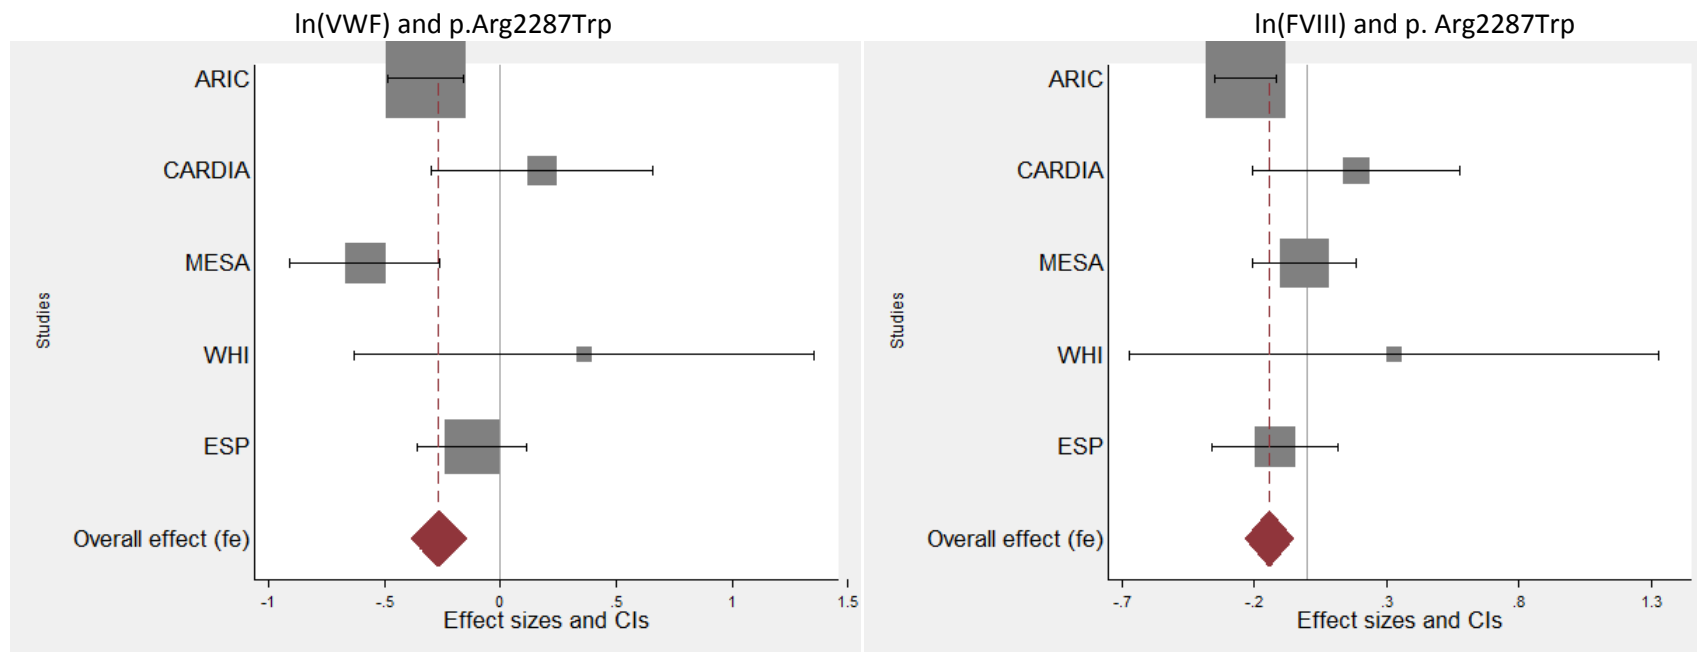

The left-hand column or Y-axis lists the names of the individual studies. The right-hand column is a plot of the measure of effect (on a natural logarithmic scale) for each of these studies (represented by a square) incorporating confidence intervals (CI) represented by horizontal lines. The area of each square is proportional to the study's weight in the meta-analysis. The overall meta-analysis measure of effect is represented as a dashed vertical red line. This summary measure of effect is plotted as a diamond, the lateral points of which indicate confidence intervals for this estimate. A vertical line representing no effect is also plotted in light grey.
